# Supplementary material for: Haplotype Purging after Relaxation of Selection in Lines of Chickens That Had Undergone Long-Term Selection for High and Low Body Weight
Source: MDPI journal article supplement (doi:10.3390/genes11060630), 2020-06-08
Supplement: s1 [file s1]

---

**Table S1.** Number of individuals with genotypes and phenotypes used in the Virginia line AIL for haplotype association analyses.

---

| <b>Generation</b> | <b>Number of Individuals</b> |
|-------------------|------------------------------|
| F <sub>2</sub>    | 665                          |
| F <sub>3</sub>    | 383                          |
| F <sub>4</sub>    | 110                          |
| F <sub>5</sub>    | 115                          |
| F <sub>6</sub>    | 88                           |
| F <sub>7</sub>    | 46                           |
| F <sub>8</sub>    | 254                          |
| F <sub>9</sub>    | 50                           |
| F <sub>10</sub>   | 60                           |
| F <sub>11</sub>   | 59                           |
| F <sub>13</sub>   | 67                           |
| F <sub>14</sub>   | 88                           |
| F <sub>15</sub>   | 682                          |

---

---

**Table S2.** SNPs with allele-frequency difference > 0.5 in purging region in LW lineage on chromosome 1 (177438078-177438879 bp).

---

| Chromosome | Position  | AFD   |
|------------|-----------|-------|
| 1          | 177438813 | 0,558 |
| 1          | 177438879 | 0,584 |

---

**Table S3.** SNPs with allele-frequency difference > 0.5 in purging region in LW lineage on chromosome 6 (16.9-17.7 Mb). Loci highlighted in green were tag SNPs selected by backward-elimination analysis in this region.

| Chromosome | Position | AFD   |
|------------|----------|-------|
| 6          | 16936608 | 0,526 |
| 6          | 16936719 | 0,500 |
| 6          | 16936837 | 0,526 |
| 6          | 16937663 | 0,500 |
| 6          | 16938360 | 0,526 |
| 6          | 16939131 | 0,526 |
| 6          | 16939200 | 0,526 |
| 6          | 16940356 | 0,500 |
| 6          | 16940400 | 0,526 |
| 6          | 16940652 | 0,526 |
| 6          | 16947247 | 0,526 |
| 6          | 16948206 | 0,526 |
| 6          | 16948626 | 0,500 |
| 6          | 16949032 | 0,526 |
| 6          | 16950126 | 0,500 |
| 6          | 16951424 | 0,526 |
| 6          | 16951791 | 0,526 |
| 6          | 16952171 | 0,526 |
| 6          | 16958434 | 0,526 |
| 6          | 16959791 | 0,526 |
| 6          | 16959806 | 0,526 |
| 6          | 16960895 | 0,500 |
| 6          | 17522977 | 0,579 |
| 6          | 17523004 | 0,579 |
| 6          | 17523046 | 0,579 |
| 6          | 17524185 | 0,579 |
| 6          | 17524550 | 0,579 |
| 6          | 17524606 | 0,579 |
| 6          | 17525074 | 0,579 |
| 6          | 17525086 | 0,579 |
| 6          | 17525191 | 0,579 |
| 6          | 17525323 | 0,579 |
| 6          | 17525409 | 0,579 |
| 6          | 17525441 | 0,579 |
| 6          | 17525450 | 0,579 |
| 6          | 17525632 | 0,579 |
| 6          | 17525664 | 0,579 |
| 6          | 17525774 | 0,579 |
| 6          | 17526620 | 0,579 |
| 6          | 17526670 | 0,579 |
| 6          | 17527201 | 0,579 |
| 6          | 17527240 | 0,579 |
| 6          | 17527280 | 0,579 |

|   |          |       |
|---|----------|-------|
| 6 | 17527566 | 0,579 |
| 6 | 17528573 | 0,579 |
| 6 | 17528729 | 0,579 |
| 6 | 17528884 | 0,579 |
| 6 | 17528928 | 0,579 |
| 6 | 17528959 | 0,579 |
| 6 | 17529607 | 0,579 |
| 6 | 17529609 | 0,579 |
| 6 | 17529644 | 0,579 |
| 6 | 17529667 | 0,579 |
| 6 | 17529764 | 0,579 |
| 6 | 17530052 | 0,579 |
| 6 | 17530251 | 0,579 |
| 6 | 17530252 | 0,579 |
| 6 | 17530975 | 0,579 |
| 6 | 17531356 | 0,579 |
| 6 | 17531439 | 0,579 |
| 6 | 17531442 | 0,579 |
| 6 | 17531522 | 0,579 |
| 6 | 17531528 | 0,579 |
| 6 | 17531555 | 0,579 |
| 6 | 17531572 | 0,579 |
| 6 | 17531575 | 0,579 |
| 6 | 17531577 | 0,579 |
| 6 | 17531617 | 0,579 |
| 6 | 17531640 | 0,579 |
| 6 | 17531706 | 0,579 |
| 6 | 17531717 | 0,579 |
| 6 | 17531722 | 0,579 |
| 6 | 17532002 | 0,579 |
| 6 | 17532185 | 0,579 |
| 6 | 17532313 | 0,579 |
| 6 | 17532361 | 0,579 |
| 6 | 17532460 | 0,579 |
| 6 | 17532468 | 0,579 |
| 6 | 17532697 | 0,579 |
| 6 | 17532742 | 0,579 |
| 6 | 17532744 | 0,579 |
| 6 | 17532998 | 0,579 |
| 6 | 17533439 | 0,579 |
| 6 | 17533475 | 0,579 |
| 6 | 17533661 | 0,579 |
| 6 | 17534337 | 0,579 |
| 6 | 17534400 | 0,579 |
| 6 | 17534416 | 0,579 |
| 6 | 17534444 | 0,579 |
| 6 | 17534497 | 0,579 |
| 6 | 17534501 | 0,579 |

|   |          |       |
|---|----------|-------|
| 6 | 17534605 | 0,579 |
| 6 | 17534631 | 0,579 |
| 6 | 17534663 | 0,579 |
| 6 | 17534670 | 0,579 |
| 6 | 17534683 | 0,579 |
| 6 | 17534707 | 0,579 |
| 6 | 17534718 | 0,579 |
| 6 | 17534767 | 0,579 |
| 6 | 17534781 | 0,579 |
| 6 | 17534811 | 0,579 |
| 6 | 17535010 | 0,579 |
| 6 | 17535090 | 0,579 |
| 6 | 17535356 | 0,579 |
| 6 | 17535842 | 0,579 |
| 6 | 17536248 | 0,579 |
| 6 | 17536444 | 0,579 |
| 6 | 17536546 | 0,579 |
| 6 | 17536736 | 0,579 |
| 6 | 17538172 | 0,579 |
| 6 | 17538618 | 0,579 |
| 6 | 17539125 | 0,579 |
| 6 | 17539189 | 0,579 |
| 6 | 17539197 | 0,579 |
| 6 | 17539240 | 0,579 |
| 6 | 17539271 | 0,579 |
| 6 | 17539344 | 0,579 |
| 6 | 17539411 | 0,579 |
| 6 | 17539429 | 0,579 |
| 6 | 17539462 | 0,579 |
| 6 | 17539832 | 0,579 |
| 6 | 17540206 | 0,579 |
| 6 | 17540418 | 0,579 |
| 6 | 17540458 | 0,579 |
| 6 | 17540779 | 0,579 |
| 6 | 17540788 | 0,579 |
| 6 | 17540796 | 0,579 |
| 6 | 17540802 | 0,579 |
| 6 | 17540807 | 0,579 |
| 6 | 17540843 | 0,579 |
| 6 | 17540922 | 0,579 |
| 6 | 17541527 | 0,579 |
| 6 | 17541745 | 0,579 |
| 6 | 17542383 | 0,579 |
| 6 | 17542393 | 0,579 |
| 6 | 17542403 | 0,579 |
| 6 | 17542440 | 0,579 |
| 6 | 17542506 | 0,579 |
| 6 | 17544709 | 0,579 |

|   |          |       |
|---|----------|-------|
| 6 | 17544818 | 0,579 |
| 6 | 17545262 | 0,579 |
| 6 | 17545346 | 0,579 |
| 6 | 17545387 | 0,579 |
| 6 | 17545471 | 0,579 |
| 6 | 17545686 | 0,579 |
| 6 | 17545767 | 0,579 |
| 6 | 17545835 | 0,579 |
| 6 | 17545859 | 0,579 |
| 6 | 17546460 | 0,579 |
| 6 | 17546484 | 0,579 |
| 6 | 17546499 | 0,579 |
| 6 | 17546500 | 0,579 |
| 6 | 17546656 | 0,579 |
| 6 | 17546677 | 0,579 |
| 6 | 17546828 | 0,579 |
| 6 | 17547151 | 0,579 |
| 6 | 17547223 | 0,579 |
| 6 | 17547537 | 0,579 |
| 6 | 17547544 | 0,579 |
| 6 | 17547651 | 0,579 |
| 6 | 17547717 | 0,579 |
| 6 | 17547718 | 0,579 |
| 6 | 17547744 | 0,579 |
| 6 | 17547755 | 0,579 |
| 6 | 17547937 | 0,579 |
| 6 | 17547979 | 0,579 |
| 6 | 17548076 | 0,579 |
| 6 | 17548130 | 0,579 |
| 6 | 17548205 | 0,579 |
| 6 | 17548508 | 0,579 |
| 6 | 17548517 | 0,579 |
| 6 | 17548522 | 0,579 |
| 6 | 17548526 | 0,579 |
| 6 | 17548580 | 0,579 |
| 6 | 17548599 | 0,579 |
| 6 | 17548641 | 0,579 |
| 6 | 17549016 | 0,579 |
| 6 | 17549154 | 0,579 |
| 6 | 17549181 | 0,579 |
| 6 | 17549185 | 0,579 |
| 6 | 17549273 | 0,579 |
| 6 | 17549278 | 0,579 |
| 6 | 17549319 | 0,579 |
| 6 | 17549353 | 0,579 |
| 6 | 17549360 | 0,579 |
| 6 | 17549386 | 0,579 |
| 6 | 17549389 | 0,579 |

|   |          |       |
|---|----------|-------|
| 6 | 17549471 | 0,579 |
| 6 | 17549475 | 0,579 |
| 6 | 17549476 | 0,579 |
| 6 | 17549477 | 0,579 |
| 6 | 17549527 | 0,579 |
| 6 | 17549947 | 0,579 |
| 6 | 17550114 | 0,579 |
| 6 | 17550352 | 0,579 |
| 6 | 17550462 | 0,579 |
| 6 | 17550688 | 0,579 |
| 6 | 17550819 | 0,579 |
| 6 | 17551541 | 0,579 |
| 6 | 17551690 | 0,579 |
| 6 | 17551716 | 0,579 |
| 6 | 17551760 | 0,579 |
| 6 | 17551834 | 0,579 |
| 6 | 17551852 | 0,579 |
| 6 | 17551946 | 0,579 |
| 6 | 17552005 | 0,579 |
| 6 | 17552828 | 0,579 |
| 6 | 17552829 | 0,579 |
| 6 | 17552858 | 0,579 |
| 6 | 17553080 | 0,579 |
| 6 | 17553104 | 0,579 |
| 6 | 17553332 | 0,579 |
| 6 | 17553855 | 0,579 |
| 6 | 17553859 | 0,579 |
| 6 | 17554058 | 0,579 |
| 6 | 17556289 | 0,579 |
| 6 | 17557133 | 0,579 |
| 6 | 17557346 | 0,579 |
| 6 | 17559515 | 0,579 |
| 6 | 17559687 | 0,579 |
| 6 | 17560297 | 0,579 |
| 6 | 17560854 | 0,579 |
| 6 | 17561418 | 0,579 |
| 6 | 17561463 | 0,579 |
| 6 | 17561656 | 0,579 |
| 6 | 17561657 | 0,579 |
| 6 | 17561857 | 0,579 |
| 6 | 17561869 | 0,579 |
| 6 | 17561875 | 0,579 |
| 6 | 17561880 | 0,579 |
| 6 | 17561899 | 0,579 |
| 6 | 17561912 | 0,579 |
| 6 | 17562143 | 0,579 |
| 6 | 17562148 | 0,579 |
| 6 | 17562152 | 0,579 |

|   |          |       |
|---|----------|-------|
| 6 | 17562158 | 0,579 |
| 6 | 17562363 | 0,579 |
| 6 | 17562636 | 0,579 |
| 6 | 17562859 | 0,579 |
| 6 | 17562860 | 0,579 |
| 6 | 17563084 | 0,579 |
| 6 | 17563304 | 0,579 |
| 6 | 17563907 | 0,579 |
| 6 | 17563911 | 0,579 |
| 6 | 17563945 | 0,579 |
| 6 | 17563986 | 0,579 |
| 6 | 17564583 | 0,579 |
| 6 | 17565130 | 0,579 |
| 6 | 17565183 | 0,579 |
| 6 | 17565565 | 0,579 |
| 6 | 17593736 | 0,579 |
| 6 | 17596720 | 0,579 |
| 6 | 17596721 | 0,579 |
| 6 | 24711581 | 0,605 |
| 6 | 24711738 | 0,605 |
| 6 | 24711837 | 0,605 |
| 6 | 24711890 | 0,684 |
| 6 | 24712039 | 0,684 |
| 6 | 24712166 | 0,684 |
| 6 | 24712219 | 0,684 |
| 6 | 24712220 | 0,684 |
| 6 | 24712317 | 0,684 |
| 6 | 24712381 | 0,684 |
| 6 | 24712409 | 0,684 |
| 6 | 24712580 | 0,684 |
| 6 | 24712598 | 0,684 |
| 6 | 24712661 | 0,684 |
| 6 | 24712743 | 0,684 |
| 6 | 24712777 | 0,684 |
| 6 | 24712813 | 0,684 |
| 6 | 24712854 | 0,684 |
| 6 | 24712870 | 0,684 |
| 6 | 24712913 | 0,684 |
| 6 | 24712963 | 0,684 |
| 6 | 24713064 | 0,605 |
| 6 | 24713075 | 0,605 |
| 6 | 24713100 | 0,605 |
| 6 | 24713127 | 0,605 |
| 6 | 24713163 | 0,605 |
| 6 | 24713551 | 0,605 |
| 6 | 24713686 | 0,605 |
| 6 | 24713728 | 0,605 |
| 6 | 24713898 | 0,605 |



|   |          |       |
|---|----------|-------|
| 6 | 24713950 | 0,605 |
| 6 | 24714002 | 0,605 |
| 6 | 24714013 | 0,605 |
| 6 | 24714444 | 0,684 |
| 6 | 24714912 | 0,605 |
| 6 | 24715166 | 0,605 |
| 6 | 24715567 | 0,684 |
| 6 | 24715785 | 0,684 |
| 6 | 24715843 | 0,684 |
| 6 | 24715899 | 0,684 |
| 6 | 24716291 | 0,605 |
| 6 | 24716795 | 0,605 |
| 6 | 24717725 | 0,605 |
| 6 | 24717820 | 0,684 |
| 6 | 24718269 | 0,684 |
| 6 | 24718322 | 0,684 |
| 6 | 24718366 | 0,684 |
| 6 | 24718562 | 0,684 |
| 6 | 24718614 | 0,684 |
| 6 | 24718620 | 0,684 |
| 6 | 24718863 | 0,605 |
| 6 | 24719026 | 0,684 |
| 6 | 24719322 | 0,684 |
| 6 | 24719423 | 0,605 |
| 6 | 24719446 | 0,684 |
| 6 | 24719548 | 0,605 |
| 6 | 24719618 | 0,605 |
| 6 | 24719820 | 0,605 |
| 6 | 24719913 | 0,605 |
| 6 | 24720179 | 0,605 |
| 6 | 24720257 | 0,605 |
| 6 | 24720276 | 0,605 |
| 6 | 24720389 | 0,684 |
| 6 | 24720452 | 0,605 |
| 6 | 24720458 | 0,684 |
| 6 | 24720896 | 0,684 |
| 6 | 24720952 | 0,605 |
| 6 | 24721301 | 0,684 |
| 6 | 24721420 | 0,684 |
| 6 | 24721468 | 0,605 |
| 6 | 24721497 | 0,684 |
| 6 | 24721811 | 0,684 |
| 6 | 24721828 | 0,684 |
| 6 | 24722099 | 0,605 |
| 6 | 24722303 | 0,605 |
| 6 | 24722509 | 0,605 |
| 6 | 24722791 | 0,605 |
| 6 | 24722959 | 0,684 |

|   |          |       |
|---|----------|-------|
| 6 | 24723123 | 0,605 |
| 6 | 24723195 | 0,605 |
| 6 | 24723231 | 0,605 |
| 6 | 24723598 | 0,684 |
| 6 | 24724354 | 0,605 |
| 6 | 24724666 | 0,684 |
| 6 | 24724999 | 0,684 |
| 6 | 24725352 | 0,605 |
| 6 | 24725389 | 0,605 |
| 6 | 24725573 | 0,605 |
| 6 | 24725634 | 0,684 |
| 6 | 24725672 | 0,605 |
| 6 | 24725711 | 0,684 |
| 6 | 24725840 | 0,684 |
| 6 | 24725987 | 0,684 |
| 6 | 24726095 | 0,605 |
| 6 | 24726334 | 0,605 |
| 6 | 24726440 | 0,605 |
| 6 | 24726470 | 0,605 |
| 6 | 24726539 | 0,605 |
| 6 | 24726617 | 0,605 |
| 6 | 24726638 | 0,605 |
| 6 | 24726710 | 0,605 |
| 6 | 24726771 | 0,605 |
| 6 | 24726963 | 0,605 |
| 6 | 24731304 | 0,605 |
| 6 | 24764269 | 0,605 |
| 6 | 24765236 | 0,684 |
| 6 | 24765281 | 0,684 |
| 6 | 24765531 | 0,684 |
| 6 | 24765596 | 0,605 |
| 6 | 24765978 | 0,684 |
| 6 | 24765995 | 0,684 |
| 6 | 24766246 | 0,684 |
| 6 | 24766710 | 0,684 |
| 6 | 24766750 | 0,684 |
| 6 | 24766801 | 0,684 |
| 6 | 24767022 | 0,605 |
| 6 | 24768331 | 0,684 |
| 6 | 24768359 | 0,605 |
| 6 | 24768360 | 0,605 |
| 6 | 24768609 | 0,684 |
| 6 | 24768620 | 0,684 |
| 6 | 24768820 | 0,684 |
| 6 | 24769501 | 0,684 |
| 6 | 24769685 | 0,684 |
| 6 | 24769733 | 0,605 |
| 6 | 24769765 | 0,605 |

|   |          |       |
|---|----------|-------|
| 6 | 24769942 | 0,605 |
| 6 | 24770035 | 0,605 |
| 6 | 24770077 | 0,605 |
| 6 | 24770157 | 0,605 |
| 6 | 24770341 | 0,605 |
| 6 | 24770745 | 0,605 |
| 6 | 24771142 | 0,605 |
| 6 | 24771289 | 0,605 |
| 6 | 24771291 | 0,605 |
| 6 | 24771400 | 0,684 |
| 6 | 24771530 | 0,605 |
| 6 | 24771596 | 0,605 |
| 6 | 24771640 | 0,605 |
| 6 | 24771711 | 0,684 |
| 6 | 24771754 | 0,605 |
| 6 | 24771786 | 0,605 |
| 6 | 24772005 | 0,605 |
| 6 | 24772225 | 0,684 |
| 6 | 24772352 | 0,684 |
| 6 | 24772455 | 0,605 |
| 6 | 24772588 | 0,684 |
| 6 | 24772733 | 0,684 |
| 6 | 24772884 | 0,684 |
| 6 | 24772885 | 0,684 |
| 6 | 24772953 | 0,684 |
| 6 | 24773139 | 0,684 |
| 6 | 24773186 | 0,684 |
| 6 | 24773214 | 0,605 |
| 6 | 24773337 | 0,684 |
| 6 | 24774170 | 0,605 |
| 6 | 24774171 | 0,605 |
| 6 | 24774516 | 0,684 |
| 6 | 24775477 | 0,605 |
| 6 | 24775487 | 0,605 |
| 6 | 24776141 | 0,684 |
| 6 | 24776631 | 0,684 |
| 6 | 24776681 | 0,684 |
| 6 | 24776693 | 0,684 |
| 6 | 24776751 | 0,684 |
| 6 | 24776963 | 0,684 |
| 6 | 24777027 | 0,605 |
| 6 | 24777113 | 0,605 |
| 6 | 24777187 | 0,605 |
| 6 | 24777310 | 0,605 |
| 6 | 24777324 | 0,605 |
| 6 | 24777398 | 0,605 |
| 6 | 24777513 | 0,605 |
| 6 | 24777554 | 0,605 |

|   |          |       |
|---|----------|-------|
| 6 | 24777566 | 0,605 |
| 6 | 24777612 | 0,605 |
| 6 | 24777632 | 0,605 |
| 6 | 24777713 | 0,684 |
| 6 | 24777730 | 0,605 |
| 6 | 24777731 | 0,605 |
| 6 | 24777747 | 0,605 |
| 6 | 24777849 | 0,605 |
| 6 | 24777874 | 0,605 |
| 6 | 24777899 | 0,605 |
| 6 | 24777909 | 0,605 |
| 6 | 24777911 | 0,605 |
| 6 | 24777924 | 0,605 |
| 6 | 24777999 | 0,605 |
| 6 | 24778005 | 0,605 |
| 6 | 24778126 | 0,605 |
| 6 | 24778601 | 0,605 |
| 6 | 24778709 | 0,605 |
| 6 | 24778726 | 0,605 |
| 6 | 24778867 | 0,605 |
| 6 | 24778928 | 0,605 |
| 6 | 24778935 | 0,605 |
| 6 | 24779108 | 0,684 |
| 6 | 24779143 | 0,684 |
| 6 | 24779207 | 0,684 |
| 6 | 24779852 | 0,684 |
| 6 | 24780020 | 0,684 |
| 6 | 24780065 | 0,684 |
| 6 | 24780126 | 0,684 |
| 6 | 24780159 | 0,684 |
| 6 | 24780368 | 0,605 |
| 6 | 24780402 | 0,605 |
| 6 | 24780801 | 0,605 |
| 6 | 24780873 | 0,684 |
| 6 | 24780890 | 0,684 |
| 6 | 24780912 | 0,684 |
| 6 | 24781028 | 0,605 |
| 6 | 24781328 | 0,684 |
| 6 | 24781392 | 0,684 |
| 6 | 24781463 | 0,684 |
| 6 | 24781959 | 0,684 |
| 6 | 24782036 | 0,684 |
| 6 | 24782074 | 0,605 |
| 6 | 24782107 | 0,684 |
| 6 | 24782206 | 0,605 |
| 6 | 24782211 | 0,605 |
| 6 | 24782234 | 0,605 |
| 6 | 24782448 | 0,605 |

|   |          |       |
|---|----------|-------|
| 6 | 24782450 | 0,684 |
| 6 | 24782471 | 0,605 |
| 6 | 24782562 | 0,605 |
| 6 | 24782643 | 0,605 |
| 6 | 24782910 | 0,684 |
| 6 | 24783029 | 0,684 |
| 6 | 24783317 | 0,605 |
| 6 | 24783411 | 0,605 |
| 6 | 24783619 | 0,605 |
| 6 | 24783620 | 0,605 |
| 6 | 24783680 | 0,605 |
| 6 | 24783960 | 0,684 |
| 6 | 24784106 | 0,684 |
| 6 | 24785017 | 0,684 |
| 6 | 24785883 | 0,605 |
| 6 | 24786613 | 0,684 |
| 6 | 24786990 | 0,684 |
| 6 | 24787287 | 0,605 |
| 6 | 24787319 | 0,684 |
| 6 | 24787416 | 0,605 |
| 6 | 24787672 | 0,605 |
| 6 | 24787708 | 0,605 |
| 6 | 24787856 | 0,684 |
| 6 | 24787947 | 0,605 |
| 6 | 24787951 | 0,605 |
| 6 | 24787953 | 0,605 |
| 6 | 24788028 | 0,605 |
| 6 | 24788061 | 0,605 |
| 6 | 24788156 | 0,605 |
| 6 | 24788196 | 0,605 |
| 6 | 24788297 | 0,605 |
| 6 | 24788322 | 0,605 |
| 6 | 24788452 | 0,605 |
| 6 | 24788587 | 0,605 |
| 6 | 24788693 | 0,605 |
| 6 | 24788714 | 0,605 |
| 6 | 24788786 | 0,605 |
| 6 | 24788816 | 0,605 |
| 6 | 24788881 | 0,605 |
| 6 | 24788882 | 0,605 |
| 6 | 24788935 | 0,605 |
| 6 | 24788942 | 0,605 |
| 6 | 24789714 | 0,605 |
| 6 | 24789908 | 0,605 |
| 6 | 24789965 | 0,605 |
| 6 | 24789966 | 0,605 |
| 6 | 24789986 | 0,605 |
| 6 | 24790128 | 0,605 |

|   |          |       |
|---|----------|-------|
| 6 | 24790156 | 0,605 |
| 6 | 24790391 | 0,605 |
| 6 | 24790474 | 0,684 |
| 6 | 24790513 | 0,684 |
| 6 | 24790562 | 0,605 |
| 6 | 24790653 | 0,605 |
| 6 | 24790877 | 0,684 |
| 6 | 24790878 | 0,684 |
| 6 | 24790968 | 0,684 |
| 6 | 24791020 | 0,605 |
| 6 | 24791021 | 0,605 |
| 6 | 24791157 | 0,684 |
| 6 | 24792100 | 0,605 |
| 6 | 24792333 | 0,605 |
| 6 | 24792340 | 0,605 |
| 6 | 24792838 | 0,605 |
| 6 | 24793070 | 0,684 |
| 6 | 24793091 | 0,684 |
| 6 | 24793182 | 0,605 |
| 6 | 24793354 | 0,684 |
| 6 | 24793625 | 0,605 |
| 6 | 24793662 | 0,605 |
| 6 | 24793915 | 0,605 |
| 6 | 24794335 | 0,605 |
| 6 | 24794488 | 0,605 |
| 6 | 24794585 | 0,684 |
| 6 | 24794958 | 0,605 |
| 6 | 24794998 | 0,605 |
| 6 | 24795319 | 0,605 |
| 6 | 24796469 | 0,605 |
| 6 | 24796569 | 0,605 |
| 6 | 24796635 | 0,684 |
| 6 | 24797140 | 0,684 |
| 6 | 24797617 | 0,684 |
| 6 | 24797944 | 0,684 |
| 6 | 24798086 | 0,684 |
| 6 | 24798535 | 0,684 |
| 6 | 24799636 | 0,684 |
| 6 | 24799830 | 0,605 |
| 6 | 24800107 | 0,605 |
| 6 | 24800274 | 0,684 |
| 6 | 24800405 | 0,684 |
| 6 | 24800907 | 0,605 |
| 6 | 24801034 | 0,684 |
| 6 | 24801146 | 0,684 |
| 6 | 24801255 | 0,684 |
| 6 | 24801305 | 0,684 |
| 6 | 24803355 | 0,684 |

|   |          |       |
|---|----------|-------|
| 6 | 24804435 | 0,605 |
| 6 | 24805587 | 0,605 |
| 6 | 24805672 | 0,605 |
| 6 | 24806067 | 0,605 |
| 6 | 24806352 | 0,605 |
| 6 | 24806463 | 0,605 |
| 6 | 24806469 | 0,684 |
| 6 | 24806521 | 0,605 |
| 6 | 24806736 | 0,684 |
| 6 | 24807278 | 0,605 |
| 6 | 24807396 | 0,605 |
| 6 | 24807645 | 0,684 |
| 6 | 24807870 | 0,605 |
| 6 | 24808013 | 0,684 |
| 6 | 24808704 | 0,605 |
| 6 | 24808918 | 0,605 |
| 6 | 24809021 | 0,684 |
| 6 | 24809073 | 0,684 |
| 6 | 24809151 | 0,684 |
| 6 | 24809342 | 0,684 |
| 6 | 24809354 | 0,684 |
| 6 | 24809355 | 0,684 |
| 6 | 24809360 | 0,684 |
| 6 | 24809364 | 0,684 |
| 6 | 24809366 | 0,684 |
| 6 | 24809397 | 0,684 |
| 6 | 24809580 | 0,605 |
| 6 | 24809662 | 0,684 |
| 6 | 24809827 | 0,605 |
| 6 | 24809936 | 0,605 |
| 6 | 24810152 | 0,684 |
| 6 | 24810681 | 0,605 |
| 6 | 24811182 | 0,684 |
| 6 | 24811219 | 0,605 |
| 6 | 24811256 | 0,684 |
| 6 | 24811305 | 0,684 |
| 6 | 24811562 | 0,684 |
| 6 | 24811671 | 0,605 |
| 6 | 24811725 | 0,605 |
| 6 | 24811731 | 0,605 |
| 6 | 24811802 | 0,605 |
| 6 | 24811878 | 0,605 |
| 6 | 24812031 | 0,605 |
| 6 | 24812173 | 0,605 |
| 6 | 24812278 | 0,605 |
| 6 | 24812495 | 0,605 |
| 6 | 24812506 | 0,605 |
| 6 | 24812597 | 0,605 |

|   |          |       |
|---|----------|-------|
| 6 | 24812764 | 0,605 |
| 6 | 24812860 | 0,684 |
| 6 | 24812906 | 0,684 |
| 6 | 24812937 | 0,684 |
| 6 | 24813022 | 0,684 |
| 6 | 24813244 | 0,684 |
| 6 | 24813639 | 0,684 |
| 6 | 24813763 | 0,605 |
| 6 | 24813869 | 0,684 |
| 6 | 24813870 | 0,684 |
| 6 | 24813893 | 0,684 |
| 6 | 24813936 | 0,684 |
| 6 | 24813937 | 0,684 |
| 6 | 24814000 | 0,684 |
| 6 | 24814199 | 0,684 |
| 6 | 24814226 | 0,605 |
| 6 | 24814473 | 0,684 |
| 6 | 24815135 | 0,605 |
| 6 | 24815176 | 0,605 |
| 6 | 24815221 | 0,605 |
| 6 | 24815243 | 0,684 |
| 6 | 24815269 | 0,605 |
| 6 | 24815751 | 0,684 |
| 6 | 24815784 | 0,684 |
| 6 | 24815836 | 0,684 |
| 6 | 24815874 | 0,684 |
| 6 | 24815946 | 0,684 |
| 6 | 24815987 | 0,684 |
| 6 | 24816111 | 0,684 |
| 6 | 24816136 | 0,684 |
| 6 | 24816424 | 0,684 |
| 6 | 24816429 | 0,684 |
| 6 | 24816637 | 0,684 |
| 6 | 24817217 | 0,605 |
| 6 | 24817222 | 0,605 |
| 6 | 24817320 | 0,605 |
| 6 | 24817354 | 0,684 |
| 6 | 24817502 | 0,605 |
| 6 | 24817623 | 0,605 |
| 6 | 24817828 | 0,605 |
| 6 | 24817879 | 0,605 |
| 6 | 24817929 | 0,605 |
| 6 | 24817936 | 0,605 |
| 6 | 24817948 | 0,605 |
| 6 | 24817949 | 0,605 |
| 6 | 24817962 | 0,605 |
| 6 | 24817964 | 0,605 |
| 6 | 24817966 | 0,605 |



|   |          |       |
|---|----------|-------|
| 6 | 24817969 | 0,605 |
| 6 | 24817970 | 0,605 |
| 6 | 24817977 | 0,605 |
| 6 | 24817984 | 0,605 |
| 6 | 24818021 | 0,605 |
| 6 | 24818024 | 0,605 |
| 6 | 24818055 | 0,605 |
| 6 | 24818190 | 0,605 |
| 6 | 24818295 | 0,605 |
| 6 | 24818297 | 0,605 |
| 6 | 24818307 | 0,605 |
| 6 | 24818528 | 0,605 |
| 6 | 24818615 | 0,605 |
| 6 | 24818696 | 0,605 |
| 6 | 24818930 | 0,684 |
| 6 | 24819038 | 0,605 |
| 6 | 24819093 | 0,605 |
| 6 | 24819142 | 0,605 |
| 6 | 24819345 | 0,605 |
| 6 | 24819409 | 0,605 |
| 6 | 24819411 | 0,605 |
| 6 | 24819815 | 0,605 |
| 6 | 24820191 | 0,684 |
| 6 | 24820348 | 0,605 |
| 6 | 24820363 | 0,605 |
| 6 | 24820374 | 0,605 |
| 6 | 24820399 | 0,605 |
| 6 | 24820438 | 0,605 |
| 6 | 24820687 | 0,605 |
| 6 | 24821172 | 0,684 |
| 6 | 24821318 | 0,684 |
| 6 | 24821319 | 0,684 |
| 6 | 24821324 | 0,605 |
| 6 | 24821336 | 0,684 |
| 6 | 24821381 | 0,684 |
| 6 | 24821864 | 0,605 |
| 6 | 24821865 | 0,605 |
| 6 | 24822184 | 0,684 |
| 6 | 24822821 | 0,605 |
| 6 | 24823301 | 0,684 |
| 6 | 24823324 | 0,684 |
| 6 | 24823395 | 0,684 |
| 6 | 24823414 | 0,684 |
| 6 | 24823452 | 0,684 |
| 6 | 24823460 | 0,684 |
| 6 | 24823583 | 0,684 |
| 6 | 24823612 | 0,684 |
| 6 | 24823711 | 0,684 |

|   |          |       |
|---|----------|-------|
| 6 | 24823750 | 0,684 |
| 6 | 24823754 | 0,684 |
| 6 | 24823841 | 0,684 |
| 6 | 24823902 | 0,684 |
| 6 | 24823913 | 0,684 |
| 6 | 24823992 | 0,684 |
| 6 | 24824143 | 0,684 |
| 6 | 24824536 | 0,684 |
| 6 | 24824590 | 0,684 |
| 6 | 24824591 | 0,684 |
| 6 | 24824622 | 0,684 |
| 6 | 24824699 | 0,684 |
| 6 | 24825189 | 0,605 |
| 6 | 24825190 | 0,605 |
| 6 | 24825241 | 0,605 |
| 6 | 24825734 | 0,684 |
| 6 | 24825802 | 0,684 |
| 6 | 24826167 | 0,605 |
| 6 | 24826377 | 0,605 |
| 6 | 24826690 | 0,605 |
| 6 | 24826761 | 0,605 |
| 6 | 24827230 | 0,605 |
| 6 | 24865851 | 0,605 |
| 6 | 24866687 | 0,684 |
| 6 | 24866898 | 0,684 |
| 6 | 24866918 | 0,684 |
| 6 | 24867143 | 0,684 |
| 6 | 24867305 | 0,684 |
| 6 | 24867894 | 0,684 |
| 6 | 24867953 | 0,684 |
| 6 | 24867955 | 0,684 |
| 6 | 24867961 | 0,684 |
| 6 | 24867981 | 0,684 |
| 6 | 24868014 | 0,684 |
| 6 | 24868137 | 0,605 |
| 6 | 24868370 | 0,605 |
| 6 | 24868385 | 0,605 |
| 6 | 24869564 | 0,684 |
| 6 | 24869818 | 0,605 |
| 6 | 24869937 | 0,684 |
| 6 | 24869947 | 0,684 |
| 6 | 24869989 | 0,684 |
| 6 | 24870070 | 0,684 |
| 6 | 24871391 | 0,605 |
| 6 | 24871403 | 0,605 |
| 6 | 24871538 | 0,605 |
| 6 | 24871587 | 0,605 |
| 6 | 24871674 | 0,605 |

|   |          |       |
|---|----------|-------|
| 6 | 24871808 | 0,605 |
| 6 | 24871858 | 0,605 |
| 6 | 24872562 | 0,605 |
| 6 | 24872716 | 0,684 |
| 6 | 24872847 | 0,684 |
| 6 | 24872961 | 0,605 |
| 6 | 24873030 | 0,684 |
| 6 | 24873035 | 0,684 |
| 6 | 24873118 | 0,684 |
| 6 | 24873345 | 0,684 |
| 6 | 24873626 | 0,605 |
| 6 | 24874371 | 0,605 |
| 6 | 24874394 | 0,605 |
| 6 | 24874894 | 0,684 |
| 6 | 24874945 | 0,605 |
| 6 | 24874953 | 0,605 |
| 6 | 24875133 | 0,605 |
| 6 | 24875457 | 0,605 |
| 6 | 24875806 | 0,684 |
| 6 | 24876057 | 0,684 |
| 6 | 24876930 | 0,605 |
| 6 | 24877182 | 0,605 |
| 6 | 24877351 | 0,605 |
| 6 | 24877376 | 0,605 |
| 6 | 24877377 | 0,605 |
| 6 | 24877593 | 0,605 |
| 6 | 24877601 | 0,605 |
| 6 | 24877614 | 0,605 |
| 6 | 24877628 | 0,605 |
| 6 | 24877833 | 0,684 |
| 6 | 24877923 | 0,605 |
| 6 | 24878006 | 0,684 |
| 6 | 24878107 | 0,605 |
| 6 | 24878287 | 0,605 |
| 6 | 24878349 | 0,684 |
| 6 | 24878376 | 0,684 |
| 6 | 24878377 | 0,684 |
| 6 | 24878784 | 0,684 |
| 6 | 24879009 | 0,605 |
| 6 | 24886337 | 0,605 |
| 6 | 24886426 | 0,605 |
| 6 | 24886632 | 0,605 |
| 6 | 24886749 | 0,605 |
| 6 | 24886899 | 0,684 |
| 6 | 24887059 | 0,605 |
| 6 | 24887121 | 0,605 |
| 6 | 24887543 | 0,684 |
| 6 | 24887727 | 0,684 |

|   |          |       |
|---|----------|-------|
| 6 | 24887772 | 0,684 |
| 6 | 24888000 | 0,684 |
| 6 | 24888180 | 0,684 |
| 6 | 24888411 | 0,684 |
| 6 | 24888768 | 0,605 |
| 6 | 24888955 | 0,605 |
| 6 | 24889258 | 0,605 |
| 6 | 24889451 | 0,684 |
| 6 | 24889651 | 0,684 |
| 6 | 24889736 | 0,684 |
| 6 | 24889742 | 0,605 |
| 6 | 24889787 | 0,684 |
| 6 | 24890540 | 0,684 |
| 6 | 24890677 | 0,684 |
| 6 | 24890682 | 0,684 |
| 6 | 24890754 | 0,684 |
| 6 | 24890757 | 0,684 |
| 6 | 24890766 | 0,684 |
| 6 | 24890773 | 0,684 |
| 6 | 24890837 | 0,684 |
| 6 | 24890848 | 0,684 |
| 6 | 24891018 | 0,684 |
| 6 | 24891303 | 0,605 |
| 6 | 24891425 | 0,684 |
| 6 | 24891592 | 0,605 |
| 6 | 24891631 | 0,605 |
| 6 | 24891635 | 0,605 |
| 6 | 24891642 | 0,605 |
| 6 | 24891818 | 0,605 |
| 6 | 24891921 | 0,605 |
| 6 | 24892023 | 0,605 |
| 6 | 24892455 | 0,605 |
| 6 | 24892636 | 0,605 |
| 6 | 24892840 | 0,684 |
| 6 | 24892961 | 0,684 |
| 6 | 24893084 | 0,605 |
| 6 | 24893400 | 0,605 |
| 6 | 24893567 | 0,605 |
| 6 | 24893643 | 0,605 |
| 6 | 24893745 | 0,605 |
| 6 | 24893915 | 0,684 |
| 6 | 24894070 | 0,684 |
| 6 | 24894114 | 0,605 |
| 6 | 24894369 | 0,684 |
| 6 | 24894390 | 0,684 |
| 6 | 24894403 | 0,684 |
| 6 | 24894404 | 0,684 |
| 6 | 24894406 | 0,684 |

|   |          |       |
|---|----------|-------|
| 6 | 24894408 | 0,684 |
| 6 | 24894666 | 0,684 |
| 6 | 24894683 | 0,684 |
| 6 | 24895682 | 0,684 |
| 6 | 24895716 | 0,684 |
| 6 | 24895803 | 0,684 |
| 6 | 24895806 | 0,684 |
| 6 | 24895972 | 0,684 |
| 6 | 24896031 | 0,684 |
| 6 | 24896053 | 0,684 |
| 6 | 24896054 | 0,684 |
| 6 | 24896129 | 0,684 |
| 6 | 24896360 | 0,684 |
| 6 | 24910731 | 0,684 |
| 6 | 24910733 | 0,684 |
| 6 | 24910774 | 0,684 |
| 6 | 24910790 | 0,684 |
| 6 | 24910879 | 0,684 |
| 6 | 24911462 | 0,684 |
| 6 | 24911650 | 0,684 |
| 6 | 24911660 | 0,684 |
| 6 | 24911725 | 0,684 |
| 6 | 24911739 | 0,684 |
| 6 | 24911755 | 0,684 |
| 6 | 24911926 | 0,684 |
| 6 | 24912458 | 0,684 |
| 6 | 24912490 | 0,684 |
| 6 | 24912507 | 0,684 |
| 6 | 24912656 | 0,684 |
| 6 | 24912666 | 0,684 |
| 6 | 24912855 | 0,684 |
| 6 | 24912862 | 0,684 |
| 6 | 24913014 | 0,684 |
| 6 | 24913039 | 0,684 |
| 6 | 24913303 | 0,684 |
| 6 | 24949153 | 0,684 |
| 6 | 24953279 | 0,684 |
| 6 | 24954050 | 0,684 |
| 6 | 24954110 | 0,684 |
| 6 | 25077997 | 0,684 |
| 6 | 25078089 | 0,684 |
| 6 | 25078286 | 0,684 |
| 6 | 25081105 | 0,684 |
| 6 | 25081884 | 0,684 |
| 6 | 25081935 | 0,684 |
| 6 | 25082010 | 0,684 |
| 6 | 25082046 | 0,684 |
| 6 | 25089050 | 0,684 |

|   |          |       |
|---|----------|-------|
| 6 | 25089856 | 0,684 |
| 6 | 25089868 | 0,684 |
| 6 | 25089922 | 0,684 |
| 6 | 25090048 | 0,684 |
| 6 | 25090184 | 0,684 |
| 6 | 25090325 | 0,684 |
| 6 | 25090448 | 0,684 |
| 6 | 25090451 | 0,684 |
| 6 | 25090452 | 0,684 |
| 6 | 25090620 | 0,684 |
| 6 | 25090683 | 0,684 |
| 6 | 25096043 | 0,684 |
| 6 | 25217711 | 0,684 |
| 6 | 25217723 | 0,684 |
| 6 | 25217818 | 0,684 |
| 6 | 25217927 | 0,684 |
| 6 | 25241780 | 0,684 |
| 6 | 25241794 | 0,684 |
| 6 | 25242732 | 0,684 |
| 6 | 25242812 | 0,684 |
| 6 | 25243594 | 0,684 |
| 6 | 25243959 | 0,684 |
| 6 | 25244233 | 0,684 |
| 6 | 25244522 | 0,684 |
| 6 | 25244723 | 0,684 |
| 6 | 25245199 | 0,684 |
| 6 | 25246463 | 0,684 |
| 6 | 25246475 | 0,684 |
| 6 | 25246509 | 0,684 |
| 6 | 25246774 | 0,684 |
| 6 | 25246953 | 0,684 |
| 6 | 25247164 | 0,684 |
| 6 | 25247165 | 0,684 |
| 6 | 25254353 | 0,684 |
| 6 | 25255117 | 0,684 |
| 6 | 25255259 | 0,684 |
| 6 | 25257957 | 0,684 |
| 6 | 25307621 | 0,684 |
| 6 | 25307672 | 0,684 |
| 6 | 25307764 | 0,684 |
| 6 | 25307962 | 0,684 |
| 6 | 25307969 | 0,684 |
| 6 | 25308117 | 0,684 |
| 6 | 25308180 | 0,684 |
| 6 | 25308352 | 0,684 |
| 6 | 25308471 | 0,684 |
| 6 | 25308617 | 0,684 |
| 6 | 25308834 | 0,684 |

|   |          |       |
|---|----------|-------|
| 6 | 25309046 | 0,684 |
| 6 | 25309189 | 0,684 |
| 6 | 25309264 | 0,684 |
| 6 | 25309396 | 0,684 |
| 6 | 25309654 | 0,684 |
| 6 | 25311782 | 0,684 |
| 6 | 25312026 | 0,684 |
| 6 | 25312992 | 0,684 |
| 6 | 25314420 | 0,684 |
| 6 | 25314458 | 0,684 |
| 6 | 25314459 | 0,684 |
| 6 | 25314472 | 0,684 |
| 6 | 25316054 | 0,684 |
| 6 | 25316086 | 0,684 |
| 6 | 25316276 | 0,684 |
| 6 | 25317023 | 0,684 |
| 6 | 25317204 | 0,684 |
| 6 | 25317733 | 0,684 |
| 6 | 25317808 | 0,684 |
| 6 | 25318564 | 0,684 |
| 6 | 25319022 | 0,684 |
| 6 | 25319031 | 0,684 |
| 6 | 25319039 | 0,763 |
| 6 | 25319088 | 0,711 |
| 6 | 25319135 | 0,737 |
| 6 | 25319284 | 0,737 |
| 6 | 25319362 | 0,711 |
| 6 | 25319412 | 0,711 |
| 6 | 25319565 | 0,711 |
| 6 | 25319767 | 0,737 |
| 6 | 25319874 | 0,500 |
| 6 | 25320126 | 0,684 |
| 6 | 25320515 | 0,684 |
| 6 | 25320860 | 0,711 |
| 6 | 25320884 | 0,500 |
| 6 | 25321328 | 0,711 |
| 6 | 25321760 | 0,526 |
| 6 | 25321772 | 0,711 |
| 6 | 25321852 | 0,684 |
| 6 | 25321873 | 0,711 |
| 6 | 25321891 | 0,711 |
| 6 | 25321994 | 0,684 |
| 6 | 25322034 | 0,763 |
| 6 | 25322082 | 0,763 |
| 6 | 25322189 | 0,789 |
| 6 | 25322191 | 0,763 |
| 6 | 25322210 | 0,789 |
| 6 | 25322212 | 0,763 |

|   |          |       |
|---|----------|-------|
| 6 | 25322241 | 0,684 |
| 6 | 25322318 | 0,711 |
| 6 | 25322363 | 0,684 |
| 6 | 25322460 | 0,526 |
| 6 | 25322820 | 0,763 |
| 6 | 25322930 | 0,789 |
| 6 | 25322971 | 0,500 |
| 6 | 25323271 | 0,711 |
| 6 | 25323284 | 0,711 |
| 6 | 25323290 | 0,789 |
| 6 | 25323304 | 0,711 |
| 6 | 25323313 | 0,684 |
| 6 | 25323327 | 0,737 |
| 6 | 25323403 | 0,684 |
| 6 | 25323407 | 0,500 |
| 6 | 25323457 | 0,684 |
| 6 | 25323503 | 0,684 |
| 6 | 25323576 | 0,684 |
| 6 | 25323584 | 0,500 |
| 6 | 25323713 | 0,684 |
| 6 | 25323865 | 0,684 |
| 6 | 25324178 | 0,684 |
| 6 | 25324358 | 0,684 |
| 6 | 25324499 | 0,500 |
| 6 | 25325165 | 0,684 |
| 6 | 25325465 | 0,684 |
| 6 | 25325699 | 0,526 |
| 6 | 25325843 | 0,526 |
| 6 | 25326073 | 0,684 |
| 6 | 25326258 | 0,684 |
| 6 | 25326289 | 0,684 |
| 6 | 25326713 | 0,684 |
| 6 | 25327257 | 0,500 |
| 6 | 25341408 | 0,684 |
| 6 | 25341444 | 0,684 |
| 6 | 25341497 | 0,684 |
| 6 | 25341671 | 0,684 |
| 6 | 25341682 | 0,684 |
| 6 | 25341861 | 0,684 |
| 6 | 25342363 | 0,684 |
| 6 | 25342572 | 0,684 |
| 6 | 25342638 | 0,526 |
| 6 | 25342717 | 0,500 |
| 6 | 25342941 | 0,684 |
| 6 | 25343006 | 0,684 |
| 6 | 25343051 | 0,684 |
| 6 | 25343071 | 0,684 |
| 6 | 25343181 | 0,684 |



|   |          |       |
|---|----------|-------|
| 6 | 25343687 | 0,684 |
| 6 | 25343950 | 0,684 |
| 6 | 25344113 | 0,684 |
| 6 | 25344157 | 0,526 |
| 6 | 25345281 | 0,737 |
| 6 | 25348780 | 0,684 |
| 6 | 25357329 | 0,684 |
| 6 | 25357356 | 0,684 |
| 6 | 25357423 | 0,684 |
| 6 | 25357434 | 0,684 |
| 6 | 25357814 | 0,684 |
| 6 | 25368545 | 0,684 |
| 6 | 25370937 | 0,684 |
| 6 | 25372655 | 0,684 |
| 6 | 25373261 | 0,684 |
| 6 | 25374391 | 0,684 |
| 6 | 25374411 | 0,684 |
| 6 | 25375832 | 0,684 |
| 6 | 25376515 | 0,684 |
| 6 | 25376955 | 0,684 |
| 6 | 25377386 | 0,684 |
| 6 | 25377503 | 0,684 |
| 6 | 25385919 | 0,684 |
| 6 | 25386015 | 0,684 |
| 6 | 25386169 | 0,684 |
| 6 | 25386291 | 0,684 |
| 6 | 25387529 | 0,684 |
| 6 | 25387611 | 0,684 |
| 6 | 25387615 | 0,684 |
| 6 | 25387619 | 0,684 |
| 6 | 25387631 | 0,684 |
| 6 | 25388073 | 0,684 |
| 6 | 25388089 | 0,684 |
| 6 | 25388329 | 0,684 |
| 6 | 25395143 | 0,684 |
| 6 | 25395429 | 0,684 |
| 6 | 25396926 | 0,684 |
| 6 | 25398373 | 0,684 |
| 6 | 25400953 | 0,684 |
| 6 | 25400958 | 0,684 |
| 6 | 25400965 | 0,684 |
| 6 | 25401484 | 0,684 |
| 6 | 25402552 | 0,684 |
| 6 | 25402651 | 0,684 |
| 6 | 25402747 | 0,684 |
| 6 | 25405238 | 0,684 |
| 6 | 25405324 | 0,684 |
| 6 | 25407229 | 0,684 |

|   |          |       |
|---|----------|-------|
| 6 | 25407242 | 0,684 |
| 6 | 25407435 | 0,684 |
| 6 | 25407727 | 0,684 |
| 6 | 25408199 | 0,684 |
| 6 | 25408969 | 0,684 |
| 6 | 25408991 | 0,684 |
| 6 | 25409032 | 0,684 |
| 6 | 25410671 | 0,684 |
| 6 | 25410784 | 0,684 |
| 6 | 25427464 | 0,684 |
| 6 | 25427508 | 0,684 |
| 6 | 25427510 | 0,684 |
| 6 | 25427525 | 0,684 |
| 6 | 25427536 | 0,684 |
| 6 | 25428009 | 0,684 |
| 6 | 25428117 | 0,684 |
| 6 | 25430472 | 0,684 |
| 6 | 25439205 | 0,684 |
| 6 | 16945167 | 0,508 |
| 6 | 16945417 | 0,508 |
| 6 | 17521770 | 0,584 |
| 6 | 17521917 | 0,584 |
| 6 | 17522191 | 0,584 |
| 6 | 24952918 | 0,500 |
| 6 | 25078330 | 0,500 |
| 6 | 25078643 | 0,500 |
| 6 | 25078679 | 0,500 |
| 6 | 25078854 | 0,500 |
| 6 | 25078894 | 0,500 |
| 6 | 25079110 | 0,500 |
| 6 | 25079161 | 0,500 |
| 6 | 25079203 | 0,500 |
| 6 | 25079282 | 0,500 |
| 6 | 25079402 | 0,500 |
| 6 | 25079495 | 0,500 |
| 6 | 25079541 | 0,500 |
| 6 | 25080802 | 0,500 |
| 6 | 25080855 | 0,500 |
| 6 | 25080922 | 0,500 |
| 6 | 25080951 | 0,500 |
| 6 | 25080994 | 0,500 |
| 6 | 25081080 | 0,500 |
| 6 | 25081087 | 0,500 |
| 6 | 25081096 | 0,500 |
| 6 | 25081102 | 0,500 |
| 6 | 25081103 | 0,500 |
| 6 | 25081117 | 0,500 |
| 6 | 25081134 | 0,500 |

|   |          |       |
|---|----------|-------|
| 6 | 25081231 | 0,500 |
| 6 | 25081242 | 0,500 |
| 6 | 25081269 | 0,500 |
| 6 | 25081275 | 0,500 |
| 6 | 25081592 | 0,500 |
| 6 | 25081888 | 0,500 |
| 6 | 25088112 | 0,500 |
| 6 | 25088202 | 0,500 |
| 6 | 25088688 | 0,500 |
| 6 | 25088918 | 0,500 |
| 6 | 25089169 | 0,500 |
| 6 | 25090241 | 0,500 |
| 6 | 25090355 | 0,500 |
| 6 | 25090475 | 0,500 |
| 6 | 25090555 | 0,500 |
| 6 | 25090693 | 0,500 |
| 6 | 25091386 | 0,500 |
| 6 | 25092818 | 0,500 |
| 6 | 25092849 | 0,500 |
| 6 | 25093278 | 0,500 |
| 6 | 25094614 | 0,500 |
| 6 | 25094711 | 0,500 |
| 6 | 25094745 | 0,500 |
| 6 | 25243749 | 0,500 |
| 6 | 25245025 | 0,500 |
| 6 | 25246140 | 0,500 |
| 6 | 25246938 | 0,500 |
| 6 | 25251749 | 0,500 |
| 6 | 25252421 | 0,500 |
| 6 | 25252424 | 0,500 |
| 6 | 25253557 | 0,500 |
| 6 | 25254085 | 0,500 |
| 6 | 25254385 | 0,500 |
| 6 | 25255135 | 0,500 |
| 6 | 25255155 | 0,500 |
| 6 | 25255226 | 0,500 |
| 6 | 25255538 | 0,500 |
| 6 | 25258545 | 0,500 |
| 6 | 25258806 | 0,500 |
| 6 | 25312708 | 0,500 |
| 6 | 25314962 | 0,500 |
| 6 | 25314991 | 0,500 |
| 6 | 25315413 | 0,500 |
| 6 | 25315626 | 0,500 |
| 6 | 25316018 | 0,500 |
| 6 | 25316635 | 0,500 |
| 6 | 25316698 | 0,500 |
| 6 | 25316995 | 0,500 |

|   |          |       |
|---|----------|-------|
| 6 | 25317076 | 0,500 |
| 6 | 25317163 | 0,500 |
| 6 | 25317335 | 0,500 |
| 6 | 25319455 | 0,500 |
| 6 | 25319756 | 0,500 |
| 6 | 25320270 | 0,500 |
| 6 | 25320310 | 0,500 |
| 6 | 25320619 | 0,500 |
| 6 | 25320655 | 0,500 |
| 6 | 25320844 | 0,500 |
| 6 | 25320945 | 0,500 |
| 6 | 25321611 | 0,500 |
| 6 | 25321849 | 0,500 |
| 6 | 25322164 | 0,500 |
| 6 | 25322213 | 0,500 |
| 6 | 25322813 | 0,500 |
| 6 | 25323269 | 0,500 |
| 6 | 25323650 | 0,500 |
| 6 | 25323911 | 0,500 |
| 6 | 25324116 | 0,500 |
| 6 | 25324677 | 0,500 |
| 6 | 25325847 | 0,500 |
| 6 | 25326511 | 0,500 |
| 6 | 25327466 | 0,500 |
| 6 | 25327543 | 0,500 |
| 6 | 25327567 | 0,500 |
| 6 | 25327631 | 0,500 |
| 6 | 25327708 | 0,500 |
| 6 | 25327976 | 0,500 |
| 6 | 25330052 | 0,500 |
| 6 | 25330206 | 0,500 |
| 6 | 25330218 | 0,500 |
| 6 | 25330269 | 0,500 |
| 6 | 25330389 | 0,500 |
| 6 | 25330448 | 0,500 |
| 6 | 25330471 | 0,500 |
| 6 | 25330503 | 0,500 |
| 6 | 25330543 | 0,500 |
| 6 | 25330654 | 0,500 |
| 6 | 25330664 | 0,500 |
| 6 | 25330679 | 0,500 |
| 6 | 25339738 | 0,500 |
| 6 | 25339769 | 0,500 |
| 6 | 25340172 | 0,500 |
| 6 | 25340765 | 0,500 |
| 6 | 25340805 | 0,500 |
| 6 | 25341447 | 0,500 |
| 6 | 25344936 | 0,500 |

|   |          |       |
|---|----------|-------|
| 6 | 25345112 | 0,500 |
| 6 | 25345178 | 0,500 |
| 6 | 25345311 | 0,500 |
| 6 | 25345312 | 0,500 |
| 6 | 25345328 | 0,500 |
| 6 | 25345384 | 0,500 |
| 6 | 25345388 | 0,500 |
| 6 | 25345392 | 0,500 |
| 6 | 25345453 | 0,500 |
| 6 | 25345612 | 0,500 |
| 6 | 25345643 | 0,500 |
| 6 | 25345833 | 0,500 |
| 6 | 25345885 | 0,500 |
| 6 | 25345968 | 0,500 |
| 6 | 25346023 | 0,500 |
| 6 | 25346131 | 0,500 |
| 6 | 25346727 | 0,500 |
| 6 | 25348178 | 0,500 |
| 6 | 25348482 | 0,500 |
| 6 | 25348502 | 0,500 |
| 6 | 25348698 | 0,500 |
| 6 | 25357717 | 0,500 |
| 6 | 25357782 | 0,500 |
| 6 | 25357784 | 0,500 |
| 6 | 25368596 | 0,500 |
| 6 | 25370519 | 0,500 |
| 6 | 25370773 | 0,500 |
| 6 | 25372078 | 0,500 |
| 6 | 25372719 | 0,500 |
| 6 | 25372912 | 0,500 |
| 6 | 25374581 | 0,500 |
| 6 | 25374760 | 0,500 |
| 6 | 25377028 | 0,500 |
| 6 | 25377976 | 0,500 |
| 6 | 25378133 | 0,500 |
| 6 | 25378180 | 0,500 |
| 6 | 25378395 | 0,500 |
| 6 | 25387396 | 0,500 |
| 6 | 25395336 | 0,500 |
| 6 | 25395685 | 0,500 |
| 6 | 25396132 | 0,500 |
| 6 | 25396402 | 0,500 |
| 6 | 25396897 | 0,500 |
| 6 | 25397019 | 0,500 |
| 6 | 25397086 | 0,500 |
| 6 | 25397225 | 0,500 |
| 6 | 25397589 | 0,500 |
| 6 | 25397653 | 0,500 |

|   |          |       |
|---|----------|-------|
| 6 | 25397780 | 0,500 |
| 6 | 25397798 | 0,500 |
| 6 | 25397814 | 0,500 |
| 6 | 25397815 | 0,500 |
| 6 | 25398251 | 0,500 |
| 6 | 25398316 | 0,500 |
| 6 | 25398396 | 0,500 |
| 6 | 25398576 | 0,500 |
| 6 | 25400996 | 0,500 |
| 6 | 25400997 | 0,500 |
| 6 | 25401065 | 0,500 |
| 6 | 25401353 | 0,500 |
| 6 | 25401470 | 0,500 |
| 6 | 25401665 | 0,500 |
| 6 | 25402349 | 0,500 |
| 6 | 25402391 | 0,500 |
| 6 | 25405090 | 0,500 |
| 6 | 25405302 | 0,500 |
| 6 | 25405325 | 0,500 |
| 6 | 25405389 | 0,500 |
| 6 | 25405423 | 0,500 |
| 6 | 25405517 | 0,500 |
| 6 | 25406033 | 0,500 |
| 6 | 25406079 | 0,500 |
| 6 | 25407014 | 0,500 |
| 6 | 25407033 | 0,500 |
| 6 | 25407351 | 0,500 |
| 6 | 25407741 | 0,500 |
| 6 | 25408386 | 0,500 |
| 6 | 25408802 | 0,500 |
| 6 | 25410245 | 0,500 |
| 6 | 25410383 | 0,500 |
| 6 | 25415470 | 0,500 |
| 6 | 25415647 | 0,500 |
| 6 | 25427907 | 0,500 |
| 6 | 25427961 | 0,500 |
| 6 | 25430569 | 0,500 |
| 6 | 25438116 | 0,500 |
| 6 | 16934444 | 0,553 |
| 6 | 16934494 | 0,579 |
| 6 | 16934749 | 0,632 |
| 6 | 16936216 | 0,553 |
| 6 | 16936263 | 0,872 |
| 6 | 16936590 | 0,846 |
| 6 | 16937668 | 0,872 |
| 6 | 16940710 | 0,872 |
| 6 | 16941003 | 0,872 |
| 6 | 16941579 | 0,846 |

|   |          |       |
|---|----------|-------|
| 6 | 16944642 | 0,504 |
| 6 | 16944815 | 0,530 |
| 6 | 16946528 | 0,530 |
| 6 | 16950404 | 0,500 |
| 6 | 16951088 | 0,500 |
| 6 | 16951467 | 0,846 |
| 6 | 16952058 | 0,872 |
| 6 | 16953428 | 0,820 |
| 6 | 16953617 | 0,526 |
| 6 | 16953996 | 0,872 |
| 6 | 16954457 | 0,767 |
| 6 | 16954624 | 0,793 |
| 6 | 16954633 | 0,846 |
| 6 | 16954978 | 0,846 |
| 6 | 16956274 | 0,846 |
| 6 | 16956869 | 0,872 |
| 6 | 16957246 | 0,872 |
| 6 | 16957747 | 0,846 |
| 6 | 16958850 | 0,872 |
| 6 | 16959017 | 0,846 |
| 6 | 16959818 | 0,846 |
| 6 | 16959927 | 0,872 |
| 6 | 16960165 | 0,846 |
| 6 | 16960198 | 0,557 |
| 6 | 16961454 | 0,504 |
| 6 | 16961599 | 0,793 |
| 6 | 16961643 | 0,872 |
| 6 | 17023529 | 0,716 |
| 6 | 17023570 | 0,716 |
| 6 | 17023614 | 0,716 |
| 6 | 17023629 | 0,716 |
| 6 | 17023666 | 0,716 |
| 6 | 17023671 | 0,716 |
| 6 | 17023676 | 0,716 |
| 6 | 17023682 | 0,716 |
| 6 | 17024213 | 0,716 |
| 6 | 17026502 | 0,716 |
| 6 | 17027269 | 0,716 |
| 6 | 17027274 | 0,716 |
| 6 | 17027319 | 0,716 |
| 6 | 17027384 | 0,716 |
| 6 | 17027570 | 0,716 |
| 6 | 17029305 | 0,716 |
| 6 | 17029330 | 0,557 |
| 6 | 17029399 | 0,716 |
| 6 | 17029432 | 0,716 |
| 6 | 17032597 | 0,716 |
| 6 | 17032833 | 0,716 |

|   |          |       |
|---|----------|-------|
| 6 | 17032936 | 0,716 |
| 6 | 17033803 | 0,716 |
| 6 | 17033869 | 0,716 |
| 6 | 17033870 | 0,716 |
| 6 | 17034007 | 0,716 |
| 6 | 17034020 | 0,716 |
| 6 | 17034032 | 0,716 |
| 6 | 17034034 | 0,716 |
| 6 | 17034045 | 0,716 |
| 6 | 17034072 | 0,716 |
| 6 | 17034073 | 0,716 |
| 6 | 17034143 | 0,716 |
| 6 | 17034364 | 0,716 |
| 6 | 17034865 | 0,716 |
| 6 | 17035107 | 0,716 |
| 6 | 17035518 | 0,716 |
| 6 | 17035801 | 0,557 |
| 6 | 17035817 | 0,716 |
| 6 | 17036211 | 0,716 |
| 6 | 17036414 | 0,557 |
| 6 | 17036433 | 0,557 |
| 6 | 17036529 | 0,557 |
| 6 | 17036604 | 0,557 |
| 6 | 17036643 | 0,716 |
| 6 | 17036645 | 0,716 |
| 6 | 17037384 | 0,716 |
| 6 | 17037552 | 0,557 |
| 6 | 17037579 | 0,557 |
| 6 | 17037812 | 0,716 |
| 6 | 17038334 | 0,716 |
| 6 | 17039112 | 0,716 |
| 6 | 17039645 | 0,716 |
| 6 | 17039739 | 0,716 |
| 6 | 17039788 | 0,716 |
| 6 | 17041222 | 0,716 |
| 6 | 17041317 | 0,557 |
| 6 | 17041824 | 0,716 |
| 6 | 17042440 | 0,716 |
| 6 | 17042812 | 0,716 |
| 6 | 17043311 | 0,716 |
| 6 | 17043532 | 0,716 |
| 6 | 17046540 | 0,716 |
| 6 | 17046672 | 0,716 |
| 6 | 17047048 | 0,716 |
| 6 | 17047569 | 0,716 |
| 6 | 17047715 | 0,716 |
| 6 | 17047858 | 0,557 |
| 6 | 17048330 | 0,716 |



|   |          |       |
|---|----------|-------|
| 6 | 17048451 | 0,557 |
| 6 | 17048868 | 0,557 |
| 6 | 17048882 | 0,557 |
| 6 | 17048906 | 0,716 |
| 6 | 17048951 | 0,716 |
| 6 | 17048961 | 0,557 |
| 6 | 17049044 | 0,557 |
| 6 | 17049529 | 0,557 |
| 6 | 17049530 | 0,716 |
| 6 | 17049921 | 0,716 |
| 6 | 17050434 | 0,557 |
| 6 | 17050522 | 0,557 |
| 6 | 17050690 | 0,557 |
| 6 | 17050809 | 0,557 |
| 6 | 17050812 | 0,557 |
| 6 | 17050818 | 0,557 |
| 6 | 17050952 | 0,557 |
| 6 | 17051129 | 0,557 |
| 6 | 17051500 | 0,557 |
| 6 | 17052031 | 0,557 |
| 6 | 17052186 | 0,716 |
| 6 | 17052297 | 0,557 |
| 6 | 17052448 | 0,716 |
| 6 | 17052628 | 0,557 |
| 6 | 17052641 | 0,557 |
| 6 | 17052697 | 0,557 |
| 6 | 17053270 | 0,716 |
| 6 | 17053906 | 0,557 |
| 6 | 17054285 | 0,557 |
| 6 | 17054543 | 0,557 |
| 6 | 17054566 | 0,716 |
| 6 | 17054569 | 0,716 |
| 6 | 17054618 | 0,716 |
| 6 | 17054638 | 0,716 |
| 6 | 17054761 | 0,716 |
| 6 | 17054778 | 0,557 |
| 6 | 17054849 | 0,716 |
| 6 | 17055226 | 0,557 |
| 6 | 17055262 | 0,716 |
| 6 | 17055694 | 0,716 |
| 6 | 17055754 | 0,716 |
| 6 | 17055755 | 0,716 |
| 6 | 17056016 | 0,716 |
| 6 | 17058313 | 0,716 |
| 6 | 17058457 | 0,716 |
| 6 | 17058600 | 0,716 |
| 6 | 17058671 | 0,716 |
| 6 | 17058672 | 0,716 |

|   |          |       |
|---|----------|-------|
| 6 | 17058688 | 0,716 |
| 6 | 17058780 | 0,716 |
| 6 | 17060029 | 0,716 |
| 6 | 17060703 | 0,716 |
| 6 | 17060717 | 0,716 |
| 6 | 17060896 | 0,716 |
| 6 | 17061220 | 0,716 |
| 6 | 17061283 | 0,716 |
| 6 | 17061340 | 0,716 |
| 6 | 17061395 | 0,716 |
| 6 | 17061404 | 0,716 |
| 6 | 17061412 | 0,716 |
| 6 | 17061483 | 0,716 |
| 6 | 17061587 | 0,716 |
| 6 | 17061770 | 0,716 |
| 6 | 17062823 | 0,716 |
| 6 | 17062845 | 0,716 |
| 6 | 17062875 | 0,716 |
| 6 | 17062989 | 0,716 |
| 6 | 17063002 | 0,716 |
| 6 | 17063059 | 0,716 |
| 6 | 17063295 | 0,716 |
| 6 | 17063359 | 0,716 |
| 6 | 17063719 | 0,716 |
| 6 | 17063900 | 0,716 |
| 6 | 17063992 | 0,716 |
| 6 | 17064065 | 0,716 |
| 6 | 17064248 | 0,716 |
| 6 | 17064257 | 0,716 |
| 6 | 17064268 | 0,716 |
| 6 | 17065483 | 0,716 |
| 6 | 17065678 | 0,716 |
| 6 | 17065723 | 0,716 |
| 6 | 17066497 | 0,716 |
| 6 | 17066620 | 0,716 |
| 6 | 17066663 | 0,716 |
| 6 | 17066904 | 0,716 |
| 6 | 17067709 | 0,557 |
| 6 | 17068664 | 0,716 |
| 6 | 17068719 | 0,557 |
| 6 | 17068817 | 0,557 |
| 6 | 17070627 | 0,557 |
| 6 | 17070694 | 0,716 |
| 6 | 17070762 | 0,716 |
| 6 | 17070769 | 0,716 |
| 6 | 17070780 | 0,557 |
| 6 | 17070839 | 0,716 |
| 6 | 17070884 | 0,716 |

|   |          |       |
|---|----------|-------|
| 6 | 17071503 | 0,716 |
| 6 | 17071602 | 0,557 |
| 6 | 17071633 | 0,716 |
| 6 | 17071663 | 0,557 |
| 6 | 17072036 | 0,716 |
| 6 | 17072369 | 0,557 |
| 6 | 17073131 | 0,557 |
| 6 | 17073216 | 0,557 |
| 6 | 17073318 | 0,716 |
| 6 | 17073337 | 0,716 |
| 6 | 17073340 | 0,716 |
| 6 | 17073427 | 0,716 |
| 6 | 17073642 | 0,557 |
| 6 | 17073931 | 0,716 |
| 6 | 17074425 | 0,557 |
| 6 | 17074653 | 0,557 |
| 6 | 17074751 | 0,557 |
| 6 | 17074794 | 0,716 |
| 6 | 17074918 | 0,716 |
| 6 | 17074939 | 0,716 |
| 6 | 17075192 | 0,716 |
| 6 | 17075407 | 0,716 |
| 6 | 17075535 | 0,716 |
| 6 | 17075562 | 0,557 |
| 6 | 17075952 | 0,716 |
| 6 | 17076413 | 0,716 |
| 6 | 17077527 | 0,716 |
| 6 | 17077655 | 0,716 |
| 6 | 17077732 | 0,557 |
| 6 | 17077998 | 0,716 |
| 6 | 17078250 | 0,716 |
| 6 | 17079552 | 0,716 |
| 6 | 17079998 | 0,716 |
| 6 | 17080019 | 0,716 |
| 6 | 17080024 | 0,716 |
| 6 | 17080027 | 0,716 |
| 6 | 17081003 | 0,716 |
| 6 | 17082827 | 0,716 |
| 6 | 17082832 | 0,716 |
| 6 | 17082880 | 0,716 |
| 6 | 17082907 | 0,716 |
| 6 | 17083437 | 0,716 |
| 6 | 17083440 | 0,716 |
| 6 | 17083647 | 0,716 |
| 6 | 17083880 | 0,716 |
| 6 | 17084076 | 0,716 |
| 6 | 17084090 | 0,716 |
| 6 | 17084876 | 0,716 |

|   |          |       |
|---|----------|-------|
| 6 | 17085020 | 0,716 |
| 6 | 17085612 | 0,716 |
| 6 | 17085627 | 0,716 |
| 6 | 17091935 | 0,716 |
| 6 | 17123405 | 0,716 |
| 6 | 17123560 | 0,557 |
| 6 | 17140970 | 0,716 |
| 6 | 17141067 | 0,716 |
| 6 | 17141259 | 0,716 |
| 6 | 17141303 | 0,716 |
| 6 | 17141531 | 0,716 |
| 6 | 17141809 | 0,716 |
| 6 | 17143651 | 0,716 |
| 6 | 17145150 | 0,716 |
| 6 | 17146235 | 0,716 |
| 6 | 17149176 | 0,716 |
| 6 | 17149337 | 0,716 |
| 6 | 17150065 | 0,716 |
| 6 | 17150144 | 0,716 |
| 6 | 17150290 | 0,716 |
| 6 | 17150303 | 0,716 |
| 6 | 17150347 | 0,716 |
| 6 | 17150361 | 0,716 |
| 6 | 17150539 | 0,716 |
| 6 | 17150769 | 0,716 |
| 6 | 17150995 | 0,716 |
| 6 | 17151018 | 0,716 |
| 6 | 17151467 | 0,716 |
| 6 | 17151763 | 0,716 |
| 6 | 17151765 | 0,716 |
| 6 | 17163314 | 0,716 |
| 6 | 17163866 | 0,716 |
| 6 | 17164024 | 0,716 |
| 6 | 17164798 | 0,716 |
| 6 | 17164895 | 0,716 |
| 6 | 17165611 | 0,716 |
| 6 | 17166150 | 0,716 |
| 6 | 17166237 | 0,716 |
| 6 | 17166344 | 0,716 |
| 6 | 17166450 | 0,716 |
| 6 | 17166585 | 0,716 |
| 6 | 17166677 | 0,716 |
| 6 | 17167131 | 0,716 |
| 6 | 17167462 | 0,716 |
| 6 | 17167533 | 0,716 |
| 6 | 17167621 | 0,716 |
| 6 | 17168487 | 0,716 |
| 6 | 17169024 | 0,716 |

|   |          |       |
|---|----------|-------|
| 6 | 17169029 | 0,716 |
| 6 | 17169219 | 0,716 |
| 6 | 17169312 | 0,716 |
| 6 | 17169386 | 0,716 |
| 6 | 17169611 | 0,716 |
| 6 | 17169699 | 0,716 |
| 6 | 17170082 | 0,716 |
| 6 | 17170157 | 0,716 |
| 6 | 17170205 | 0,716 |
| 6 | 17170333 | 0,716 |
| 6 | 17170638 | 0,716 |
| 6 | 17246955 | 0,689 |
| 6 | 17246965 | 0,742 |
| 6 | 17249027 | 0,742 |
| 6 | 17251256 | 0,716 |
| 6 | 17253440 | 0,689 |
| 6 | 17253629 | 0,633 |
| 6 | 17254771 | 0,742 |
| 6 | 17257720 | 0,716 |
| 6 | 17257965 | 0,584 |
| 6 | 17258691 | 0,637 |
| 6 | 17259492 | 0,558 |
| 6 | 17259513 | 0,663 |
| 6 | 17264516 | 0,716 |
| 6 | 17267853 | 0,742 |
| 6 | 17268166 | 0,611 |
| 6 | 17268180 | 0,558 |
| 6 | 17268226 | 0,742 |
| 6 | 17268449 | 0,663 |
| 6 | 17269580 | 0,689 |
| 6 | 17269924 | 0,663 |
| 6 | 17270445 | 0,742 |
| 6 | 17272656 | 0,530 |
| 6 | 17272663 | 0,557 |
| 6 | 17272951 | 0,583 |
| 6 | 17273454 | 0,557 |
| 6 | 17274692 | 0,742 |
| 6 | 17475792 | 0,609 |
| 6 | 17476337 | 0,609 |
| 6 | 17476390 | 0,609 |
| 6 | 17476441 | 0,609 |
| 6 | 17477750 | 0,609 |
| 6 | 17477893 | 0,609 |
| 6 | 17477897 | 0,609 |
| 6 | 17477907 | 0,609 |
| 6 | 17477924 | 0,609 |
| 6 | 17478014 | 0,609 |
| 6 | 17478686 | 0,609 |

|   |          |       |
|---|----------|-------|
| 6 | 17478809 | 0,609 |
| 6 | 17478810 | 0,609 |
| 6 | 17478837 | 0,609 |
| 6 | 17478838 | 0,609 |
| 6 | 17481494 | 0,609 |
| 6 | 17481501 | 0,609 |
| 6 | 17481545 | 0,609 |
| 6 | 17481600 | 0,609 |
| 6 | 17483842 | 0,609 |
| 6 | 17485185 | 0,609 |
| 6 | 17485639 | 0,609 |
| 6 | 17486168 | 0,609 |
| 6 | 17486260 | 0,609 |
| 6 | 17494277 | 0,609 |
| 6 | 17501502 | 0,609 |
| 6 | 17506202 | 0,609 |
| 6 | 17511622 | 0,609 |
| 6 | 17512053 | 0,742 |
| 6 | 17512306 | 0,609 |
| 6 | 17512636 | 0,609 |
| 6 | 17512696 | 0,609 |
| 6 | 17513106 | 0,609 |
| 6 | 17513683 | 0,742 |
| 6 | 17514321 | 0,742 |
| 6 | 17514364 | 0,742 |
| 6 | 17515012 | 0,609 |
| 6 | 17515223 | 0,742 |
| 6 | 17515234 | 0,609 |
| 6 | 17515581 | 0,742 |
| 6 | 17515584 | 0,742 |
| 6 | 17516329 | 0,742 |
| 6 | 17516341 | 0,742 |
| 6 | 17516400 | 0,742 |
| 6 | 17516446 | 0,609 |
| 6 | 17516531 | 0,609 |
| 6 | 17516658 | 0,609 |
| 6 | 17516748 | 0,609 |
| 6 | 17516760 | 0,609 |
| 6 | 17517484 | 0,609 |
| 6 | 17517716 | 0,609 |
| 6 | 17517800 | 0,609 |
| 6 | 17517914 | 0,609 |
| 6 | 17518100 | 0,609 |
| 6 | 17518248 | 0,609 |
| 6 | 17518289 | 0,609 |
| 6 | 17518298 | 0,609 |
| 6 | 17518353 | 0,609 |
| 6 | 17518355 | 0,609 |

|   |          |       |
|---|----------|-------|
| 6 | 17518447 | 0,609 |
| 6 | 17518486 | 0,609 |
| 6 | 17518591 | 0,609 |
| 6 | 17518606 | 0,609 |
| 6 | 17518804 | 0,742 |
| 6 | 17519248 | 0,609 |
| 6 | 17519535 | 0,742 |
| 6 | 17519597 | 0,609 |
| 6 | 17519752 | 0,609 |
| 6 | 17519853 | 0,742 |
| 6 | 17519866 | 0,609 |
| 6 | 17520022 | 0,609 |
| 6 | 17520204 | 0,609 |
| 6 | 17520314 | 0,609 |
| 6 | 17520656 | 0,609 |
| 6 | 17521146 | 0,609 |
| 6 | 17521953 | 0,742 |
| 6 | 17522051 | 0,742 |
| 6 | 17522434 | 0,742 |
| 6 | 17522549 | 0,742 |
| 6 | 17523751 | 0,742 |
| 6 | 17523870 | 0,742 |
| 6 | 17523893 | 0,742 |
| 6 | 17524019 | 0,742 |
| 6 | 17524049 | 0,742 |
| 6 | 17524070 | 0,742 |
| 6 | 17524093 | 0,742 |
| 6 | 17524124 | 0,742 |
| 6 | 17524273 | 0,742 |
| 6 | 17525270 | 0,742 |
| 6 | 17527365 | 0,742 |
| 6 | 17528259 | 0,742 |
| 6 | 17528430 | 0,742 |
| 6 | 17528448 | 0,742 |
| 6 | 17528457 | 0,742 |
| 6 | 17528475 | 0,742 |
| 6 | 17528888 | 0,742 |
| 6 | 17528913 | 0,742 |
| 6 | 17528940 | 0,742 |
| 6 | 17529882 | 0,742 |
| 6 | 17532645 | 0,742 |
| 6 | 17533058 | 0,742 |
| 6 | 17533090 | 0,742 |
| 6 | 17533766 | 0,742 |
| 6 | 17534043 | 0,742 |
| 6 | 17534983 | 0,742 |
| 6 | 17535341 | 0,742 |
| 6 | 17537560 | 0,742 |

|   |          |       |
|---|----------|-------|
| 6 | 17537660 | 0,742 |
| 6 | 17537923 | 0,742 |
| 6 | 17538314 | 0,742 |
| 6 | 17538336 | 0,742 |
| 6 | 17538398 | 0,742 |
| 6 | 17538474 | 0,742 |
| 6 | 17538654 | 0,742 |
| 6 | 17538667 | 0,742 |
| 6 | 17538707 | 0,742 |
| 6 | 17538716 | 0,742 |
| 6 | 17538728 | 0,742 |
| 6 | 17538817 | 0,742 |
| 6 | 17538828 | 0,742 |
| 6 | 17538829 | 0,742 |
| 6 | 17538847 | 0,742 |
| 6 | 17538875 | 0,742 |
| 6 | 17538876 | 0,742 |
| 6 | 17539170 | 0,742 |
| 6 | 17539347 | 0,742 |
| 6 | 17539766 | 0,742 |
| 6 | 17539813 | 0,742 |
| 6 | 17540118 | 0,742 |
| 6 | 17540297 | 0,742 |
| 6 | 17545048 | 0,742 |
| 6 | 17545104 | 0,742 |
| 6 | 17546212 | 0,742 |
| 6 | 17546332 | 0,742 |
| 6 | 17546389 | 0,742 |
| 6 | 17547697 | 0,742 |
| 6 | 17548092 | 0,742 |
| 6 | 17550567 | 0,742 |
| 6 | 17551509 | 0,742 |
| 6 | 17551675 | 0,742 |
| 6 | 17551892 | 0,742 |
| 6 | 17551933 | 0,742 |
| 6 | 17552220 | 0,742 |
| 6 | 17552221 | 0,742 |
| 6 | 17552259 | 0,742 |
| 6 | 17552260 | 0,742 |
| 6 | 17552585 | 0,742 |
| 6 | 17552662 | 0,742 |
| 6 | 17552680 | 0,742 |
| 6 | 17552722 | 0,742 |
| 6 | 17553936 | 0,742 |
| 6 | 17554213 | 0,742 |
| 6 | 17554819 | 0,742 |
| 6 | 17555095 | 0,742 |
| 6 | 17555145 | 0,742 |



|   |          |       |
|---|----------|-------|
| 6 | 17555226 | 0,742 |
| 6 | 17555347 | 0,742 |
| 6 | 17555601 | 0,742 |
| 6 | 17555619 | 0,742 |
| 6 | 17559121 | 0,742 |
| 6 | 17559514 | 0,742 |
| 6 | 17560173 | 0,742 |
| 6 | 17560177 | 0,742 |
| 6 | 17560423 | 0,742 |
| 6 | 17560424 | 0,742 |
| 6 | 17560470 | 0,742 |
| 6 | 17560889 | 0,742 |
| 6 | 17561072 | 0,742 |
| 6 | 17561198 | 0,742 |
| 6 | 17561475 | 0,742 |
| 6 | 17561499 | 0,742 |
| 6 | 17561545 | 0,742 |
| 6 | 17561596 | 0,742 |
| 6 | 17562346 | 0,742 |
| 6 | 17562440 | 0,742 |
| 6 | 17562459 | 0,742 |
| 6 | 17562461 | 0,742 |
| 6 | 17562588 | 0,742 |
| 6 | 17562638 | 0,742 |
| 6 | 17562814 | 0,742 |
| 6 | 17562966 | 0,742 |
| 6 | 17563184 | 0,742 |
| 6 | 17563386 | 0,742 |
| 6 | 17563523 | 0,742 |
| 6 | 17563749 | 0,742 |
| 6 | 17563862 | 0,742 |
| 6 | 17563974 | 0,742 |
| 6 | 17564655 | 0,742 |
| 6 | 17565308 | 0,742 |
| 6 | 17565890 | 0,742 |
| 6 | 17568326 | 0,742 |
| 6 | 17569200 | 0,742 |
| 6 | 17569228 | 0,742 |
| 6 | 17569249 | 0,742 |
| 6 | 17569329 | 0,742 |
| 6 | 17569376 | 0,742 |
| 6 | 17569379 | 0,742 |
| 6 | 17569383 | 0,742 |
| 6 | 17569389 | 0,742 |
| 6 | 17569450 | 0,742 |
| 6 | 17569456 | 0,742 |
| 6 | 17569463 | 0,742 |
| 6 | 17569543 | 0,742 |

|   |          |       |
|---|----------|-------|
| 6 | 17570208 | 0,742 |
| 6 | 17570866 | 0,742 |
| 6 | 17570962 | 0,742 |
| 6 | 17571410 | 0,742 |
| 6 | 17571664 | 0,742 |
| 6 | 17571694 | 0,742 |
| 6 | 17571741 | 0,742 |
| 6 | 17571921 | 0,742 |
| 6 | 17572290 | 0,742 |
| 6 | 17573412 | 0,742 |
| 6 | 17574492 | 0,742 |
| 6 | 17574593 | 0,742 |
| 6 | 17574637 | 0,742 |
| 6 | 17574882 | 0,742 |
| 6 | 17574884 | 0,742 |
| 6 | 17575013 | 0,742 |
| 6 | 17575138 | 0,742 |
| 6 | 17575156 | 0,742 |
| 6 | 17575348 | 0,742 |
| 6 | 17575353 | 0,742 |
| 6 | 17575432 | 0,742 |
| 6 | 17575438 | 0,742 |
| 6 | 17575444 | 0,742 |
| 6 | 17575481 | 0,742 |
| 6 | 17575502 | 0,742 |
| 6 | 17575603 | 0,742 |
| 6 | 17575609 | 0,742 |
| 6 | 17575736 | 0,742 |
| 6 | 17575803 | 0,742 |
| 6 | 17575829 | 0,742 |
| 6 | 17575831 | 0,742 |
| 6 | 17575835 | 0,742 |
| 6 | 17576009 | 0,742 |
| 6 | 17576062 | 0,742 |
| 6 | 17576068 | 0,742 |
| 6 | 17576082 | 0,742 |
| 6 | 17576094 | 0,742 |
| 6 | 17576098 | 0,742 |
| 6 | 17576106 | 0,742 |
| 6 | 17576107 | 0,742 |
| 6 | 17576127 | 0,742 |
| 6 | 17576138 | 0,742 |
| 6 | 17576143 | 0,742 |
| 6 | 17576144 | 0,742 |
| 6 | 17576308 | 0,742 |
| 6 | 17576314 | 0,742 |
| 6 | 17576322 | 0,742 |
| 6 | 17576403 | 0,742 |

|   |          |       |
|---|----------|-------|
| 6 | 17576410 | 0,742 |
| 6 | 17576418 | 0,742 |
| 6 | 17576428 | 0,742 |
| 6 | 17576486 | 0,742 |
| 6 | 17576505 | 0,742 |
| 6 | 17576531 | 0,742 |
| 6 | 17576656 | 0,742 |
| 6 | 17576662 | 0,742 |
| 6 | 17577586 | 0,742 |
| 6 | 17577659 | 0,742 |
| 6 | 17577673 | 0,742 |
| 6 | 17577872 | 0,742 |
| 6 | 17578098 | 0,742 |
| 6 | 17578111 | 0,742 |
| 6 | 17578115 | 0,742 |
| 6 | 17578116 | 0,742 |
| 6 | 17578359 | 0,742 |
| 6 | 17578505 | 0,742 |
| 6 | 17578846 | 0,742 |
| 6 | 17578884 | 0,742 |
| 6 | 17578932 | 0,742 |
| 6 | 17579852 | 0,742 |
| 6 | 17579937 | 0,742 |
| 6 | 17579958 | 0,742 |
| 6 | 17579995 | 0,742 |
| 6 | 17580047 | 0,742 |
| 6 | 17580051 | 0,742 |
| 6 | 17580189 | 0,742 |
| 6 | 17580248 | 0,742 |
| 6 | 17580283 | 0,742 |
| 6 | 17580292 | 0,742 |
| 6 | 17580466 | 0,742 |
| 6 | 17580521 | 0,742 |
| 6 | 17580586 | 0,742 |
| 6 | 17580592 | 0,742 |
| 6 | 17580797 | 0,742 |
| 6 | 17580915 | 0,742 |
| 6 | 17580942 | 0,742 |
| 6 | 17581225 | 0,742 |
| 6 | 17581296 | 0,742 |
| 6 | 17581299 | 0,742 |
| 6 | 17581341 | 0,742 |
| 6 | 17581357 | 0,742 |
| 6 | 17581379 | 0,742 |
| 6 | 17581427 | 0,742 |
| 6 | 17581593 | 0,742 |
| 6 | 17581632 | 0,742 |
| 6 | 17581634 | 0,742 |

|   |          |       |
|---|----------|-------|
| 6 | 17581649 | 0,742 |
| 6 | 17581673 | 0,742 |
| 6 | 17581701 | 0,742 |
| 6 | 17581741 | 0,742 |
| 6 | 17581799 | 0,742 |
| 6 | 17581809 | 0,742 |
| 6 | 17581897 | 0,742 |
| 6 | 17581912 | 0,742 |
| 6 | 17581915 | 0,742 |
| 6 | 17581935 | 0,742 |
| 6 | 17581938 | 0,742 |
| 6 | 17582006 | 0,742 |
| 6 | 17582295 | 0,742 |
| 6 | 17582313 | 0,742 |
| 6 | 17582322 | 0,742 |
| 6 | 17582365 | 0,742 |
| 6 | 17582604 | 0,742 |
| 6 | 17582674 | 0,742 |
| 6 | 17582745 | 0,742 |
| 6 | 17582761 | 0,742 |
| 6 | 17582871 | 0,742 |
| 6 | 17582943 | 0,742 |
| 6 | 17583044 | 0,742 |
| 6 | 17583122 | 0,742 |
| 6 | 17583175 | 0,742 |
| 6 | 17583287 | 0,742 |
| 6 | 17583430 | 0,742 |
| 6 | 17583488 | 0,742 |
| 6 | 17583579 | 0,742 |
| 6 | 17583589 | 0,742 |
| 6 | 17583594 | 0,742 |
| 6 | 17583674 | 0,742 |
| 6 | 17583731 | 0,742 |
| 6 | 17583776 | 0,742 |
| 6 | 17583897 | 0,742 |
| 6 | 17583925 | 0,742 |
| 6 | 17584002 | 0,742 |
| 6 | 17584143 | 0,742 |
| 6 | 17584429 | 0,742 |
| 6 | 17584609 | 0,742 |
| 6 | 17584658 | 0,742 |
| 6 | 17585171 | 0,742 |
| 6 | 17586097 | 0,742 |
| 6 | 17586207 | 0,742 |
| 6 | 17586223 | 0,742 |
| 6 | 17586451 | 0,742 |
| 6 | 17586612 | 0,742 |
| 6 | 17587699 | 0,742 |

|   |          |       |
|---|----------|-------|
| 6 | 17587840 | 0,742 |
| 6 | 17587880 | 0,742 |
| 6 | 17588101 | 0,742 |
| 6 | 17588105 | 0,742 |
| 6 | 17588106 | 0,742 |
| 6 | 17588196 | 0,742 |
| 6 | 17588246 | 0,742 |
| 6 | 17588329 | 0,742 |
| 6 | 17588429 | 0,742 |
| 6 | 17588594 | 0,742 |
| 6 | 17588725 | 0,742 |
| 6 | 17588739 | 0,742 |
| 6 | 17588887 | 0,742 |
| 6 | 17589169 | 0,742 |
| 6 | 17589250 | 0,742 |
| 6 | 17589317 | 0,742 |
| 6 | 17589389 | 0,742 |
| 6 | 17589404 | 0,742 |
| 6 | 17589490 | 0,742 |
| 6 | 17589491 | 0,742 |
| 6 | 17589899 | 0,742 |
| 6 | 17590062 | 0,742 |
| 6 | 17590183 | 0,742 |
| 6 | 17590664 | 0,742 |
| 6 | 17591741 | 0,742 |
| 6 | 17591996 | 0,742 |
| 6 | 17592054 | 0,742 |
| 6 | 17592080 | 0,742 |
| 6 | 17592285 | 0,742 |
| 6 | 17592783 | 0,742 |
| 6 | 17592817 | 0,742 |
| 6 | 17592828 | 0,742 |
| 6 | 17592909 | 0,742 |
| 6 | 17593063 | 0,742 |
| 6 | 17593121 | 0,742 |
| 6 | 17593237 | 0,742 |
| 6 | 17593245 | 0,742 |
| 6 | 17593249 | 0,742 |
| 6 | 17594322 | 0,742 |
| 6 | 17594621 | 0,742 |
| 6 | 17594804 | 0,742 |
| 6 | 17594987 | 0,742 |
| 6 | 17595333 | 0,742 |
| 6 | 17595398 | 0,742 |
| 6 | 17595840 | 0,742 |
| 6 | 17596058 | 0,742 |
| 6 | 17596060 | 0,742 |
| 6 | 17596258 | 0,742 |

|   |          |       |
|---|----------|-------|
| 6 | 17596297 | 0,742 |
| 6 | 17596342 | 0,742 |
| 6 | 17596422 | 0,742 |
| 6 | 17596575 | 0,742 |
| 6 | 17596602 | 0,742 |
| 6 | 17596608 | 0,742 |
| 6 | 17596622 | 0,742 |
| 6 | 17596632 | 0,742 |
| 6 | 17596633 | 0,742 |
| 6 | 17596678 | 0,742 |
| 6 | 17596766 | 0,742 |
| 6 | 17596825 | 0,742 |
| 6 | 17596828 | 0,742 |
| 6 | 17596840 | 0,742 |
| 6 | 17597176 | 0,742 |
| 6 | 17597191 | 0,742 |
| 6 | 17597231 | 0,742 |
| 6 | 17597245 | 0,742 |
| 6 | 17597497 | 0,742 |
| 6 | 17597711 | 0,742 |
| 6 | 17597915 | 0,742 |
| 6 | 17598090 | 0,742 |
| 6 | 17598878 | 0,742 |
| 6 | 17598897 | 0,742 |
| 6 | 17598903 | 0,742 |
| 6 | 17599916 | 0,742 |
| 6 | 17599932 | 0,742 |
| 6 | 17600045 | 0,742 |
| 6 | 17600056 | 0,742 |
| 6 | 17600109 | 0,742 |
| 6 | 17600115 | 0,742 |
| 6 | 17600385 | 0,742 |
| 6 | 17600415 | 0,742 |
| 6 | 17600444 | 0,742 |
| 6 | 17600450 | 0,742 |
| 6 | 17600502 | 0,742 |
| 6 | 17600546 | 0,742 |
| 6 | 17600560 | 0,742 |
| 6 | 17600593 | 0,742 |
| 6 | 17600705 | 0,742 |
| 6 | 17600778 | 0,742 |
| 6 | 17600905 | 0,742 |
| 6 | 17600912 | 0,742 |
| 6 | 17602220 | 0,742 |
| 6 | 17602299 | 0,742 |
| 6 | 17602329 | 0,742 |
| 6 | 17602368 | 0,742 |
| 6 | 17602477 | 0,742 |

|   |          |       |
|---|----------|-------|
| 6 | 17602485 | 0,742 |
| 6 | 17602486 | 0,742 |
| 6 | 17602495 | 0,742 |
| 6 | 17602580 | 0,742 |
| 6 | 17602622 | 0,742 |
| 6 | 17602636 | 0,742 |
| 6 | 17602747 | 0,742 |
| 6 | 17602899 | 0,742 |
| 6 | 17603157 | 0,742 |
| 6 | 17604023 | 0,742 |
| 6 | 17604283 | 0,742 |
| 6 | 17604533 | 0,742 |
| 6 | 17604658 | 0,742 |
| 6 | 17604946 | 0,742 |
| 6 | 17605149 | 0,742 |
| 6 | 17605679 | 0,742 |
| 6 | 17605779 | 0,742 |
| 6 | 17605827 | 0,742 |
| 6 | 17605859 | 0,742 |
| 6 | 17605906 | 0,742 |
| 6 | 17605907 | 0,742 |
| 6 | 17605953 | 0,742 |
| 6 | 17605956 | 0,742 |
| 6 | 17605974 | 0,742 |
| 6 | 17606039 | 0,742 |
| 6 | 17606049 | 0,742 |
| 6 | 17606061 | 0,742 |
| 6 | 17606062 | 0,742 |
| 6 | 17606479 | 0,742 |
| 6 | 17606558 | 0,742 |
| 6 | 17606769 | 0,742 |
| 6 | 17606906 | 0,742 |
| 6 | 17607259 | 0,742 |
| 6 | 17607297 | 0,742 |
| 6 | 17607687 | 0,742 |
| 6 | 17607798 | 0,742 |
| 6 | 17607838 | 0,742 |
| 6 | 17607852 | 0,742 |
| 6 | 17607942 | 0,742 |
| 6 | 17607944 | 0,742 |
| 6 | 17607946 | 0,742 |
| 6 | 17607954 | 0,742 |
| 6 | 17607959 | 0,742 |
| 6 | 17607967 | 0,742 |
| 6 | 17607983 | 0,742 |
| 6 | 17608026 | 0,742 |
| 6 | 17608054 | 0,742 |
| 6 | 17608081 | 0,742 |

|   |          |       |
|---|----------|-------|
| 6 | 17608159 | 0,742 |
| 6 | 17608168 | 0,742 |
| 6 | 17608174 | 0,742 |
| 6 | 17608189 | 0,742 |
| 6 | 17608200 | 0,742 |
| 6 | 17608306 | 0,742 |
| 6 | 17608311 | 0,742 |
| 6 | 17608315 | 0,742 |
| 6 | 17608316 | 0,742 |
| 6 | 17608330 | 0,742 |
| 6 | 17608362 | 0,742 |
| 6 | 17608363 | 0,742 |
| 6 | 17608366 | 0,742 |
| 6 | 17608375 | 0,742 |
| 6 | 17608461 | 0,742 |
| 6 | 17608889 | 0,742 |
| 6 | 17609067 | 0,742 |
| 6 | 17609084 | 0,742 |
| 6 | 17609130 | 0,742 |
| 6 | 17609149 | 0,742 |
| 6 | 17609153 | 0,742 |
| 6 | 17609255 | 0,742 |
| 6 | 17609336 | 0,742 |
| 6 | 17609369 | 0,742 |
| 6 | 17609603 | 0,742 |
| 6 | 17609617 | 0,742 |
| 6 | 17609661 | 0,742 |
| 6 | 17609664 | 0,742 |
| 6 | 17609743 | 0,742 |
| 6 | 17609755 | 0,742 |
| 6 | 17609758 | 0,742 |
| 6 | 17609770 | 0,742 |
| 6 | 17610079 | 0,742 |
| 6 | 17610307 | 0,742 |
| 6 | 17610332 | 0,742 |
| 6 | 17610341 | 0,742 |
| 6 | 17610423 | 0,742 |
| 6 | 17610448 | 0,742 |
| 6 | 17610450 | 0,742 |
| 6 | 17610500 | 0,742 |
| 6 | 17610518 | 0,742 |
| 6 | 17610663 | 0,742 |
| 6 | 17610757 | 0,742 |
| 6 | 17610906 | 0,742 |
| 6 | 17610926 | 0,742 |
| 6 | 17611077 | 0,742 |
| 6 | 17611133 | 0,742 |
| 6 | 17611155 | 0,742 |



|   |          |       |
|---|----------|-------|
| 6 | 17611189 | 0,742 |
| 6 | 17611499 | 0,742 |
| 6 | 17611524 | 0,742 |
| 6 | 17611662 | 0,742 |
| 6 | 17611735 | 0,742 |
| 6 | 17611741 | 0,742 |
| 6 | 17611794 | 0,742 |
| 6 | 17611881 | 0,742 |
| 6 | 17611957 | 0,742 |
| 6 | 17612302 | 0,742 |
| 6 | 17612326 | 0,742 |
| 6 | 17612341 | 0,742 |
| 6 | 17612348 | 0,742 |
| 6 | 17612429 | 0,742 |
| 6 | 17612432 | 0,742 |
| 6 | 17612433 | 0,742 |
| 6 | 17612444 | 0,742 |
| 6 | 17612468 | 0,742 |
| 6 | 17613594 | 0,742 |
| 6 | 17613690 | 0,742 |
| 6 | 17613939 | 0,742 |
| 6 | 17613945 | 0,742 |
| 6 | 17614137 | 0,742 |
| 6 | 17614198 | 0,742 |
| 6 | 17614229 | 0,742 |
| 6 | 17614270 | 0,742 |
| 6 | 17614585 | 0,742 |
| 6 | 17614658 | 0,742 |
| 6 | 17614752 | 0,742 |
| 6 | 17614753 | 0,742 |
| 6 | 17614786 | 0,742 |
| 6 | 17614862 | 0,742 |
| 6 | 17615189 | 0,742 |
| 6 | 17615383 | 0,742 |
| 6 | 17615409 | 0,742 |
| 6 | 17615420 | 0,742 |
| 6 | 17615482 | 0,742 |
| 6 | 17615489 | 0,742 |
| 6 | 17615576 | 0,742 |
| 6 | 17616194 | 0,742 |
| 6 | 17616227 | 0,742 |
| 6 | 17616268 | 0,742 |
| 6 | 17616321 | 0,742 |
| 6 | 17616391 | 0,742 |
| 6 | 17616434 | 0,742 |
| 6 | 17616463 | 0,742 |
| 6 | 17616468 | 0,742 |
| 6 | 17616624 | 0,742 |

|   |          |       |
|---|----------|-------|
| 6 | 17616851 | 0,742 |
| 6 | 17616910 | 0,742 |
| 6 | 17616963 | 0,742 |
| 6 | 17617366 | 0,742 |
| 6 | 17617951 | 0,742 |
| 6 | 17618039 | 0,742 |
| 6 | 17618264 | 0,742 |
| 6 | 17618713 | 0,742 |
| 6 | 17618839 | 0,742 |
| 6 | 17618850 | 0,742 |
| 6 | 17618997 | 0,742 |
| 6 | 17619156 | 0,742 |
| 6 | 17619177 | 0,742 |
| 6 | 17619585 | 0,742 |
| 6 | 17619689 | 0,742 |
| 6 | 17621302 | 0,742 |
| 6 | 25317172 | 0,649 |
| 6 | 25322358 | 0,649 |
| 6 | 25322443 | 0,622 |
| 6 | 25323028 | 0,622 |
| 6 | 25323464 | 0,622 |
| 6 | 25323540 | 0,622 |
| 6 | 25326026 | 0,649 |
| 6 | 25326461 | 0,649 |
| 6 | 25341050 | 0,570 |
| 6 | 25341664 | 0,622 |
| 6 | 25342160 | 0,622 |
| 6 | 25344472 | 0,649 |
| 6 | 25344669 | 0,622 |
| 6 | 25344784 | 0,649 |
| 6 | 25344813 | 0,596 |
| 6 | 25344850 | 0,622 |
| 6 | 25344900 | 0,622 |
| 6 | 25344962 | 0,622 |
| 6 | 25345051 | 0,649 |
| 6 | 25345053 | 0,649 |
| 6 | 25345076 | 0,622 |
| 6 | 25345137 | 0,649 |
| 6 | 25345189 | 0,649 |
| 6 | 25345205 | 0,622 |
| 6 | 25345220 | 0,622 |
| 6 | 25345248 | 0,649 |
| 6 | 25345250 | 0,622 |
| 6 | 25345356 | 0,649 |
| 6 | 25345420 | 0,649 |

---

**Table S4.** SNPs with allele-frequency difference > 0.5 in purging region in LW lineage on chromosome 7 (2.8-2.9 Mb).

| Chromosome | Position | AFD   |
|------------|----------|-------|
| 7          | 2834870  | 0,526 |
| 7          | 2835006  | 0,737 |
| 7          | 2835106  | 0,526 |
| 7          | 2835124  | 0,526 |
| 7          | 2835139  | 0,737 |
| 7          | 2835316  | 0,737 |
| 7          | 2835415  | 0,526 |
| 7          | 2835438  | 0,526 |
| 7          | 2835471  | 0,526 |
| 7          | 2835490  | 0,737 |
| 7          | 2835565  | 0,737 |
| 7          | 2835801  | 0,526 |
| 7          | 2836435  | 0,526 |
| 7          | 2855722  | 0,737 |
| 7          | 2855851  | 0,737 |
| 7          | 2856223  | 0,526 |
| 7          | 2856344  | 0,737 |
| 7          | 2856389  | 0,737 |
| 7          | 2856481  | 0,526 |
| 7          | 2856594  | 0,737 |
| 7          | 2856599  | 0,737 |
| 7          | 2856604  | 0,737 |
| 7          | 2856893  | 0,737 |
| 7          | 2856923  | 0,526 |
| 7          | 2856963  | 0,737 |
| 7          | 2856966  | 0,737 |
| 7          | 2856985  | 0,737 |
| 7          | 2856991  | 0,737 |
| 7          | 2856996  | 0,737 |
| 7          | 2857264  | 0,526 |
| 7          | 2857533  | 0,526 |
| 7          | 2857818  | 0,526 |
| 7          | 2858070  | 0,526 |
| 7          | 2858295  | 0,737 |
| 7          | 2950485  | 0,526 |
| 7          | 2950734  | 0,737 |
| 7          | 2952037  | 0,737 |
| 7          | 2954523  | 0,526 |
| 7          | 2954926  | 0,737 |
| 7          | 2954942  | 0,737 |
| 7          | 2954980  | 0,737 |
| 7          | 2954989  | 0,737 |
| 7          | 2955036  | 0,737 |
| 7          | 2955067  | 0,526 |

|   |         |       |
|---|---------|-------|
| 7 | 2955137 | 0,526 |
| 7 | 2955899 | 0,737 |
| 7 | 2956163 | 0,737 |
| 7 | 2956232 | 0,526 |
| 7 | 2956238 | 0,737 |
| 7 | 2956243 | 0,526 |
| 7 | 2956313 | 0,526 |
| 7 | 2956329 | 0,737 |
| 7 | 2958422 | 0,737 |
| 7 | 2976249 | 0,526 |
| 7 | 2976396 | 0,737 |

---

**Table S5.** SNPs with allele-frequency difference > 0.5 in purging region in LW lineage on chromosome 13 (3.2-3.5 Mb). Loci highlighted in green were tag SNPs selected by backward-elimination analysis in this region.

| Chromosome | Position | AFD   |
|------------|----------|-------|
| 13         | 3213191  | 0,632 |
| 13         | 3213197  | 0,632 |
| 13         | 3213235  | 0,632 |
| 13         | 3213239  | 0,632 |
| 13         | 3213477  | 0,632 |
| 13         | 3213671  | 0,632 |
| 13         | 3220658  | 0,632 |
| 13         | 3220811  | 0,632 |
| 13         | 3221898  | 0,632 |
| 13         | 3222399  | 0,632 |
| 13         | 3222413  | 0,632 |
| 13         | 3222508  | 0,632 |
| 13         | 3223469  | 0,632 |
| 13         | 3223501  | 0,632 |
| 13         | 3224029  | 0,632 |
| 13         | 3224142  | 0,632 |
| 13         | 3224168  | 0,632 |
| 13         | 3224194  | 0,632 |
| 13         | 3224206  | 0,632 |
| 13         | 3224207  | 0,632 |
| 13         | 3224208  | 0,632 |
| 13         | 3224210  | 0,632 |
| 13         | 3224298  | 0,632 |
| 13         | 3224651  | 0,632 |
| 13         | 3225579  | 0,632 |
| 13         | 3225695  | 0,632 |
| 13         | 3225727  | 0,632 |
| 13         | 3225767  | 0,632 |
| 13         | 3226449  | 0,632 |
| 13         | 3226472  | 0,632 |
| 13         | 3226596  | 0,632 |
| 13         | 3227204  | 0,632 |
| 13         | 3227578  | 0,632 |
| 13         | 3227692  | 0,632 |
| 13         | 3227698  | 0,632 |
| 13         | 3227703  | 0,632 |
| 13         | 3227722  | 0,632 |
| 13         | 3227731  | 0,632 |
| 13         | 3227751  | 0,632 |
| 13         | 3227883  | 0,632 |
| 13         | 3227892  | 0,632 |
| 13         | 3227948  | 0,632 |
| 13         | 3227950  | 0,632 |

|    |         |       |
|----|---------|-------|
| 13 | 3227962 | 0,632 |
| 13 | 3228170 | 0,632 |
| 13 | 3228202 | 0,632 |
| 13 | 3228542 | 0,632 |
| 13 | 3228559 | 0,632 |
| 13 | 3228592 | 0,632 |
| 13 | 3228605 | 0,632 |
| 13 | 3228626 | 0,632 |
| 13 | 3228806 | 0,632 |
| 13 | 3231098 | 0,632 |
| 13 | 3231291 | 0,632 |
| 13 | 3234458 | 0,632 |
| 13 | 3234502 | 0,632 |
| 13 | 3236100 | 0,632 |
| 13 | 3236632 | 0,632 |
| 13 | 3236988 | 0,632 |
| 13 | 3237366 | 0,632 |
| 13 | 3237855 | 0,632 |
| 13 | 3238664 | 0,632 |
| 13 | 3238673 | 0,632 |
| 13 | 3238751 | 0,632 |
| 13 | 3239106 | 0,632 |
| 13 | 3239147 | 0,632 |
| 13 | 3239172 | 0,632 |
| 13 | 3239190 | 0,632 |
| 13 | 3239215 | 0,632 |
| 13 | 3239219 | 0,632 |
| 13 | 3239286 | 0,632 |
| 13 | 3239304 | 0,632 |
| 13 | 3240054 | 0,632 |
| 13 | 3240162 | 0,632 |
| 13 | 3240279 | 0,632 |
| 13 | 3240321 | 0,632 |
| 13 | 3241013 | 0,632 |
| 13 | 3242053 | 0,632 |
| 13 | 3242321 | 0,632 |
| 13 | 3242391 | 0,632 |
| 13 | 3242433 | 0,632 |
| 13 | 3242494 | 0,632 |
| 13 | 3242653 | 0,632 |
| 13 | 3242736 | 0,632 |
| 13 | 3325423 | 0,605 |
| 13 | 3326758 | 0,605 |
| 13 | 3326767 | 0,605 |
| 13 | 3329507 | 0,684 |
| 13 | 3337244 | 0,658 |
| 13 | 3337726 | 0,579 |
| 13 | 3337734 | 0,579 |

|    |         |       |
|----|---------|-------|
| 13 | 3337753 | 0,579 |
| 13 | 3347092 | 0,579 |
| 13 | 3347439 | 0,658 |
| 13 | 3347590 | 0,658 |
| 13 | 3347614 | 0,658 |
| 13 | 3347628 | 0,658 |
| 13 | 3347688 | 0,579 |
| 13 | 3347726 | 0,658 |
| 13 | 3348091 | 0,579 |
| 13 | 3348208 | 0,658 |
| 13 | 3348506 | 0,658 |
| 13 | 3348508 | 0,658 |
| 13 | 3348581 | 0,658 |
| 13 | 3348970 | 0,579 |
| 13 | 3350060 | 0,658 |
| 13 | 3353445 | 0,579 |
| 13 | 3353466 | 0,579 |
| 13 | 3353795 | 0,579 |
| 13 | 3353798 | 0,579 |
| 13 | 3353948 | 0,579 |
| 13 | 3354238 | 0,579 |
| 13 | 3354892 | 0,658 |
| 13 | 3355489 | 0,500 |
| 13 | 3355563 | 0,579 |
| 13 | 3355765 | 0,658 |
| 13 | 3356743 | 0,658 |
| 13 | 3356995 | 0,579 |
| 13 | 3357094 | 0,579 |
| 13 | 3357220 | 0,500 |
| 13 | 3357697 | 0,500 |
| 13 | 3357753 | 0,658 |
| 13 | 3357762 | 0,658 |
| 13 | 3358256 | 0,500 |
| 13 | 3359343 | 0,658 |
| 13 | 3359345 | 0,658 |
| 13 | 3359718 | 0,500 |
| 13 | 3359821 | 0,658 |
| 13 | 3360471 | 0,658 |
| 13 | 3360524 | 0,500 |
| 13 | 3360548 | 0,500 |
| 13 | 3360951 | 0,658 |
| 13 | 3361180 | 0,658 |
| 13 | 3361181 | 0,500 |
| 13 | 3361293 | 0,658 |
| 13 | 3361361 | 0,658 |
| 13 | 3362190 | 0,658 |
| 13 | 3362225 | 0,500 |
| 13 | 3363491 | 0,658 |

|    |         |       |
|----|---------|-------|
| 13 | 3363947 | 0,658 |
| 13 | 3364678 | 0,658 |
| 13 | 3364862 | 0,658 |
| 13 | 3364988 | 0,658 |
| 13 | 3365031 | 0,658 |
| 13 | 3365107 | 0,658 |
| 13 | 3365464 | 0,658 |
| 13 | 3365698 | 0,658 |
| 13 | 3365949 | 0,579 |
| 13 | 3366828 | 0,579 |
| 13 | 3367290 | 0,579 |
| 13 | 3367627 | 0,658 |
| 13 | 3367632 | 0,658 |
| 13 | 3367701 | 0,658 |
| 13 | 3367704 | 0,579 |
| 13 | 3367741 | 0,658 |
| 13 | 3367805 | 0,579 |
| 13 | 3367982 | 0,579 |
| 13 | 3368035 | 0,658 |
| 13 | 3368070 | 0,658 |
| 13 | 3368227 | 0,658 |
| 13 | 3368479 | 0,658 |
| 13 | 3368560 | 0,658 |
| 13 | 3368734 | 0,658 |
| 13 | 3369505 | 0,579 |
| 13 | 3370418 | 0,500 |
| 13 | 3370585 | 0,658 |
| 13 | 3370662 | 0,658 |
| 13 | 3371096 | 0,500 |
| 13 | 3371521 | 0,579 |
| 13 | 3372080 | 0,658 |
| 13 | 3372224 | 0,658 |
| 13 | 3372953 | 0,658 |
| 13 | 3372976 | 0,500 |
| 13 | 3373005 | 0,500 |
| 13 | 3373013 | 0,500 |
| 13 | 3373382 | 0,579 |
| 13 | 3373537 | 0,658 |
| 13 | 3374186 | 0,658 |
| 13 | 3374387 | 0,500 |
| 13 | 3374451 | 0,658 |
| 13 | 3375075 | 0,500 |
| 13 | 3375146 | 0,579 |
| 13 | 3375212 | 0,579 |
| 13 | 3375509 | 0,658 |
| 13 | 3375525 | 0,579 |
| 13 | 3375635 | 0,579 |
| 13 | 3375638 | 0,579 |



|    |         |       |
|----|---------|-------|
| 13 | 3375704 | 0,658 |
| 13 | 3375963 | 0,579 |
| 13 | 3375967 | 0,579 |
| 13 | 3375979 | 0,658 |
| 13 | 3376813 | 0,500 |
| 13 | 3376872 | 0,658 |
| 13 | 3376932 | 0,579 |
| 13 | 3377000 | 0,658 |
| 13 | 3377379 | 0,658 |
| 13 | 3379438 | 0,579 |
| 13 | 3380432 | 0,579 |
| 13 | 3380585 | 0,500 |
| 13 | 3380842 | 0,500 |
| 13 | 3381156 | 0,658 |
| 13 | 3381282 | 0,500 |
| 13 | 3381288 | 0,500 |
| 13 | 3382033 | 0,500 |
| 13 | 3382052 | 0,658 |
| 13 | 3382105 | 0,579 |
| 13 | 3382216 | 0,500 |
| 13 | 3382239 | 0,500 |
| 13 | 3412966 | 0,658 |
| 13 | 3412984 | 0,658 |
| 13 | 3413003 | 0,658 |
| 13 | 3413007 | 0,658 |
| 13 | 3413022 | 0,658 |
| 13 | 3413025 | 0,658 |
| 13 | 3413843 | 0,500 |
| 13 | 3414160 | 0,500 |
| 13 | 3414287 | 0,500 |
| 13 | 3414384 | 0,500 |
| 13 | 3414716 | 0,500 |
| 13 | 3414726 | 0,500 |
| 13 | 3414797 | 0,658 |
| 13 | 3460317 | 0,579 |
| 13 | 3460453 | 0,579 |
| 13 | 3460715 | 0,579 |
| 13 | 3461384 | 0,579 |
| 13 | 3462159 | 0,579 |
| 13 | 3462216 | 0,579 |
| 13 | 3462221 | 0,579 |
| 13 | 3462229 | 0,579 |
| 13 | 3462455 | 0,579 |
| 13 | 3462646 | 0,579 |
| 13 | 3463308 | 0,579 |
| 13 | 3463320 | 0,579 |
| 13 | 3463352 | 0,579 |
| 13 | 3463553 | 0,579 |

|    |         |       |
|----|---------|-------|
| 13 | 3464217 | 0,579 |
| 13 | 3486910 | 0,658 |
| 13 | 3487821 | 0,579 |
| 13 | 3488285 | 0,579 |
| 13 | 3488581 | 0,658 |
| 13 | 3488652 | 0,579 |
| 13 | 3488755 | 0,579 |
| 13 | 3488873 | 0,658 |
| 13 | 3488912 | 0,579 |
| 13 | 3489237 | 0,579 |
| 13 | 3489331 | 0,579 |
| 13 | 3489628 | 0,658 |
| 13 | 3489697 | 0,579 |
| 13 | 3489718 | 0,579 |
| 13 | 3489762 | 0,579 |
| 13 | 3489841 | 0,579 |
| 13 | 3489900 | 0,579 |
| 13 | 3489901 | 0,579 |
| 13 | 3490132 | 0,658 |
| 13 | 3490135 | 0,579 |
| 13 | 3490167 | 0,579 |
| 13 | 3490317 | 0,579 |
| 13 | 3490380 | 0,658 |
| 13 | 3490406 | 0,579 |
| 13 | 3494738 | 0,579 |
| 13 | 3494817 | 0,658 |
| 13 | 3495425 | 0,658 |
| 13 | 3495522 | 0,658 |
| 13 | 3495558 | 0,579 |
| 13 | 3495641 | 0,658 |
| 13 | 3495648 | 0,632 |
| 13 | 3495663 | 0,632 |
| 13 | 3495684 | 0,632 |
| 13 | 3495685 | 0,632 |
| 13 | 3495688 | 0,632 |
| 13 | 3495757 | 0,632 |
| 13 | 3495828 | 0,553 |
| 13 | 3495901 | 0,632 |
| 13 | 3495920 | 0,632 |
| 13 | 3495933 | 0,632 |
| 13 | 3495937 | 0,632 |
| 13 | 3495954 | 0,632 |
| 13 | 3496043 | 0,553 |
| 13 | 3496467 | 0,553 |
| 13 | 3496981 | 0,632 |
| 13 | 3497011 | 0,632 |
| 13 | 3498304 | 0,632 |
| 13 | 3499683 | 0,658 |

|    |         |       |
|----|---------|-------|
| 13 | 3499834 | 0,658 |
| 13 | 3500241 | 0,553 |
| 13 | 3500839 | 0,553 |
| 13 | 3500854 | 0,553 |
| 13 | 3501401 | 0,632 |
| 13 | 3501443 | 0,632 |
| 13 | 3501809 | 0,632 |
| 13 | 3501880 | 0,632 |
| 13 | 3502009 | 0,632 |
| 13 | 3502021 | 0,632 |
| 13 | 3502450 | 0,632 |
| 13 | 3214343 | 0,697 |
| 13 | 3216765 | 0,697 |
| 13 | 3216784 | 0,697 |
| 13 | 3217631 | 0,697 |
| 13 | 3218011 | 0,697 |
| 13 | 3218461 | 0,697 |
| 13 | 3218781 | 0,697 |
| 13 | 3219016 | 0,697 |
| 13 | 3219120 | 0,697 |
| 13 | 3219165 | 0,697 |
| 13 | 3219321 | 0,697 |
| 13 | 3219327 | 0,697 |
| 13 | 3219336 | 0,697 |
| 13 | 3219609 | 0,697 |
| 13 | 3220096 | 0,697 |
| 13 | 3220230 | 0,697 |
| 13 | 3220543 | 0,697 |
| 13 | 3220605 | 0,697 |
| 13 | 3220898 | 0,697 |
| 13 | 3222356 | 0,697 |
| 13 | 3222375 | 0,697 |
| 13 | 3224114 | 0,697 |
| 13 | 3224135 | 0,697 |
| 13 | 3224185 | 0,697 |
| 13 | 3225323 | 0,697 |
| 13 | 3225373 | 0,697 |
| 13 | 3226886 | 0,697 |
| 13 | 3227756 | 0,697 |
| 13 | 3227849 | 0,697 |
| 13 | 3227866 | 0,697 |
| 13 | 3228129 | 0,697 |
| 13 | 3228299 | 0,697 |
| 13 | 3228300 | 0,697 |
| 13 | 3228838 | 0,697 |
| 13 | 3233670 | 0,697 |
| 13 | 3233780 | 0,697 |
| 13 | 3233816 | 0,697 |

|    |         |       |
|----|---------|-------|
| 13 | 3233930 | 0,697 |
| 13 | 3233950 | 0,697 |
| 13 | 3234455 | 0,697 |
| 13 | 3234524 | 0,697 |
| 13 | 3234579 | 0,697 |
| 13 | 3234586 | 0,697 |
| 13 | 3234613 | 0,697 |
| 13 | 3234745 | 0,697 |
| 13 | 3235677 | 0,697 |
| 13 | 3236231 | 0,697 |
| 13 | 3236602 | 0,697 |
| 13 | 3236898 | 0,697 |
| 13 | 3238486 | 0,697 |
| 13 | 3238608 | 0,697 |
| 13 | 3238635 | 0,697 |
| 13 | 3238640 | 0,697 |
| 13 | 3238696 | 0,697 |
| 13 | 3238749 | 0,697 |
| 13 | 3238767 | 0,697 |
| 13 | 3238786 | 0,697 |
| 13 | 3238855 | 0,697 |
| 13 | 3238886 | 0,697 |
| 13 | 3239318 | 0,697 |
| 13 | 3326432 | 0,597 |
| 13 | 3326688 | 0,597 |
| 13 | 3326707 | 0,597 |
| 13 | 3326792 | 0,597 |
| 13 | 3326835 | 0,597 |
| 13 | 3328272 | 0,597 |
| 13 | 3328377 | 0,597 |
| 13 | 3329158 | 0,597 |
| 13 | 3335016 | 0,597 |
| 13 | 3335018 | 0,597 |
| 13 | 3335153 | 0,597 |
| 13 | 3335577 | 0,597 |
| 13 | 3335818 | 0,597 |
| 13 | 3336218 | 0,597 |
| 13 | 3337199 | 0,597 |
| 13 | 3337245 | 0,597 |
| 13 | 3337476 | 0,597 |
| 13 | 3337627 | 0,597 |
| 13 | 3337705 | 0,597 |
| 13 | 3347646 | 0,597 |
| 13 | 3347770 | 0,597 |
| 13 | 3347781 | 0,597 |
| 13 | 3348291 | 0,597 |
| 13 | 3348767 | 0,597 |
| 13 | 3349106 | 0,597 |

|    |         |       |
|----|---------|-------|
| 13 | 3350055 | 0,597 |
| 13 | 3350123 | 0,597 |
| 13 | 3353510 | 0,597 |
| 13 | 3353520 | 0,597 |
| 13 | 3355697 | 0,597 |
| 13 | 3357510 | 0,597 |
| 13 | 3358025 | 0,597 |
| 13 | 3358730 | 0,597 |
| 13 | 3359136 | 0,597 |
| 13 | 3359178 | 0,597 |
| 13 | 3359181 | 0,597 |
| 13 | 3359199 | 0,597 |
| 13 | 3359312 | 0,597 |
| 13 | 3359563 | 0,597 |
| 13 | 3360174 | 0,597 |
| 13 | 3360285 | 0,597 |
| 13 | 3360388 | 0,597 |
| 13 | 3360801 | 0,597 |
| 13 | 3361013 | 0,597 |
| 13 | 3361190 | 0,597 |
| 13 | 3361263 | 0,597 |
| 13 | 3362280 | 0,597 |
| 13 | 3363494 | 0,597 |
| 13 | 3364449 | 0,597 |
| 13 | 3364531 | 0,597 |
| 13 | 3365041 | 0,597 |
| 13 | 3368410 | 0,597 |
| 13 | 3370110 | 0,597 |
| 13 | 3370115 | 0,597 |
| 13 | 3370533 | 0,597 |
| 13 | 3370609 | 0,597 |
| 13 | 3370615 | 0,597 |
| 13 | 3370806 | 0,597 |
| 13 | 3371012 | 0,597 |
| 13 | 3371676 | 0,597 |
| 13 | 3371902 | 0,597 |
| 13 | 3372287 | 0,597 |
| 13 | 3372875 | 0,597 |
| 13 | 3372894 | 0,597 |
| 13 | 3373102 | 0,597 |
| 13 | 3374039 | 0,597 |
| 13 | 3374131 | 0,597 |
| 13 | 3374365 | 0,597 |
| 13 | 3374370 | 0,597 |
| 13 | 3376080 | 0,597 |
| 13 | 3376589 | 0,597 |
| 13 | 3377004 | 0,597 |
| 13 | 3377027 | 0,597 |

|    |         |       |
|----|---------|-------|
| 13 | 3377222 | 0,597 |
| 13 | 3377885 | 0,597 |
| 13 | 3377894 | 0,597 |
| 13 | 3377911 | 0,597 |
| 13 | 3377973 | 0,597 |
| 13 | 3377986 | 0,597 |
| 13 | 3378008 | 0,597 |
| 13 | 3378013 | 0,597 |
| 13 | 3378029 | 0,597 |
| 13 | 3379152 | 0,597 |
| 13 | 3379245 | 0,597 |
| 13 | 3379273 | 0,597 |
| 13 | 3379352 | 0,597 |
| 13 | 3379381 | 0,597 |
| 13 | 3379443 | 0,597 |
| 13 | 3381718 | 0,597 |
| 13 | 3381720 | 0,597 |
| 13 | 3382265 | 0,597 |
| 13 | 3382414 | 0,597 |
| 13 | 3413030 | 0,597 |
| 13 | 3414169 | 0,597 |
| 13 | 3414194 | 0,597 |
| 13 | 3414310 | 0,597 |
| 13 | 3414517 | 0,597 |
| 13 | 3414713 | 0,597 |
| 13 | 3414875 | 0,597 |
| 13 | 3414912 | 0,597 |
| 13 | 3460399 | 0,597 |
| 13 | 3460408 | 0,597 |
| 13 | 3460535 | 0,597 |
| 13 | 3460811 | 0,597 |
| 13 | 3460876 | 0,597 |
| 13 | 3461264 | 0,797 |
| 13 | 3461778 | 0,797 |
| 13 | 3462378 | 0,797 |
| 13 | 3462573 | 0,797 |
| 13 | 3463013 | 0,797 |
| 13 | 3463876 | 0,797 |
| 13 | 3464248 | 0,797 |
| 13 | 3464425 | 0,797 |
| 13 | 3464439 | 0,797 |
| 13 | 3464453 | 0,797 |
| 13 | 3464494 | 0,797 |
| 13 | 3464603 | 0,797 |
| 13 | 3464870 | 0,797 |
| 13 | 3464895 | 0,797 |
| 13 | 3464949 | 0,797 |
| 13 | 3465014 | 0,797 |

|    |         |       |
|----|---------|-------|
| 13 | 3465251 | 0,797 |
| 13 | 3465253 | 0,797 |
| 13 | 3465315 | 0,797 |
| 13 | 3465518 | 0,797 |
| 13 | 3465836 | 0,797 |
| 13 | 3465914 | 0,797 |
| 13 | 3466003 | 0,797 |
| 13 | 3466133 | 0,797 |
| 13 | 3466272 | 0,797 |
| 13 | 3466361 | 0,797 |
| 13 | 3466412 | 0,797 |
| 13 | 3466729 | 0,797 |
| 13 | 3466730 | 0,797 |
| 13 | 3466758 | 0,797 |
| 13 | 3467068 | 0,797 |
| 13 | 3467387 | 0,797 |
| 13 | 3467474 | 0,797 |
| 13 | 3467793 | 0,797 |
| 13 | 3467805 | 0,797 |
| 13 | 3467906 | 0,797 |
| 13 | 3468125 | 0,797 |
| 13 | 3468206 | 0,797 |
| 13 | 3468258 | 0,797 |
| 13 | 3468277 | 0,797 |
| 13 | 3468396 | 0,797 |
| 13 | 3468729 | 0,797 |
| 13 | 3468858 | 0,797 |
| 13 | 3469135 | 0,797 |
| 13 | 3469238 | 0,797 |
| 13 | 3469298 | 0,797 |
| 13 | 3469348 | 0,797 |
| 13 | 3469386 | 0,797 |
| 13 | 3469399 | 0,797 |
| 13 | 3469408 | 0,797 |
| 13 | 3469411 | 0,797 |
| 13 | 3469456 | 0,797 |
| 13 | 3469528 | 0,797 |
| 13 | 3469557 | 0,797 |
| 13 | 3469623 | 0,797 |
| 13 | 3469647 | 0,797 |
| 13 | 3469693 | 0,797 |
| 13 | 3469784 | 0,797 |
| 13 | 3469800 | 0,797 |
| 13 | 3469942 | 0,797 |
| 13 | 3469982 | 0,797 |
| 13 | 3469993 | 0,797 |
| 13 | 3470162 | 0,797 |
| 13 | 3470192 | 0,797 |

|    |         |       |
|----|---------|-------|
| 13 | 3470340 | 0,797 |
| 13 | 3470354 | 0,797 |
| 13 | 3470496 | 0,797 |
| 13 | 3470719 | 0,797 |
| 13 | 3470870 | 0,797 |
| 13 | 3470879 | 0,797 |
| 13 | 3470911 | 0,797 |
| 13 | 3471110 | 0,797 |
| 13 | 3471125 | 0,797 |
| 13 | 3471126 | 0,797 |
| 13 | 3471232 | 0,797 |
| 13 | 3471587 | 0,797 |
| 13 | 3471612 | 0,797 |
| 13 | 3471627 | 0,797 |
| 13 | 3472751 | 0,797 |
| 13 | 3472999 | 0,797 |
| 13 | 3473153 | 0,797 |
| 13 | 3473154 | 0,797 |
| 13 | 3473287 | 0,797 |
| 13 | 3473523 | 0,797 |
| 13 | 3473649 | 0,797 |
| 13 | 3473679 | 0,797 |
| 13 | 3473681 | 0,797 |
| 13 | 3473764 | 0,797 |
| 13 | 3473866 | 0,797 |
| 13 | 3473962 | 0,797 |
| 13 | 3474083 | 0,797 |
| 13 | 3474157 | 0,797 |
| 13 | 3474164 | 0,797 |
| 13 | 3474197 | 0,797 |
| 13 | 3474600 | 0,797 |
| 13 | 3474606 | 0,797 |
| 13 | 3474650 | 0,797 |
| 13 | 3474723 | 0,797 |
| 13 | 3475118 | 0,797 |
| 13 | 3475123 | 0,797 |
| 13 | 3475220 | 0,797 |
| 13 | 3475237 | 0,797 |
| 13 | 3475243 | 0,797 |
| 13 | 3475258 | 0,797 |
| 13 | 3475394 | 0,797 |
| 13 | 3475613 | 0,797 |
| 13 | 3475618 | 0,797 |
| 13 | 3476052 | 0,797 |
| 13 | 3476184 | 0,797 |
| 13 | 3476195 | 0,797 |
| 13 | 3476237 | 0,797 |
| 13 | 3476276 | 0,797 |



|    |         |       |
|----|---------|-------|
| 13 | 3476277 | 0,797 |
| 13 | 3476278 | 0,797 |
| 13 | 3476299 | 0,797 |
| 13 | 3476377 | 0,797 |
| 13 | 3476576 | 0,797 |
| 13 | 3476638 | 0,797 |
| 13 | 3477121 | 0,797 |
| 13 | 3477146 | 0,797 |
| 13 | 3477222 | 0,797 |
| 13 | 3477258 | 0,797 |
| 13 | 3477261 | 0,797 |
| 13 | 3477271 | 0,797 |
| 13 | 3477278 | 0,797 |
| 13 | 3477338 | 0,797 |
| 13 | 3477394 | 0,797 |
| 13 | 3477442 | 0,797 |
| 13 | 3477474 | 0,797 |
| 13 | 3477538 | 0,797 |
| 13 | 3477539 | 0,797 |
| 13 | 3477556 | 0,797 |
| 13 | 3477563 | 0,797 |
| 13 | 3477567 | 0,797 |
| 13 | 3477574 | 0,797 |
| 13 | 3477578 | 0,797 |
| 13 | 3477778 | 0,797 |
| 13 | 3477782 | 0,797 |
| 13 | 3477806 | 0,797 |
| 13 | 3477808 | 0,797 |
| 13 | 3477819 | 0,797 |
| 13 | 3477833 | 0,797 |
| 13 | 3477845 | 0,797 |
| 13 | 3477912 | 0,797 |
| 13 | 3477951 | 0,797 |
| 13 | 3477964 | 0,797 |
| 13 | 3477966 | 0,797 |
| 13 | 3478023 | 0,797 |
| 13 | 3478056 | 0,797 |
| 13 | 3478104 | 0,797 |
| 13 | 3478226 | 0,797 |
| 13 | 3478406 | 0,797 |
| 13 | 3478517 | 0,797 |
| 13 | 3478551 | 0,797 |
| 13 | 3478674 | 0,797 |
| 13 | 3479086 | 0,797 |
| 13 | 3479145 | 0,797 |
| 13 | 3479263 | 0,797 |
| 13 | 3479277 | 0,797 |
| 13 | 3479288 | 0,797 |

|    |         |       |
|----|---------|-------|
| 13 | 3479411 | 0,797 |
| 13 | 3479437 | 0,797 |
| 13 | 3479868 | 0,797 |
| 13 | 3480022 | 0,797 |
| 13 | 3480045 | 0,797 |
| 13 | 3480171 | 0,797 |
| 13 | 3480228 | 0,797 |
| 13 | 3480245 | 0,797 |
| 13 | 3480584 | 0,797 |
| 13 | 3482134 | 0,797 |
| 13 | 3482309 | 0,797 |
| 13 | 3482420 | 0,797 |
| 13 | 3482451 | 0,797 |
| 13 | 3482554 | 0,797 |
| 13 | 3482577 | 0,797 |
| 13 | 3482591 | 0,797 |
| 13 | 3482732 | 0,797 |
| 13 | 3482734 | 0,797 |
| 13 | 3482739 | 0,797 |
| 13 | 3482791 | 0,797 |
| 13 | 3482809 | 0,797 |
| 13 | 3482820 | 0,797 |
| 13 | 3482837 | 0,797 |
| 13 | 3482867 | 0,797 |
| 13 | 3482918 | 0,797 |
| 13 | 3482920 | 0,797 |
| 13 | 3482937 | 0,797 |
| 13 | 3482952 | 0,797 |
| 13 | 3483033 | 0,797 |
| 13 | 3483090 | 0,797 |
| 13 | 3483199 | 0,797 |
| 13 | 3483349 | 0,797 |
| 13 | 3483403 | 0,797 |
| 13 | 3483490 | 0,797 |
| 13 | 3483500 | 0,797 |
| 13 | 3483514 | 0,797 |
| 13 | 3483579 | 0,797 |
| 13 | 3483642 | 0,797 |
| 13 | 3483791 | 0,797 |
| 13 | 3483912 | 0,797 |
| 13 | 3483923 | 0,797 |
| 13 | 3483950 | 0,797 |
| 13 | 3483958 | 0,797 |
| 13 | 3484275 | 0,797 |
| 13 | 3484355 | 0,797 |
| 13 | 3484363 | 0,797 |
| 13 | 3484369 | 0,797 |
| 13 | 3484424 | 0,797 |

|    |         |       |
|----|---------|-------|
| 13 | 3484616 | 0,797 |
| 13 | 3484967 | 0,797 |
| 13 | 3485026 | 0,797 |
| 13 | 3485636 | 0,797 |
| 13 | 3485895 | 0,797 |
| 13 | 3487527 | 0,797 |
| 13 | 3487615 | 0,797 |
| 13 | 3487628 | 0,797 |
| 13 | 3487865 | 0,797 |
| 13 | 3488389 | 0,797 |
| 13 | 3488397 | 0,797 |
| 13 | 3488491 | 0,797 |
| 13 | 3488499 | 0,797 |
| 13 | 3488613 | 0,797 |
| 13 | 3492844 | 0,797 |
| 13 | 3493239 | 0,797 |
| 13 | 3493247 | 0,797 |
| 13 | 3493261 | 0,797 |
| 13 | 3493465 | 0,797 |
| 13 | 3493647 | 0,797 |
| 13 | 3493779 | 0,797 |
| 13 | 3493813 | 0,797 |
| 13 | 3493907 | 0,797 |
| 13 | 3493931 | 0,797 |
| 13 | 3493989 | 0,797 |
| 13 | 3493992 | 0,797 |
| 13 | 3494017 | 0,797 |
| 13 | 3494873 | 0,797 |
| 13 | 3495619 | 0,797 |
| 13 | 3496492 | 0,797 |
| 13 | 3496537 | 0,797 |
| 13 | 3496636 | 0,797 |
| 13 | 3496641 | 0,797 |
| 13 | 3496831 | 0,797 |
| 13 | 3497080 | 0,797 |
| 13 | 3497849 | 0,797 |
| 13 | 3497865 | 0,797 |
| 13 | 3498418 | 0,797 |
| 13 | 3498597 | 0,797 |
| 13 | 3498679 | 0,797 |
| 13 | 3499266 | 0,797 |
| 13 | 3499362 | 0,797 |
| 13 | 3501429 | 0,797 |
| 13 | 3501479 | 0,797 |
| 13 | 3501498 | 0,797 |
| 13 | 3501629 | 0,797 |
| 13 | 3502332 | 0,797 |
| 13 | 3502475 | 0,797 |

---

**Table S6.** SNPs with allele-frequency difference > 0.5 in purging region in HW lineage on chromosome 2 (16.0-17.4 Mb). Loci highlighted in green were tag SNPs selected by backward-elimination analysis in this region.

| Chromosome | Position | AFD   |
|------------|----------|-------|
| 2          | 16018852 | 0,672 |
| 2          | 16019289 | 0,672 |
| 2          | 16020599 | 0,689 |
| 2          | 16020895 | 0,672 |
| 2          | 16020922 | 0,672 |
| 2          | 16021762 | 0,672 |
| 2          | 16021783 | 0,672 |
| 2          | 16021792 | 0,672 |
| 2          | 16021793 | 0,672 |
| 2          | 16021851 | 0,672 |
| 2          | 16022191 | 0,672 |
| 2          | 16022228 | 0,672 |
| 2          | 16022264 | 0,672 |
| 2          | 16022828 | 0,689 |
| 2          | 16022839 | 0,689 |
| 2          | 16024874 | 0,672 |
| 2          | 16025604 | 0,672 |
| 2          | 16025626 | 0,672 |
| 2          | 16025743 | 0,672 |
| 2          | 16025787 | 0,672 |
| 2          | 16025969 | 0,672 |
| 2          | 16027339 | 0,672 |
| 2          | 16027442 | 0,689 |
| 2          | 16027625 | 0,672 |
| 2          | 16028657 | 0,689 |
| 2          | 16029346 | 0,672 |
| 2          | 16029370 | 0,672 |
| 2          | 16030889 | 0,689 |
| 2          | 16032604 | 0,672 |
| 2          | 16032743 | 0,672 |
| 2          | 16033155 | 0,672 |
| 2          | 16033705 | 0,689 |
| 2          | 16034127 | 0,672 |
| 2          | 16034422 | 0,672 |
| 2          | 16034950 | 0,689 |
| 2          | 16035707 | 0,689 |
| 2          | 16036504 | 0,672 |
| 2          | 16038971 | 0,689 |
| 2          | 16039019 | 0,689 |
| 2          | 16039832 | 0,689 |
| 2          | 16040684 | 0,672 |
| 2          | 16040713 | 0,672 |
| 2          | 16040714 | 0,672 |
| 2          | 16042927 | 0,672 |

|   |          |       |
|---|----------|-------|
| 2 | 16042928 | 0,672 |
| 2 | 16043162 | 0,689 |
| 2 | 16043261 | 0,689 |
| 2 | 16044373 | 0,689 |
| 2 | 16044606 | 0,689 |
| 2 | 16044997 | 0,689 |
| 2 | 16045079 | 0,672 |
| 2 | 16045121 | 0,672 |
| 2 | 16045673 | 0,672 |
| 2 | 16047558 | 0,689 |
| 2 | 16047582 | 0,689 |
| 2 | 16048473 | 0,672 |
| 2 | 16048503 | 0,672 |
| 2 | 16048699 | 0,672 |
| 2 | 16048757 | 0,672 |
| 2 | 16048779 | 0,672 |
| 2 | 16048849 | 0,672 |
| 2 | 16048893 | 0,672 |
| 2 | 16048925 | 0,672 |
| 2 | 16048952 | 0,672 |
| 2 | 16048977 | 0,672 |
| 2 | 16049063 | 0,672 |
| 2 | 16049090 | 0,672 |
| 2 | 16049122 | 0,672 |
| 2 | 16049542 | 0,672 |
| 2 | 16049549 | 0,672 |
| 2 | 16049748 | 0,672 |
| 2 | 16049751 | 0,672 |
| 2 | 16049859 | 0,672 |
| 2 | 16050024 | 0,672 |
| 2 | 16050030 | 0,672 |
| 2 | 16050040 | 0,672 |
| 2 | 16050156 | 0,672 |
| 2 | 16050968 | 0,672 |
| 2 | 16050976 | 0,672 |
| 2 | 16051399 | 0,672 |
| 2 | 16051411 | 0,672 |
| 2 | 16051452 | 0,672 |
| 2 | 16051457 | 0,672 |
| 2 | 16051823 | 0,672 |
| 2 | 16052783 | 0,689 |
| 2 | 16052886 | 0,672 |
| 2 | 16052915 | 0,672 |
| 2 | 16052940 | 0,672 |
| 2 | 16052962 | 0,672 |
| 2 | 16053024 | 0,672 |
| 2 | 16053025 | 0,672 |
| 2 | 16053540 | 0,672 |

|   |          |       |
|---|----------|-------|
| 2 | 16053581 | 0,689 |
| 2 | 16053695 | 0,689 |
| 2 | 16053884 | 0,672 |
| 2 | 16053902 | 0,672 |
| 2 | 16054300 | 0,672 |
| 2 | 16054568 | 0,672 |
| 2 | 16054577 | 0,672 |
| 2 | 16054688 | 0,672 |
| 2 | 16054696 | 0,672 |
| 2 | 16055066 | 0,689 |
| 2 | 16055319 | 0,672 |
| 2 | 16055490 | 0,672 |
| 2 | 16055648 | 0,672 |
| 2 | 16055649 | 0,672 |
| 2 | 16056105 | 0,672 |
| 2 | 16056196 | 0,672 |
| 2 | 16056311 | 0,672 |
| 2 | 16056314 | 0,672 |
| 2 | 16057729 | 0,672 |
| 2 | 16057732 | 0,672 |
| 2 | 16058018 | 0,672 |
| 2 | 16058413 | 0,672 |
| 2 | 16058417 | 0,672 |
| 2 | 16058850 | 0,672 |
| 2 | 16058851 | 0,672 |
| 2 | 16059696 | 0,672 |
| 2 | 16059787 | 0,672 |
| 2 | 16059955 | 0,689 |
| 2 | 16060826 | 0,672 |
| 2 | 16060834 | 0,672 |
| 2 | 16060989 | 0,672 |
| 2 | 16061081 | 0,672 |
| 2 | 16061102 | 0,672 |
| 2 | 16061246 | 0,672 |
| 2 | 16061333 | 0,672 |
| 2 | 16061439 | 0,672 |
| 2 | 16061464 | 0,672 |
| 2 | 16061474 | 0,672 |
| 2 | 16061904 | 0,672 |
| 2 | 16062487 | 0,672 |
| 2 | 16062491 | 0,672 |
| 2 | 16063083 | 0,689 |
| 2 | 16063798 | 0,672 |
| 2 | 16063831 | 0,689 |
| 2 | 16063860 | 0,689 |
| 2 | 16065479 | 0,672 |
| 2 | 16065597 | 0,672 |
| 2 | 16065649 | 0,672 |

|   |          |       |
|---|----------|-------|
| 2 | 16067646 | 0,689 |
| 2 | 16068314 | 0,689 |
| 2 | 16069080 | 0,672 |
| 2 | 16069989 | 0,672 |
| 2 | 16072407 | 0,672 |
| 2 | 16074026 | 0,689 |
| 2 | 16076012 | 0,672 |
| 2 | 16076604 | 0,689 |
| 2 | 16076666 | 0,672 |
| 2 | 16076981 | 0,689 |
| 2 | 16077217 | 0,672 |
| 2 | 16077218 | 0,672 |
| 2 | 16077494 | 0,689 |
| 2 | 16078419 | 0,689 |
| 2 | 16078952 | 0,689 |
| 2 | 16079439 | 0,689 |
| 2 | 16079455 | 0,689 |
| 2 | 16079635 | 0,689 |
| 2 | 16080405 | 0,672 |
| 2 | 16080598 | 0,689 |
| 2 | 16082538 | 0,672 |
| 2 | 16082565 | 0,672 |
| 2 | 16082601 | 0,672 |
| 2 | 16082608 | 0,672 |
| 2 | 16083329 | 0,672 |
| 2 | 16083442 | 0,672 |
| 2 | 16083443 | 0,672 |
| 2 | 16084943 | 0,672 |
| 2 | 16084968 | 0,672 |
| 2 | 16085044 | 0,672 |
| 2 | 16085102 | 0,672 |
| 2 | 16085418 | 0,689 |
| 2 | 16085660 | 0,689 |
| 2 | 16085803 | 0,672 |
| 2 | 16094132 | 0,689 |
| 2 | 16094161 | 0,689 |
| 2 | 16130390 | 0,672 |
| 2 | 16130395 | 0,672 |
| 2 | 16130405 | 0,672 |
| 2 | 16130407 | 0,672 |
| 2 | 16130990 | 0,672 |
| 2 | 16131145 | 0,689 |
| 2 | 16131239 | 0,689 |
| 2 | 16131302 | 0,689 |
| 2 | 16131354 | 0,689 |
| 2 | 16131372 | 0,689 |
| 2 | 16131407 | 0,689 |
| 2 | 16131792 | 0,689 |

|   |          |       |
|---|----------|-------|
| 2 | 16131832 | 0,689 |
| 2 | 16131878 | 0,689 |
| 2 | 16131937 | 0,672 |
| 2 | 16131945 | 0,672 |
| 2 | 16132931 | 0,672 |
| 2 | 16133009 | 0,672 |
| 2 | 16133141 | 0,672 |
| 2 | 16133351 | 0,672 |
| 2 | 16133462 | 0,689 |
| 2 | 16133502 | 0,689 |
| 2 | 16133720 | 0,672 |
| 2 | 16133722 | 0,672 |
| 2 | 16133860 | 0,672 |
| 2 | 16134183 | 0,672 |
| 2 | 16134940 | 0,672 |
| 2 | 16134948 | 0,672 |
| 2 | 16135076 | 0,672 |
| 2 | 16135117 | 0,672 |
| 2 | 16135567 | 0,689 |
| 2 | 16136504 | 0,689 |
| 2 | 16163499 | 0,672 |
| 2 | 16163993 | 0,672 |
| 2 | 16164047 | 0,672 |
| 2 | 16164199 | 0,672 |
| 2 | 16164201 | 0,672 |
| 2 | 16164213 | 0,672 |
| 2 | 16164360 | 0,672 |
| 2 | 16164364 | 0,672 |
| 2 | 16164463 | 0,689 |
| 2 | 16164533 | 0,689 |
| 2 | 16164750 | 0,689 |
| 2 | 16164773 | 0,689 |
| 2 | 16164774 | 0,689 |
| 2 | 16165241 | 0,689 |
| 2 | 16165306 | 0,689 |
| 2 | 16165378 | 0,672 |
| 2 | 16167770 | 0,689 |
| 2 | 16168501 | 0,689 |
| 2 | 16168546 | 0,672 |
| 2 | 16168558 | 0,672 |
| 2 | 16169682 | 0,672 |
| 2 | 16169746 | 0,672 |
| 2 | 16170191 | 0,672 |
| 2 | 16170335 | 0,672 |
| 2 | 16170346 | 0,672 |
| 2 | 16170358 | 0,672 |
| 2 | 16170399 | 0,672 |
| 2 | 16170540 | 0,672 |



|   |          |       |
|---|----------|-------|
| 2 | 16170572 | 0,672 |
| 2 | 16170615 | 0,672 |
| 2 | 16170700 | 0,672 |
| 2 | 16170738 | 0,672 |
| 2 | 16171001 | 0,689 |
| 2 | 16171207 | 0,689 |
| 2 | 16171242 | 0,689 |
| 2 | 16194720 | 0,672 |
| 2 | 16195714 | 0,689 |
| 2 | 16196801 | 0,689 |
| 2 | 16196895 | 0,672 |
| 2 | 16196934 | 0,672 |
| 2 | 16197837 | 0,689 |
| 2 | 16197845 | 0,689 |
| 2 | 16198210 | 0,689 |
| 2 | 16198475 | 0,672 |
| 2 | 16198496 | 0,672 |
| 2 | 16198520 | 0,672 |
| 2 | 16198599 | 0,672 |
| 2 | 16198681 | 0,672 |
| 2 | 16198708 | 0,672 |
| 2 | 16198883 | 0,672 |
| 2 | 16199700 | 0,689 |
| 2 | 16199750 | 0,672 |
| 2 | 16199791 | 0,672 |
| 2 | 16200247 | 0,689 |
| 2 | 16200248 | 0,689 |
| 2 | 16201797 | 0,672 |
| 2 | 16201818 | 0,672 |
| 2 | 16201860 | 0,689 |
| 2 | 16201971 | 0,672 |
| 2 | 16203302 | 0,689 |
| 2 | 16204292 | 0,689 |
| 2 | 16204435 | 0,672 |
| 2 | 16204623 | 0,689 |
| 2 | 16204685 | 0,689 |
| 2 | 16204708 | 0,689 |
| 2 | 16204714 | 0,689 |
| 2 | 16205054 | 0,689 |
| 2 | 16205986 | 0,689 |
| 2 | 16207454 | 0,672 |
| 2 | 16209050 | 0,672 |
| 2 | 16209138 | 0,689 |
| 2 | 16209202 | 0,689 |
| 2 | 16209354 | 0,672 |
| 2 | 16209355 | 0,672 |
| 2 | 16211118 | 0,689 |
| 2 | 16215251 | 0,672 |

|   |          |       |
|---|----------|-------|
| 2 | 16215506 | 0,672 |
| 2 | 16215514 | 0,672 |
| 2 | 16215515 | 0,672 |
| 2 | 16215521 | 0,672 |
| 2 | 16215540 | 0,672 |
| 2 | 16215574 | 0,672 |
| 2 | 16215578 | 0,672 |
| 2 | 16215751 | 0,672 |
| 2 | 16215990 | 0,672 |
| 2 | 16216352 | 0,672 |
| 2 | 16216513 | 0,672 |
| 2 | 16216600 | 0,689 |
| 2 | 16217635 | 0,689 |
| 2 | 16219101 | 0,672 |
| 2 | 16219722 | 0,689 |
| 2 | 16221016 | 0,689 |
| 2 | 16222281 | 0,689 |
| 2 | 16222323 | 0,689 |
| 2 | 16222364 | 0,689 |
| 2 | 16222371 | 0,689 |
| 2 | 16222595 | 0,672 |
| 2 | 16223718 | 0,672 |
| 2 | 16224060 | 0,672 |
| 2 | 16224109 | 0,672 |
| 2 | 16224308 | 0,672 |
| 2 | 16224521 | 0,672 |
| 2 | 16224936 | 0,672 |
| 2 | 16224937 | 0,672 |
| 2 | 16225000 | 0,689 |
| 2 | 16225400 | 0,689 |
| 2 | 16225728 | 0,672 |
| 2 | 16225730 | 0,672 |
| 2 | 16225731 | 0,672 |
| 2 | 16225886 | 0,689 |
| 2 | 16225939 | 0,689 |
| 2 | 16226313 | 0,672 |
| 2 | 16226316 | 0,672 |
| 2 | 16226334 | 0,672 |
| 2 | 16226352 | 0,672 |
| 2 | 16226874 | 0,672 |
| 2 | 16226982 | 0,672 |
| 2 | 16227150 | 0,689 |
| 2 | 16228770 | 0,689 |
| 2 | 16228854 | 0,689 |
| 2 | 16229632 | 0,689 |
| 2 | 16230834 | 0,689 |
| 2 | 16230925 | 0,689 |
| 2 | 16230991 | 0,689 |

|   |          |       |
|---|----------|-------|
| 2 | 16231040 | 0,689 |
| 2 | 16231043 | 0,689 |
| 2 | 16231265 | 0,689 |
| 2 | 16232847 | 0,672 |
| 2 | 16233029 | 0,689 |
| 2 | 16233042 | 0,689 |
| 2 | 16233417 | 0,689 |
| 2 | 16233419 | 0,689 |
| 2 | 16233478 | 0,689 |
| 2 | 16233547 | 0,689 |
| 2 | 16233679 | 0,689 |
| 2 | 16234103 | 0,672 |
| 2 | 16234458 | 0,672 |
| 2 | 16234797 | 0,689 |
| 2 | 16234989 | 0,672 |
| 2 | 16234998 | 0,672 |
| 2 | 16235005 | 0,672 |
| 2 | 16235007 | 0,672 |
| 2 | 16235050 | 0,672 |
| 2 | 16235087 | 0,672 |
| 2 | 16235508 | 0,689 |
| 2 | 16235721 | 0,672 |
| 2 | 16236593 | 0,672 |
| 2 | 16237466 | 0,689 |
| 2 | 16238772 | 0,689 |
| 2 | 16238824 | 0,689 |
| 2 | 16238884 | 0,689 |
| 2 | 16239125 | 0,689 |
| 2 | 16239258 | 0,689 |
| 2 | 16239314 | 0,672 |
| 2 | 16239322 | 0,672 |
| 2 | 16239818 | 0,689 |
| 2 | 16240842 | 0,672 |
| 2 | 16240865 | 0,672 |
| 2 | 16241694 | 0,689 |
| 2 | 16241739 | 0,689 |
| 2 | 16241954 | 0,672 |
| 2 | 16242004 | 0,672 |
| 2 | 16242639 | 0,689 |
| 2 | 16242652 | 0,689 |
| 2 | 16242792 | 0,672 |
| 2 | 16242800 | 0,672 |
| 2 | 16242806 | 0,672 |
| 2 | 16242822 | 0,672 |
| 2 | 16242823 | 0,672 |
| 2 | 16243066 | 0,689 |
| 2 | 16243138 | 0,689 |
| 2 | 16243348 | 0,689 |

|   |          |       |
|---|----------|-------|
| 2 | 16243389 | 0,689 |
| 2 | 16243408 | 0,689 |
| 2 | 16244208 | 0,689 |
| 2 | 16244250 | 0,689 |
| 2 | 16244627 | 0,689 |
| 2 | 16246276 | 0,672 |
| 2 | 16246583 | 0,689 |
| 2 | 16246758 | 0,672 |
| 2 | 16246813 | 0,672 |
| 2 | 16246830 | 0,672 |
| 2 | 16246959 | 0,672 |
| 2 | 16247124 | 0,689 |
| 2 | 16247126 | 0,689 |
| 2 | 16247484 | 0,672 |
| 2 | 16247485 | 0,672 |
| 2 | 16247664 | 0,672 |
| 2 | 16247767 | 0,672 |
| 2 | 16249256 | 0,672 |
| 2 | 16249403 | 0,672 |
| 2 | 16249433 | 0,672 |
| 2 | 16249601 | 0,672 |
| 2 | 16249602 | 0,672 |
| 2 | 16249801 | 0,672 |
| 2 | 16249849 | 0,672 |
| 2 | 16249973 | 0,672 |
| 2 | 16250091 | 0,672 |
| 2 | 16251083 | 0,672 |
| 2 | 16251091 | 0,672 |
| 2 | 16251093 | 0,672 |
| 2 | 16270943 | 0,689 |
| 2 | 16272471 | 0,689 |
| 2 | 16273523 | 0,672 |
| 2 | 16275109 | 0,689 |
| 2 | 16281315 | 0,689 |
| 2 | 16281532 | 0,689 |
| 2 | 16281614 | 0,689 |
| 2 | 16285291 | 0,672 |
| 2 | 16285311 | 0,689 |
| 2 | 16291813 | 0,689 |
| 2 | 16292123 | 0,689 |
| 2 | 16292230 | 0,672 |
| 2 | 16292352 | 0,689 |
| 2 | 16297518 | 0,672 |
| 2 | 16298142 | 0,689 |
| 2 | 16299329 | 0,714 |
| 2 | 16707887 | 0,664 |
| 2 | 16709817 | 0,664 |
| 2 | 16710654 | 0,664 |

|   |          |       |
|---|----------|-------|
| 2 | 16711259 | 0,664 |
| 2 | 16711410 | 0,664 |
| 2 | 16711630 | 0,664 |
| 2 | 16712549 | 0,664 |
| 2 | 16713106 | 0,664 |
| 2 | 16713107 | 0,664 |
| 2 | 16713980 | 0,689 |
| 2 | 16713993 | 0,689 |
| 2 | 16754407 | 0,664 |
| 2 | 16754437 | 0,664 |
| 2 | 16754447 | 0,664 |
| 2 | 16754477 | 0,664 |
| 2 | 16754546 | 0,664 |
| 2 | 16754631 | 0,664 |
| 2 | 16754764 | 0,664 |
| 2 | 16755107 | 0,664 |
| 2 | 16755258 | 0,664 |
| 2 | 16756213 | 0,664 |
| 2 | 16756385 | 0,664 |
| 2 | 16756500 | 0,664 |
| 2 | 16757980 | 0,664 |
| 2 | 16758396 | 0,664 |
| 2 | 16758482 | 0,664 |
| 2 | 16758513 | 0,664 |
| 2 | 16758627 | 0,664 |
| 2 | 16758674 | 0,664 |
| 2 | 16758680 | 0,664 |
| 2 | 16758692 | 0,664 |
| 2 | 16758708 | 0,664 |
| 2 | 16758748 | 0,664 |
| 2 | 16758845 | 0,664 |
| 2 | 16758873 | 0,664 |
| 2 | 16758883 | 0,664 |
| 2 | 16759090 | 0,664 |
| 2 | 16759093 | 0,664 |
| 2 | 16759100 | 0,664 |
| 2 | 16759101 | 0,664 |
| 2 | 16759441 | 0,664 |
| 2 | 16759453 | 0,664 |
| 2 | 16759475 | 0,664 |
| 2 | 16759527 | 0,664 |
| 2 | 16759686 | 0,664 |
| 2 | 16759702 | 0,664 |
| 2 | 16759981 | 0,664 |
| 2 | 16760100 | 0,664 |
| 2 | 16760215 | 0,664 |
| 2 | 16760235 | 0,664 |
| 2 | 16760255 | 0,664 |

|   |          |       |
|---|----------|-------|
| 2 | 16760379 | 0,664 |
| 2 | 16760484 | 0,664 |
| 2 | 16760504 | 0,664 |
| 2 | 16760549 | 0,664 |
| 2 | 16760559 | 0,664 |
| 2 | 16760672 | 0,664 |
| 2 | 16760790 | 0,664 |
| 2 | 16760854 | 0,664 |
| 2 | 16760951 | 0,664 |
| 2 | 16760976 | 0,664 |
| 2 | 16761023 | 0,664 |
| 2 | 16761075 | 0,664 |
| 2 | 16761083 | 0,664 |
| 2 | 16761088 | 0,664 |
| 2 | 16761172 | 0,664 |
| 2 | 16761780 | 0,664 |
| 2 | 16761922 | 0,664 |
| 2 | 16762011 | 0,664 |
| 2 | 16762342 | 0,664 |
| 2 | 16762412 | 0,664 |
| 2 | 16762510 | 0,664 |
| 2 | 16762537 | 0,664 |
| 2 | 16762548 | 0,664 |
| 2 | 16762558 | 0,664 |
| 2 | 16762570 | 0,664 |
| 2 | 16762577 | 0,664 |
| 2 | 16762591 | 0,664 |
| 2 | 16762863 | 0,664 |
| 2 | 16763215 | 0,664 |
| 2 | 16763220 | 0,664 |
| 2 | 16763268 | 0,664 |
| 2 | 16764005 | 0,664 |
| 2 | 16764243 | 0,664 |
| 2 | 16764364 | 0,664 |
| 2 | 16764526 | 0,664 |
| 2 | 16764708 | 0,664 |
| 2 | 16764826 | 0,664 |
| 2 | 16765509 | 0,664 |
| 2 | 16765968 | 0,664 |
| 2 | 16766165 | 0,664 |
| 2 | 16766515 | 0,664 |
| 2 | 16766701 | 0,664 |
| 2 | 16766718 | 0,664 |
| 2 | 16767005 | 0,664 |
| 2 | 16767163 | 0,664 |
| 2 | 16767405 | 0,664 |
| 2 | 16767438 | 0,664 |
| 2 | 16767488 | 0,664 |

|   |          |       |
|---|----------|-------|
| 2 | 16767616 | 0,664 |
| 2 | 16768306 | 0,664 |
| 2 | 16769069 | 0,664 |
| 2 | 16769948 | 0,664 |
| 2 | 16770018 | 0,664 |
| 2 | 16770074 | 0,664 |
| 2 | 16770114 | 0,664 |
| 2 | 16770159 | 0,664 |
| 2 | 16770174 | 0,664 |
| 2 | 16770186 | 0,664 |
| 2 | 16770212 | 0,664 |
| 2 | 16770253 | 0,664 |
| 2 | 16770257 | 0,664 |
| 2 | 16770377 | 0,664 |
| 2 | 16770456 | 0,664 |
| 2 | 16770750 | 0,664 |
| 2 | 16770756 | 0,664 |
| 2 | 16770780 | 0,664 |
| 2 | 16771011 | 0,664 |
| 2 | 16771179 | 0,664 |
| 2 | 16771253 | 0,664 |
| 2 | 16771294 | 0,664 |
| 2 | 16771296 | 0,664 |
| 2 | 16771302 | 0,664 |
| 2 | 16771326 | 0,664 |
| 2 | 16771409 | 0,664 |
| 2 | 16771434 | 0,664 |
| 2 | 16771538 | 0,664 |
| 2 | 16771797 | 0,664 |
| 2 | 16772121 | 0,664 |
| 2 | 16772308 | 0,664 |
| 2 | 16772315 | 0,664 |
| 2 | 16772555 | 0,664 |
| 2 | 16772756 | 0,664 |
| 2 | 16773329 | 0,664 |
| 2 | 16773716 | 0,664 |
| 2 | 16774290 | 0,664 |
| 2 | 16774380 | 0,664 |
| 2 | 16774400 | 0,664 |
| 2 | 16774603 | 0,664 |
| 2 | 16774882 | 0,664 |
| 2 | 16775332 | 0,664 |
| 2 | 16775352 | 0,664 |
| 2 | 16775380 | 0,664 |
| 2 | 16778485 | 0,664 |
| 2 | 16778526 | 0,664 |
| 2 | 16778547 | 0,664 |
| 2 | 16778548 | 0,664 |

|   |          |       |
|---|----------|-------|
| 2 | 16778568 | 0,664 |
| 2 | 16778582 | 0,664 |
| 2 | 16778588 | 0,664 |
| 2 | 16778605 | 0,664 |
| 2 | 16778662 | 0,664 |
| 2 | 16778785 | 0,664 |
| 2 | 16778869 | 0,664 |
| 2 | 16778990 | 0,664 |
| 2 | 16779094 | 0,664 |
| 2 | 16779123 | 0,664 |
| 2 | 16779474 | 0,664 |
| 2 | 16779490 | 0,664 |
| 2 | 16779599 | 0,664 |
| 2 | 16779601 | 0,664 |
| 2 | 16779603 | 0,664 |
| 2 | 16779641 | 0,664 |
| 2 | 16779682 | 0,664 |
| 2 | 16779895 | 0,664 |
| 2 | 16780121 | 0,664 |
| 2 | 16780125 | 0,664 |
| 2 | 16780247 | 0,664 |
| 2 | 16780249 | 0,664 |
| 2 | 16780356 | 0,664 |
| 2 | 16780521 | 0,664 |
| 2 | 16780568 | 0,664 |
| 2 | 16780891 | 0,664 |
| 2 | 16781165 | 0,664 |
| 2 | 16781190 | 0,664 |
| 2 | 16781239 | 0,664 |
| 2 | 16781533 | 0,664 |
| 2 | 16781573 | 0,664 |
| 2 | 16781856 | 0,664 |
| 2 | 16781962 | 0,664 |
| 2 | 16782057 | 0,664 |
| 2 | 16782075 | 0,664 |
| 2 | 16782077 | 0,664 |
| 2 | 16782315 | 0,664 |
| 2 | 16782702 | 0,664 |
| 2 | 16782749 | 0,664 |
| 2 | 16782863 | 0,664 |
| 2 | 16782922 | 0,664 |
| 2 | 16782969 | 0,664 |
| 2 | 16783613 | 0,664 |
| 2 | 16783705 | 0,664 |
| 2 | 16783798 | 0,664 |
| 2 | 16783940 | 0,664 |
| 2 | 16783951 | 0,664 |
| 2 | 16783995 | 0,664 |



|   |          |       |
|---|----------|-------|
| 2 | 16784172 | 0,664 |
| 2 | 16784291 | 0,664 |
| 2 | 16784339 | 0,664 |
| 2 | 16784458 | 0,664 |
| 2 | 16784548 | 0,664 |
| 2 | 16784552 | 0,664 |
| 2 | 16784694 | 0,664 |
| 2 | 16784742 | 0,664 |
| 2 | 16785336 | 0,664 |
| 2 | 16785360 | 0,664 |
| 2 | 16785700 | 0,664 |
| 2 | 16785891 | 0,664 |
| 2 | 16785954 | 0,664 |
| 2 | 16786152 | 0,664 |
| 2 | 16786204 | 0,664 |
| 2 | 16786382 | 0,664 |
| 2 | 16786593 | 0,664 |
| 2 | 16786754 | 0,664 |
| 2 | 16840452 | 0,689 |
| 2 | 16840463 | 0,689 |
| 2 | 16840707 | 0,689 |
| 2 | 16841064 | 0,689 |
| 2 | 16841458 | 0,689 |
| 2 | 16841810 | 0,689 |
| 2 | 16842001 | 0,689 |
| 2 | 16842004 | 0,689 |
| 2 | 16842008 | 0,689 |
| 2 | 16842045 | 0,689 |
| 2 | 16842134 | 0,689 |
| 2 | 16843710 | 0,689 |
| 2 | 16843822 | 0,689 |
| 2 | 16844136 | 0,689 |
| 2 | 16844153 | 0,689 |
| 2 | 16844408 | 0,689 |
| 2 | 16844776 | 0,689 |
| 2 | 16863220 | 0,689 |
| 2 | 16863950 | 0,689 |
| 2 | 16864276 | 0,689 |
| 2 | 16864295 | 0,689 |
| 2 | 16864296 | 0,689 |
| 2 | 16864363 | 0,689 |
| 2 | 16864386 | 0,689 |
| 2 | 16864395 | 0,689 |
| 2 | 16864410 | 0,689 |
| 2 | 16864438 | 0,689 |
| 2 | 16864477 | 0,689 |
| 2 | 16865341 | 0,689 |
| 2 | 16865366 | 0,689 |

|   |          |       |
|---|----------|-------|
| 2 | 16865415 | 0,689 |
| 2 | 16865453 | 0,689 |
| 2 | 16865498 | 0,689 |
| 2 | 16877920 | 0,689 |
| 2 | 16878003 | 0,689 |
| 2 | 16878046 | 0,689 |
| 2 | 16878374 | 0,689 |
| 2 | 16878734 | 0,689 |
| 2 | 16881224 | 0,689 |
| 2 | 16881308 | 0,689 |
| 2 | 16882417 | 0,689 |
| 2 | 16882514 | 0,689 |
| 2 | 16883210 | 0,689 |
| 2 | 16883276 | 0,689 |
| 2 | 16883278 | 0,689 |
| 2 | 16883331 | 0,689 |
| 2 | 16883502 | 0,689 |
| 2 | 16883520 | 0,689 |
| 2 | 16883678 | 0,689 |
| 2 | 16883742 | 0,689 |
| 2 | 16883784 | 0,689 |
| 2 | 16883886 | 0,689 |
| 2 | 16883990 | 0,689 |
| 2 | 16884061 | 0,689 |
| 2 | 16884285 | 0,689 |
| 2 | 16884421 | 0,689 |
| 2 | 16884430 | 0,689 |
| 2 | 16884506 | 0,689 |
| 2 | 16884600 | 0,689 |
| 2 | 17388396 | 0,690 |
| 2 | 17389835 | 0,690 |
| 2 | 17389928 | 0,690 |
| 2 | 17390100 | 0,690 |
| 2 | 17390255 | 0,690 |
| 2 | 17390441 | 0,690 |
| 2 | 17391044 | 0,690 |
| 2 | 17391055 | 0,690 |
| 2 | 17391165 | 0,690 |
| 2 | 17391372 | 0,690 |
| 2 | 17393443 | 0,690 |
| 2 | 17394070 | 0,690 |
| 2 | 17395177 | 0,690 |
| 2 | 17395579 | 0,690 |
| 2 | 17396199 | 0,690 |
| 2 | 17397146 | 0,690 |
| 2 | 17397197 | 0,690 |
| 2 | 17397794 | 0,690 |
| 2 | 17397940 | 0,690 |

|   |          |       |
|---|----------|-------|
| 2 | 17397974 | 0,690 |
| 2 | 17397976 | 0,690 |
| 2 | 17397987 | 0,690 |
| 2 | 17398003 | 0,690 |
| 2 | 17398048 | 0,690 |
| 2 | 17398171 | 0,690 |
| 2 | 17398306 | 0,690 |
| 2 | 17398336 | 0,690 |
| 2 | 17398349 | 0,690 |
| 2 | 17398577 | 0,690 |
| 2 | 17398671 | 0,690 |
| 2 | 17398675 | 0,690 |
| 2 | 17398747 | 0,690 |
| 2 | 17398749 | 0,690 |
| 2 | 17398754 | 0,690 |
| 2 | 17399001 | 0,690 |
| 2 | 17399210 | 0,690 |
| 2 | 17399367 | 0,690 |
| 2 | 17401104 | 0,690 |
| 2 | 17401840 | 0,690 |
| 2 | 17403266 | 0,690 |
| 2 | 17403478 | 0,690 |
| 2 | 17404921 | 0,690 |
| 2 | 17405168 | 0,690 |
| 2 | 17405495 | 0,690 |
| 2 | 17406098 | 0,690 |
| 2 | 17406484 | 0,690 |
| 2 | 17406486 | 0,690 |
| 2 | 17407984 | 0,690 |
| 2 | 17408413 | 0,690 |
| 2 | 17410792 | 0,690 |
| 2 | 17411152 | 0,690 |
| 2 | 17411221 | 0,690 |
| 2 | 17411434 | 0,690 |
| 2 | 17411730 | 0,690 |
| 2 | 17414092 | 0,690 |
| 2 | 17417392 | 0,690 |
| 2 | 17417685 | 0,690 |
| 2 | 17424838 | 0,690 |
| 2 | 17425441 | 0,690 |
| 2 | 17425485 | 0,690 |
| 2 | 17425550 | 0,690 |
| 2 | 17426111 | 0,690 |
| 2 | 17426174 | 0,690 |
| 2 | 17426370 | 0,690 |
| 2 | 17426385 | 0,690 |
| 2 | 17426805 | 0,690 |
| 2 | 17427150 | 0,690 |

|   |          |       |
|---|----------|-------|
| 2 | 17427366 | 0,690 |
| 2 | 17431383 | 0,690 |
| 2 | 17431625 | 0,690 |
| 2 | 17431874 | 0,690 |

---

**Table S7.** SNPs with allele-frequency difference > 0.5 in purging region in HW lineage on chromosome 4 (35.1-35.2 Mb). The locus highlighted in green was the tag SNP selected by backward-elimination analysis in this region.

| Chromosome | Position | AFD   |
|------------|----------|-------|
| 4          | 35195793 | 0,550 |
| 4          | 35196062 | 0,550 |
| 4          | 35196063 | 0,550 |
| 4          | 35196119 | 0,550 |
| 4          | 35196213 | 0,550 |
| 4          | 35196228 | 0,550 |
| 4          | 35198689 | 0,550 |
| 4          | 35199924 | 0,550 |
| 4          | 35200416 | 0,550 |
| 4          | 35202172 | 0,550 |
| 4          | 35202175 | 0,550 |
| 4          | 35202207 | 0,550 |
| 4          | 35202215 | 0,550 |
| 4          | 35202524 | 0,550 |
| 4          | 35202691 | 0,550 |
| 4          | 35202935 | 0,550 |
| 4          | 35202989 | 0,550 |
| 4          | 35205936 | 0,550 |
| 4          | 35206475 | 0,550 |
| 4          | 35206478 | 0,550 |
| 4          | 35206497 | 0,550 |
| 4          | 35206801 | 0,550 |
| 4          | 35207051 | 0,550 |
| 4          | 35207197 | 0,550 |
| 4          | 35207461 | 0,550 |
| 4          | 35207916 | 0,550 |
| 4          | 35208148 | 0,550 |
| 4          | 35211807 | 0,550 |
| 4          | 35211968 | 0,550 |
| 4          | 35211974 | 0,550 |
| 4          | 35213778 | 0,550 |
| 4          | 35214705 | 0,550 |
| 4          | 35214721 | 0,550 |
| 4          | 35214786 | 0,550 |
| 4          | 35214994 | 0,550 |
| 4          | 35215261 | 0,550 |
| 4          | 35217632 | 0,550 |
| 4          | 35218252 | 0,550 |
| 4          | 35219182 | 0,550 |
| 4          | 35219411 | 0,550 |
| 4          | 35219636 | 0,550 |
| 4          | 35223201 | 0,550 |
| 4          | 35223690 | 0,550 |
| 4          | 35223707 | 0,550 |

|   |          |       |
|---|----------|-------|
| 4 | 35223716 | 0,550 |
| 4 | 35223717 | 0,550 |
| 4 | 35224320 | 0,550 |
| 4 | 35225429 | 0,550 |
| 4 | 35226658 | 0,550 |

---

**Table S8.** SNPs with allele-frequency difference > 0.5 in purging region in HW lineage on chromosome 8 (2.3-2.6 Mb). Loci highlighted in green were tag SNPs selected by backward-elimination analysis in this region.

| Chromosome | Position | AFD   |
|------------|----------|-------|
| 8          | 2352132  | 0,722 |
| 8          | 2352760  | 0,722 |
| 8          | 2352967  | 0,704 |
| 8          | 2354140  | 0,704 |
| 8          | 2354158  | 0,704 |
| 8          | 2354329  | 0,704 |
| 8          | 2354340  | 0,704 |
| 8          | 2354654  | 0,704 |
| 8          | 2354680  | 0,704 |
| 8          | 2354871  | 0,704 |
| 8          | 2354881  | 0,704 |
| 8          | 2355218  | 0,722 |
| 8          | 2355368  | 0,704 |
| 8          | 2355435  | 0,722 |
| 8          | 2355446  | 0,722 |
| 8          | 2355533  | 0,704 |
| 8          | 2356259  | 0,722 |
| 8          | 2357621  | 0,687 |
| 8          | 2357625  | 0,687 |
| 8          | 2358845  | 0,722 |
| 8          | 2359118  | 0,704 |
| 8          | 2359119  | 0,704 |
| 8          | 2359837  | 0,722 |
| 8          | 2359983  | 0,722 |
| 8          | 2360084  | 0,722 |
| 8          | 2360138  | 0,704 |
| 8          | 2360145  | 0,704 |
| 8          | 2360181  | 0,722 |
| 8          | 2360304  | 0,722 |
| 8          | 2360472  | 0,722 |
| 8          | 2360473  | 0,722 |
| 8          | 2360734  | 0,722 |
| 8          | 2365486  | 0,704 |
| 8          | 2365532  | 0,704 |
| 8          | 2365921  | 0,704 |
| 8          | 2368003  | 0,704 |
| 8          | 2368038  | 0,704 |
| 8          | 2375580  | 0,722 |
| 8          | 2375595  | 0,722 |
| 8          | 2376928  | 0,722 |
| 8          | 2377305  | 0,722 |
| 8          | 2377321  | 0,722 |
| 8          | 2378216  | 0,704 |
| 8          | 2378520  | 0,722 |

|   |         |       |
|---|---------|-------|
| 8 | 2378531 | 0,722 |
| 8 | 2382995 | 0,704 |
| 8 | 2383079 | 0,704 |
| 8 | 2383085 | 0,704 |
| 8 | 2383537 | 0,722 |
| 8 | 2383776 | 0,704 |
| 8 | 2383945 | 0,704 |
| 8 | 2384229 | 0,704 |
| 8 | 2385169 | 0,704 |
| 8 | 2385997 | 0,722 |
| 8 | 2386182 | 0,704 |
| 8 | 2386402 | 0,704 |
| 8 | 2389406 | 0,722 |
| 8 | 2389433 | 0,722 |
| 8 | 2389951 | 0,704 |
| 8 | 2391000 | 0,704 |
| 8 | 2391061 | 0,704 |
| 8 | 2391755 | 0,704 |
| 8 | 2391756 | 0,704 |
| 8 | 2392059 | 0,704 |
| 8 | 2392965 | 0,704 |
| 8 | 2393051 | 0,722 |
| 8 | 2393107 | 0,722 |
| 8 | 2393831 | 0,704 |
| 8 | 2393832 | 0,704 |
| 8 | 2393859 | 0,704 |
| 8 | 2394405 | 0,704 |
| 8 | 2394420 | 0,704 |
| 8 | 2394475 | 0,704 |
| 8 | 2395264 | 0,704 |
| 8 | 2395677 | 0,704 |
| 8 | 2395700 | 0,704 |
| 8 | 2395748 | 0,722 |
| 8 | 2395759 | 0,722 |
| 8 | 2395788 | 0,722 |
| 8 | 2395867 | 0,722 |
| 8 | 2395919 | 0,704 |
| 8 | 2395927 | 0,704 |
| 8 | 2396003 | 0,704 |
| 8 | 2396287 | 0,722 |
| 8 | 2396310 | 0,722 |
| 8 | 2396356 | 0,722 |
| 8 | 2396918 | 0,722 |
| 8 | 2397074 | 0,722 |
| 8 | 2397121 | 0,722 |
| 8 | 2397234 | 0,704 |
| 8 | 2397406 | 0,722 |
| 8 | 2398504 | 0,722 |



|   |         |       |
|---|---------|-------|
| 8 | 2398509 | 0,722 |
| 8 | 2399529 | 0,704 |
| 8 | 2401770 | 0,722 |
| 8 | 2401866 | 0,722 |
| 8 | 2402059 | 0,722 |
| 8 | 2402388 | 0,704 |
| 8 | 2403479 | 0,704 |
| 8 | 2403493 | 0,704 |
| 8 | 2403522 | 0,704 |
| 8 | 2403546 | 0,704 |
| 8 | 2403588 | 0,704 |
| 8 | 2403616 | 0,722 |
| 8 | 2403693 | 0,722 |
| 8 | 2404692 | 0,704 |
| 8 | 2404795 | 0,704 |
| 8 | 2405241 | 0,704 |
| 8 | 2405272 | 0,722 |
| 8 | 2405351 | 0,722 |
| 8 | 2405550 | 0,722 |
| 8 | 2405586 | 0,722 |
| 8 | 2405769 | 0,704 |
| 8 | 2405811 | 0,704 |
| 8 | 2406448 | 0,722 |
| 8 | 2407321 | 0,704 |
| 8 | 2407727 | 0,722 |
| 8 | 2407761 | 0,722 |
| 8 | 2408362 | 0,704 |
| 8 | 2409105 | 0,722 |
| 8 | 2410302 | 0,704 |
| 8 | 2410756 | 0,704 |
| 8 | 2410989 | 0,704 |
| 8 | 2411950 | 0,722 |
| 8 | 2412253 | 0,704 |
| 8 | 2412397 | 0,704 |
| 8 | 2412399 | 0,704 |
| 8 | 2412438 | 0,704 |
| 8 | 2415152 | 0,704 |
| 8 | 2415172 | 0,704 |
| 8 | 2415393 | 0,722 |
| 8 | 2416217 | 0,704 |
| 8 | 2416404 | 0,729 |
| 8 | 2416439 | 0,704 |
| 8 | 2416451 | 0,704 |
| 8 | 2416455 | 0,704 |
| 8 | 2416457 | 0,704 |
| 8 | 2417630 | 0,704 |
| 8 | 2417654 | 0,704 |
| 8 | 2417655 | 0,704 |

|   |         |       |
|---|---------|-------|
| 8 | 2418234 | 0,722 |
| 8 | 2418665 | 0,704 |
| 8 | 2419373 | 0,722 |
| 8 | 2419641 | 0,704 |
| 8 | 2419860 | 0,704 |
| 8 | 2419888 | 0,704 |
| 8 | 2423201 | 0,729 |
| 8 | 2423203 | 0,729 |
| 8 | 2423204 | 0,729 |
| 8 | 2423206 | 0,729 |
| 8 | 2423209 | 0,729 |
| 8 | 2423212 | 0,729 |
| 8 | 2423214 | 0,729 |
| 8 | 2423215 | 0,729 |
| 8 | 2423217 | 0,729 |
| 8 | 2424465 | 0,729 |
| 8 | 2424816 | 0,729 |
| 8 | 2424820 | 0,729 |
| 8 | 2424928 | 0,747 |
| 8 | 2424975 | 0,747 |
| 8 | 2425201 | 0,747 |
| 8 | 2425232 | 0,747 |
| 8 | 2425233 | 0,747 |
| 8 | 2425235 | 0,747 |
| 8 | 2425244 | 0,747 |
| 8 | 2425258 | 0,747 |
| 8 | 2425259 | 0,747 |
| 8 | 2425267 | 0,747 |
| 8 | 2425316 | 0,747 |
| 8 | 2425797 | 0,729 |
| 8 | 2426006 | 0,747 |
| 8 | 2426115 | 0,729 |
| 8 | 2426635 | 0,729 |
| 8 | 2426764 | 0,747 |
| 8 | 2428319 | 0,729 |
| 8 | 2429762 | 0,729 |
| 8 | 2432221 | 0,729 |
| 8 | 2433788 | 0,747 |
| 8 | 2434675 | 0,747 |
| 8 | 2435758 | 0,747 |
| 8 | 2435925 | 0,729 |
| 8 | 2435926 | 0,729 |
| 8 | 2435937 | 0,729 |
| 8 | 2435958 | 0,729 |
| 8 | 2436025 | 0,729 |
| 8 | 2441087 | 0,729 |
| 8 | 2441088 | 0,729 |
| 8 | 2442528 | 0,712 |

|   |         |       |
|---|---------|-------|
| 8 | 2443111 | 0,747 |
| 8 | 2443734 | 0,747 |
| 8 | 2465954 | 0,747 |
| 8 | 2468455 | 0,747 |
| 8 | 2468806 | 0,729 |
| 8 | 2469825 | 0,747 |
| 8 | 2471323 | 0,729 |
| 8 | 2472553 | 0,729 |
| 8 | 2474293 | 0,747 |
| 8 | 2474322 | 0,747 |
| 8 | 2476990 | 0,747 |
| 8 | 2477382 | 0,747 |
| 8 | 2478394 | 0,729 |
| 8 | 2478446 | 0,729 |
| 8 | 2482154 | 0,722 |
| 8 | 2482831 | 0,729 |
| 8 | 2482941 | 0,729 |
| 8 | 2483069 | 0,729 |
| 8 | 2483757 | 0,704 |
| 8 | 2484651 | 0,722 |
| 8 | 2485395 | 0,729 |
| 8 | 2485396 | 0,729 |
| 8 | 2485881 | 0,729 |
| 8 | 2486249 | 0,722 |
| 8 | 2487971 | 0,729 |
| 8 | 2487976 | 0,729 |
| 8 | 2487980 | 0,729 |
| 8 | 2487991 | 0,729 |
| 8 | 2487998 | 0,729 |
| 8 | 2619778 | 0,597 |
| 8 | 2620204 | 0,679 |
| 8 | 2620210 | 0,679 |
| 8 | 2620314 | 0,597 |
| 8 | 2620494 | 0,654 |
| 8 | 2620787 | 0,597 |
| 8 | 2623801 | 0,654 |
| 8 | 2625125 | 0,597 |
| 8 | 2628282 | 0,679 |
| 8 | 2628294 | 0,679 |
| 8 | 2628816 | 0,597 |
| 8 | 2629287 | 0,679 |
| 8 | 2630483 | 0,597 |
| 8 | 2631782 | 0,729 |
| 8 | 2631919 | 0,679 |
| 8 | 2632180 | 0,654 |
| 8 | 2633954 | 0,597 |
| 8 | 2634120 | 0,597 |
| 8 | 2635044 | 0,704 |

|   |         |       |
|---|---------|-------|
| 8 | 2636526 | 0,597 |
| 8 | 2636785 | 0,597 |
| 8 | 2637272 | 0,729 |
| 8 | 2643498 | 0,679 |
| 8 | 2643504 | 0,754 |
| 8 | 2644173 | 0,679 |
| 8 | 2644504 | 0,704 |
| 8 | 2644949 | 0,729 |
| 8 | 2644983 | 0,754 |
| 8 | 2645124 | 0,597 |
| 8 | 2647446 | 0,754 |
| 8 | 2647882 | 0,754 |
| 8 | 2649343 | 0,597 |
| 8 | 2649393 | 0,647 |
| 8 | 2650075 | 0,704 |
| 8 | 2650398 | 0,704 |
| 8 | 2650543 | 0,622 |
| 8 | 2650552 | 0,597 |
| 8 | 2650903 | 0,729 |
| 8 | 2652329 | 0,679 |
| 8 | 2654071 | 0,622 |
| 8 | 2654993 | 0,622 |
| 8 | 2655085 | 0,597 |
| 8 | 2655594 | 0,597 |
| 8 | 2657644 | 0,597 |
| 8 | 2659396 | 0,597 |
| 8 | 2663026 | 0,679 |
| 8 | 2663732 | 0,754 |
| 8 | 2664290 | 0,679 |
| 8 | 2668676 | 0,729 |
| 8 | 2668786 | 0,597 |
| 8 | 2668916 | 0,597 |
| 8 | 2668917 | 0,597 |
| 8 | 2668953 | 0,622 |
| 8 | 2670676 | 0,629 |
| 8 | 2671025 | 0,597 |
| 8 | 2671441 | 0,754 |
| 8 | 2675858 | 0,597 |
| 8 | 2679419 | 0,604 |
| 8 | 2679420 | 0,679 |
| 8 | 2680861 | 0,597 |
| 8 | 2684657 | 0,597 |

---

**Table S9.** SNPs with allele-frequency difference > 0.5 in purging region in HW lineage on chromosome 9 (11.9-13.6 Mb). Loci highlighted in green were tag SNPs selected by backward-elimination analysis in this region.

| Chromosome | Position | AFD   |
|------------|----------|-------|
| 9          | 11962587 | 0,638 |
| 9          | 11962697 | 0,638 |
| 9          | 11962709 | 0,638 |
| 9          | 11962741 | 0,638 |
| 9          | 11962955 | 0,638 |
| 9          | 11963880 | 0,638 |
| 9          | 11966906 | 0,638 |
| 9          | 11967495 | 0,638 |
| 9          | 11967556 | 0,638 |
| 9          | 11968082 | 0,638 |
| 9          | 11968232 | 0,638 |
| 9          | 11968895 | 0,638 |
| 9          | 11968997 | 0,638 |
| 9          | 11969562 | 0,638 |
| 9          | 11969846 | 0,638 |
| 9          | 11969858 | 0,638 |
| 9          | 11969976 | 0,638 |
| 9          | 11970019 | 0,638 |
| 9          | 11970430 | 0,638 |
| 9          | 11970652 | 0,638 |
| 9          | 11970862 | 0,638 |
| 9          | 11971094 | 0,638 |
| 9          | 11971516 | 0,638 |
| 9          | 11971635 | 0,638 |
| 9          | 11973150 | 0,638 |
| 9          | 11973647 | 0,638 |
| 9          | 11974656 | 0,638 |
| 9          | 11976410 | 0,638 |
| 9          | 11976709 | 0,638 |
| 9          | 11976769 | 0,638 |
| 9          | 11977385 | 0,638 |
| 9          | 11977446 | 0,638 |
| 9          | 11978974 | 0,638 |
| 9          | 11979086 | 0,638 |
| 9          | 11979348 | 0,638 |
| 9          | 11979569 | 0,638 |
| 9          | 11979594 | 0,638 |
| 9          | 11979601 | 0,638 |
| 9          | 11979613 | 0,638 |
| 9          | 11979643 | 0,638 |
| 9          | 11979678 | 0,638 |
| 9          | 11979936 | 0,638 |
| 9          | 11980166 | 0,638 |
| 9          | 11980239 | 0,638 |

|   |          |       |
|---|----------|-------|
| 9 | 11980346 | 0,638 |
| 9 | 11981123 | 0,638 |
| 9 | 11981562 | 0,638 |
| 9 | 11981627 | 0,638 |
| 9 | 11982077 | 0,638 |
| 9 | 11982424 | 0,638 |
| 9 | 11982630 | 0,638 |
| 9 | 11982640 | 0,638 |
| 9 | 11982766 | 0,638 |
| 9 | 11982836 | 0,638 |
| 9 | 11982877 | 0,638 |
| 9 | 11982888 | 0,638 |
| 9 | 11982985 | 0,638 |
| 9 | 11982987 | 0,638 |
| 9 | 11983025 | 0,638 |
| 9 | 11983179 | 0,638 |
| 9 | 11983198 | 0,638 |
| 9 | 11983223 | 0,638 |
| 9 | 11983229 | 0,638 |
| 9 | 11983256 | 0,638 |
| 9 | 11983289 | 0,638 |
| 9 | 11983290 | 0,638 |
| 9 | 11983338 | 0,638 |
| 9 | 11983432 | 0,638 |
| 9 | 11983497 | 0,638 |
| 9 | 11983574 | 0,638 |
| 9 | 11983749 | 0,638 |
| 9 | 11983811 | 0,638 |
| 9 | 11983824 | 0,638 |
| 9 | 11983889 | 0,638 |
| 9 | 11984081 | 0,638 |
| 9 | 11984307 | 0,638 |
| 9 | 11984480 | 0,638 |
| 9 | 11984482 | 0,638 |
| 9 | 11984579 | 0,638 |
| 9 | 11984923 | 0,638 |
| 9 | 11985072 | 0,638 |
| 9 | 11985495 | 0,638 |
| 9 | 11985526 | 0,638 |
| 9 | 11985583 | 0,638 |
| 9 | 11985658 | 0,638 |
| 9 | 11985714 | 0,638 |
| 9 | 11987252 | 0,638 |
| 9 | 11987281 | 0,638 |
| 9 | 11988367 | 0,638 |
| 9 | 11988455 | 0,638 |
| 9 | 11988619 | 0,638 |
| 9 | 11988633 | 0,638 |

|   |          |       |
|---|----------|-------|
| 9 | 11988790 | 0,638 |
| 9 | 11989297 | 0,638 |
| 9 | 11989330 | 0,638 |
| 9 | 11989709 | 0,638 |
| 9 | 11989759 | 0,638 |
| 9 | 11989798 | 0,638 |
| 9 | 11989832 | 0,638 |
| 9 | 11989884 | 0,638 |
| 9 | 11990136 | 0,638 |
| 9 | 11991299 | 0,638 |
| 9 | 11991323 | 0,638 |
| 9 | 11991331 | 0,638 |
| 9 | 11991393 | 0,638 |
| 9 | 11991409 | 0,638 |
| 9 | 11991627 | 0,638 |
| 9 | 11991861 | 0,638 |
| 9 | 11992966 | 0,638 |
| 9 | 11993542 | 0,638 |
| 9 | 11993589 | 0,638 |
| 9 | 11993855 | 0,638 |
| 9 | 11993961 | 0,638 |
| 9 | 11994001 | 0,638 |
| 9 | 11994071 | 0,638 |
| 9 | 11994105 | 0,638 |
| 9 | 11994275 | 0,638 |
| 9 | 11994336 | 0,638 |
| 9 | 11994422 | 0,638 |
| 9 | 11994430 | 0,638 |
| 9 | 11994900 | 0,638 |
| 9 | 11995437 | 0,638 |
| 9 | 11995711 | 0,638 |
| 9 | 11995931 | 0,638 |
| 9 | 11995935 | 0,638 |
| 9 | 11995952 | 0,638 |
| 9 | 11995956 | 0,638 |
| 9 | 11996042 | 0,638 |
| 9 | 11996055 | 0,638 |
| 9 | 11996439 | 0,638 |
| 9 | 11996872 | 0,638 |
| 9 | 11996884 | 0,638 |
| 9 | 11997061 | 0,638 |
| 9 | 11997159 | 0,638 |
| 9 | 11997174 | 0,638 |
| 9 | 11998738 | 0,638 |
| 9 | 11998799 | 0,638 |
| 9 | 12000109 | 0,638 |
| 9 | 12000180 | 0,638 |
| 9 | 12000201 | 0,638 |

|   |          |       |
|---|----------|-------|
| 9 | 12000390 | 0,638 |
| 9 | 12000421 | 0,638 |
| 9 | 12000429 | 0,638 |
| 9 | 12000452 | 0,638 |
| 9 | 12000453 | 0,638 |
| 9 | 12000462 | 0,638 |
| 9 | 12000471 | 0,638 |
| 9 | 12000517 | 0,638 |
| 9 | 12000534 | 0,638 |
| 9 | 12000550 | 0,638 |
| 9 | 12000774 | 0,638 |
| 9 | 12000785 | 0,638 |
| 9 | 12000823 | 0,638 |
| 9 | 12000881 | 0,638 |
| 9 | 12001048 | 0,638 |
| 9 | 12001233 | 0,638 |
| 9 | 12001364 | 0,638 |
| 9 | 12001440 | 0,638 |
| 9 | 12001724 | 0,638 |
| 9 | 12001732 | 0,638 |
| 9 | 12001821 | 0,638 |
| 9 | 12001824 | 0,638 |
| 9 | 12001915 | 0,638 |
| 9 | 12002797 | 0,638 |
| 9 | 12003205 | 0,638 |
| 9 | 12003207 | 0,638 |
| 9 | 12003271 | 0,638 |
| 9 | 12003371 | 0,638 |
| 9 | 12003444 | 0,638 |
| 9 | 12003478 | 0,638 |
| 9 | 12004074 | 0,638 |
| 9 | 12004718 | 0,638 |
| 9 | 12004720 | 0,638 |
| 9 | 12004732 | 0,638 |
| 9 | 12004819 | 0,638 |
| 9 | 12004824 | 0,638 |
| 9 | 12004883 | 0,638 |
| 9 | 12004889 | 0,638 |
| 9 | 12004909 | 0,638 |
| 9 | 12005407 | 0,638 |
| 9 | 12005408 | 0,638 |
| 9 | 12005626 | 0,638 |
| 9 | 12005629 | 0,638 |
| 9 | 12005731 | 0,638 |
| 9 | 12005751 | 0,638 |
| 9 | 12005866 | 0,638 |
| 9 | 12005872 | 0,638 |
| 9 | 12005956 | 0,638 |



|   |          |       |
|---|----------|-------|
| 9 | 12006844 | 0,638 |
| 9 | 12008822 | 0,638 |
| 9 | 12008895 | 0,638 |
| 9 | 12008957 | 0,638 |
| 9 | 12009018 | 0,638 |
| 9 | 12009173 | 0,638 |
| 9 | 12009180 | 0,638 |
| 9 | 12009244 | 0,638 |
| 9 | 12009301 | 0,638 |
| 9 | 12009398 | 0,638 |
| 9 | 12009612 | 0,638 |
| 9 | 12009666 | 0,638 |
| 9 | 12009805 | 0,638 |
| 9 | 12009820 | 0,638 |
| 9 | 12009826 | 0,638 |
| 9 | 12009827 | 0,638 |
| 9 | 12010004 | 0,638 |
| 9 | 12010609 | 0,638 |
| 9 | 12011146 | 0,638 |
| 9 | 12011211 | 0,638 |
| 9 | 12011510 | 0,638 |
| 9 | 12011573 | 0,638 |
| 9 | 12011816 | 0,638 |
| 9 | 12011950 | 0,638 |
| 9 | 12011964 | 0,638 |
| 9 | 12011965 | 0,638 |
| 9 | 12011980 | 0,638 |
| 9 | 12011991 | 0,638 |
| 9 | 12012022 | 0,638 |
| 9 | 12012900 | 0,638 |
| 9 | 12013133 | 0,638 |
| 9 | 12013286 | 0,638 |
| 9 | 12013288 | 0,638 |
| 9 | 12013290 | 0,638 |
| 9 | 12013334 | 0,638 |
| 9 | 12013407 | 0,638 |
| 9 | 12013415 | 0,638 |
| 9 | 12013416 | 0,638 |
| 9 | 12013432 | 0,638 |
| 9 | 12013487 | 0,638 |
| 9 | 12013565 | 0,638 |
| 9 | 12013711 | 0,638 |
| 9 | 12013953 | 0,638 |
| 9 | 12014394 | 0,638 |
| 9 | 12014558 | 0,638 |
| 9 | 12015016 | 0,638 |
| 9 | 12015193 | 0,638 |
| 9 | 12015224 | 0,638 |

|   |          |       |
|---|----------|-------|
| 9 | 12015259 | 0,638 |
| 9 | 12015360 | 0,638 |
| 9 | 12015529 | 0,638 |
| 9 | 12015948 | 0,638 |
| 9 | 12015997 | 0,638 |
| 9 | 12016445 | 0,638 |
| 9 | 12016597 | 0,638 |
| 9 | 12016735 | 0,638 |
| 9 | 12016778 | 0,638 |
| 9 | 12016808 | 0,638 |
| 9 | 12016872 | 0,638 |
| 9 | 12016918 | 0,638 |
| 9 | 12017502 | 0,638 |
| 9 | 12017546 | 0,638 |
| 9 | 12017638 | 0,638 |
| 9 | 12018616 | 0,638 |
| 9 | 12019653 | 0,638 |
| 9 | 12021445 | 0,638 |
| 9 | 12021450 | 0,638 |
| 9 | 12030014 | 0,638 |
| 9 | 12030048 | 0,638 |
| 9 | 12030093 | 0,638 |
| 9 | 12030327 | 0,638 |
| 9 | 12030609 | 0,638 |
| 9 | 12031886 | 0,638 |
| 9 | 12031921 | 0,638 |
| 9 | 12032019 | 0,638 |
| 9 | 12032618 | 0,638 |
| 9 | 12032982 | 0,638 |
| 9 | 12033370 | 0,638 |
| 9 | 12035705 | 0,638 |
| 9 | 12035820 | 0,638 |
| 9 | 12036056 | 0,638 |
| 9 | 12036252 | 0,638 |
| 9 | 12036257 | 0,638 |
| 9 | 12036620 | 0,638 |
| 9 | 12037016 | 0,638 |
| 9 | 12037191 | 0,638 |
| 9 | 12037237 | 0,638 |
| 9 | 12037817 | 0,638 |
| 9 | 12038127 | 0,638 |
| 9 | 12039688 | 0,638 |
| 9 | 12039702 | 0,638 |
| 9 | 12039739 | 0,638 |
| 9 | 12039815 | 0,638 |
| 9 | 12039991 | 0,638 |
| 9 | 12040206 | 0,638 |
| 9 | 12040243 | 0,638 |

|   |          |       |
|---|----------|-------|
| 9 | 12040364 | 0,638 |
| 9 | 12040517 | 0,638 |
| 9 | 12042182 | 0,638 |
| 9 | 12043019 | 0,638 |
| 9 | 12043059 | 0,638 |
| 9 | 12043391 | 0,638 |
| 9 | 12044233 | 0,638 |
| 9 | 12044603 | 0,638 |
| 9 | 12046555 | 0,638 |
| 9 | 12046651 | 0,638 |
| 9 | 12046788 | 0,638 |
| 9 | 12046830 | 0,638 |
| 9 | 12046910 | 0,638 |
| 9 | 12047278 | 0,638 |
| 9 | 12047528 | 0,638 |
| 9 | 12048076 | 0,638 |
| 9 | 12048577 | 0,638 |
| 9 | 12048581 | 0,638 |
| 9 | 12049238 | 0,638 |
| 9 | 12049407 | 0,638 |
| 9 | 12049485 | 0,638 |
| 9 | 12049571 | 0,638 |
| 9 | 12049582 | 0,638 |
| 9 | 12049688 | 0,638 |
| 9 | 12049689 | 0,638 |
| 9 | 12049896 | 0,638 |
| 9 | 12049996 | 0,638 |
| 9 | 12049997 | 0,638 |
| 9 | 12050057 | 0,638 |
| 9 | 12050103 | 0,638 |
| 9 | 12050128 | 0,638 |
| 9 | 12050141 | 0,638 |
| 9 | 12050144 | 0,638 |
| 9 | 12050189 | 0,638 |
| 9 | 12050216 | 0,638 |
| 9 | 12050446 | 0,638 |
| 9 | 12050556 | 0,638 |
| 9 | 12050580 | 0,638 |
| 9 | 12050618 | 0,638 |
| 9 | 12050650 | 0,638 |
| 9 | 12050690 | 0,638 |
| 9 | 12050701 | 0,638 |
| 9 | 12050714 | 0,638 |
| 9 | 12050776 | 0,638 |
| 9 | 12051200 | 0,638 |
| 9 | 12051801 | 0,638 |
| 9 | 12051870 | 0,638 |
| 9 | 12052018 | 0,638 |

|   |          |       |
|---|----------|-------|
| 9 | 12052150 | 0,638 |
| 9 | 12052271 | 0,638 |
| 9 | 12053194 | 0,638 |
| 9 | 12053282 | 0,638 |
| 9 | 12053486 | 0,638 |
| 9 | 12053511 | 0,638 |
| 9 | 12053514 | 0,638 |
| 9 | 12053515 | 0,638 |
| 9 | 12053522 | 0,638 |
| 9 | 12053713 | 0,638 |
| 9 | 12053721 | 0,638 |
| 9 | 12053733 | 0,638 |
| 9 | 12053886 | 0,638 |
| 9 | 12054255 | 0,638 |
| 9 | 12054404 | 0,638 |
| 9 | 12054724 | 0,638 |
| 9 | 12054786 | 0,638 |
| 9 | 12054922 | 0,638 |
| 9 | 12057052 | 0,638 |
| 9 | 12057327 | 0,638 |
| 9 | 12057377 | 0,638 |
| 9 | 12057411 | 0,638 |
| 9 | 12057466 | 0,638 |
| 9 | 12057595 | 0,638 |
| 9 | 12057990 | 0,638 |
| 9 | 12058145 | 0,638 |
| 9 | 12058289 | 0,638 |
| 9 | 12060542 | 0,638 |
| 9 | 12060708 | 0,638 |
| 9 | 12061212 | 0,638 |
| 9 | 12061777 | 0,638 |
| 9 | 12061827 | 0,638 |
| 9 | 12061956 | 0,638 |
| 9 | 12061972 | 0,638 |
| 9 | 12062064 | 0,638 |
| 9 | 12062094 | 0,638 |
| 9 | 12062185 | 0,638 |
| 9 | 12062199 | 0,638 |
| 9 | 12062286 | 0,638 |
| 9 | 12062468 | 0,638 |
| 9 | 12062873 | 0,638 |
| 9 | 12063058 | 0,638 |
| 9 | 12063331 | 0,638 |
| 9 | 12063520 | 0,638 |
| 9 | 12063847 | 0,638 |
| 9 | 12065371 | 0,638 |
| 9 | 12065962 | 0,638 |
| 9 | 12066129 | 0,638 |

|   |          |       |
|---|----------|-------|
| 9 | 12066609 | 0,638 |
| 9 | 12066695 | 0,638 |
| 9 | 12067059 | 0,638 |
| 9 | 12067168 | 0,638 |
| 9 | 12067532 | 0,638 |
| 9 | 12067553 | 0,638 |
| 9 | 12067835 | 0,638 |
| 9 | 12069509 | 0,638 |
| 9 | 12070556 | 0,638 |
| 9 | 12070677 | 0,638 |
| 9 | 12071514 | 0,638 |
| 9 | 12072538 | 0,638 |
| 9 | 12072818 | 0,638 |
| 9 | 12072840 | 0,638 |
| 9 | 12072972 | 0,638 |
| 9 | 12073500 | 0,638 |
| 9 | 12073513 | 0,638 |
| 9 | 12073530 | 0,638 |
| 9 | 12073798 | 0,638 |
| 9 | 12074167 | 0,638 |
| 9 | 12074880 | 0,638 |
| 9 | 12075379 | 0,638 |
| 9 | 12075429 | 0,638 |
| 9 | 12075540 | 0,638 |
| 9 | 12075740 | 0,638 |
| 9 | 12076073 | 0,638 |
| 9 | 12076696 | 0,638 |
| 9 | 12077316 | 0,638 |
| 9 | 12077364 | 0,638 |
| 9 | 12077714 | 0,638 |
| 9 | 12079001 | 0,638 |
| 9 | 12079021 | 0,638 |
| 9 | 12079090 | 0,638 |
| 9 | 12079201 | 0,638 |
| 9 | 12085583 | 0,638 |
| 9 | 12085674 | 0,759 |
| 9 | 12085728 | 0,759 |
| 9 | 12086314 | 0,638 |
| 9 | 12086672 | 0,759 |
| 9 | 12086919 | 0,759 |
| 9 | 12086965 | 0,759 |
| 9 | 12087045 | 0,759 |
| 9 | 12087231 | 0,638 |
| 9 | 12087273 | 0,759 |
| 9 | 12087690 | 0,638 |
| 9 | 12088911 | 0,759 |
| 9 | 12089117 | 0,638 |
| 9 | 12089121 | 0,759 |

|   |          |       |
|---|----------|-------|
| 9 | 12089332 | 0,638 |
| 9 | 12089526 | 0,638 |
| 9 | 12089717 | 0,638 |
| 9 | 12089855 | 0,638 |
| 9 | 12090572 | 0,638 |
| 9 | 12090669 | 0,638 |
| 9 | 12090685 | 0,638 |
| 9 | 12091299 | 0,759 |
| 9 | 12091814 | 0,759 |
| 9 | 12092516 | 0,638 |
| 9 | 12093027 | 0,638 |
| 9 | 12093081 | 0,638 |
| 9 | 12093235 | 0,759 |
| 9 | 12093236 | 0,759 |
| 9 | 12094451 | 0,638 |
| 9 | 12094678 | 0,759 |
| 9 | 12094885 | 0,759 |
| 9 | 12095035 | 0,638 |
| 9 | 12095156 | 0,759 |
| 9 | 12095255 | 0,638 |
| 9 | 12095436 | 0,759 |
| 9 | 12095652 | 0,759 |
| 9 | 12095700 | 0,759 |
| 9 | 12095703 | 0,759 |
| 9 | 12095733 | 0,759 |
| 9 | 12096897 | 0,759 |
| 9 | 12097993 | 0,759 |
| 9 | 12098028 | 0,759 |
| 9 | 12098262 | 0,759 |
| 9 | 12098272 | 0,759 |
| 9 | 12098351 | 0,759 |
| 9 | 12098583 | 0,759 |
| 9 | 12099345 | 0,759 |
| 9 | 12099660 | 0,759 |
| 9 | 12099682 | 0,759 |
| 9 | 12099847 | 0,759 |
| 9 | 12100166 | 0,759 |
| 9 | 12100414 | 0,638 |
| 9 | 12100951 | 0,638 |
| 9 | 12101146 | 0,638 |
| 9 | 12101463 | 0,759 |
| 9 | 12101470 | 0,638 |
| 9 | 12102232 | 0,638 |
| 9 | 12104797 | 0,638 |
| 9 | 12104821 | 0,759 |
| 9 | 12104969 | 0,759 |
| 9 | 12105184 | 0,638 |
| 9 | 12105413 | 0,759 |

|   |          |       |
|---|----------|-------|
| 9 | 12105490 | 0,638 |
| 9 | 12106003 | 0,759 |
| 9 | 12106480 | 0,759 |
| 9 | 12106548 | 0,638 |
| 9 | 12106573 | 0,638 |
| 9 | 12106655 | 0,638 |
| 9 | 12106659 | 0,638 |
| 9 | 12106666 | 0,759 |
| 9 | 12106795 | 0,638 |
| 9 | 12106803 | 0,638 |
| 9 | 12106949 | 0,759 |
| 9 | 12106974 | 0,759 |
| 9 | 12107232 | 0,759 |
| 9 | 12107651 | 0,638 |
| 9 | 12107881 | 0,759 |
| 9 | 12107965 | 0,638 |
| 9 | 12107974 | 0,759 |
| 9 | 12108003 | 0,638 |
| 9 | 12108272 | 0,638 |
| 9 | 12108366 | 0,638 |
| 9 | 12108376 | 0,638 |
| 9 | 12108459 | 0,638 |
| 9 | 12108466 | 0,638 |
| 9 | 12108478 | 0,759 |
| 9 | 12108488 | 0,638 |
| 9 | 12108518 | 0,638 |
| 9 | 12108675 | 0,759 |
| 9 | 12108712 | 0,638 |
| 9 | 12108940 | 0,759 |
| 9 | 12108978 | 0,759 |
| 9 | 12108998 | 0,759 |
| 9 | 12109012 | 0,759 |
| 9 | 12109017 | 0,759 |
| 9 | 12109032 | 0,759 |
| 9 | 12109041 | 0,638 |
| 9 | 12109439 | 0,759 |
| 9 | 12109538 | 0,638 |
| 9 | 12109651 | 0,638 |
| 9 | 12109801 | 0,638 |
| 9 | 12110719 | 0,759 |
| 9 | 12111825 | 0,638 |
| 9 | 12113020 | 0,638 |
| 9 | 12113052 | 0,638 |
| 9 | 12113418 | 0,638 |
| 9 | 12113491 | 0,638 |
| 9 | 12113593 | 0,638 |
| 9 | 12113662 | 0,638 |
| 9 | 12113790 | 0,638 |

|   |          |       |
|---|----------|-------|
| 9 | 12113804 | 0,638 |
| 9 | 12113971 | 0,638 |
| 9 | 12113975 | 0,638 |
| 9 | 12114037 | 0,638 |
| 9 | 12114153 | 0,638 |
| 9 | 12114218 | 0,638 |
| 9 | 12114410 | 0,638 |
| 9 | 12114535 | 0,638 |
| 9 | 12114538 | 0,638 |
| 9 | 12114585 | 0,638 |
| 9 | 12114630 | 0,638 |
| 9 | 12114672 | 0,638 |
| 9 | 12114678 | 0,638 |
| 9 | 12114724 | 0,638 |
| 9 | 12114902 | 0,638 |
| 9 | 12115622 | 0,638 |
| 9 | 12115779 | 0,638 |
| 9 | 12115861 | 0,638 |
| 9 | 12116196 | 0,759 |
| 9 | 12117031 | 0,759 |
| 9 | 12117057 | 0,759 |
| 9 | 12117247 | 0,638 |
| 9 | 12118800 | 0,759 |
| 9 | 12118837 | 0,759 |
| 9 | 12118871 | 0,759 |
| 9 | 12118873 | 0,759 |
| 9 | 12118888 | 0,759 |
| 9 | 12119092 | 0,759 |
| 9 | 12119363 | 0,759 |
| 9 | 12119831 | 0,759 |
| 9 | 12120260 | 0,759 |
| 9 | 12120301 | 0,759 |
| 9 | 12120358 | 0,759 |
| 9 | 12120365 | 0,759 |
| 9 | 12120377 | 0,759 |
| 9 | 12120385 | 0,759 |
| 9 | 12120392 | 0,759 |
| 9 | 12120393 | 0,759 |
| 9 | 12120418 | 0,759 |
| 9 | 12120456 | 0,759 |
| 9 | 12120537 | 0,759 |
| 9 | 12120581 | 0,759 |
| 9 | 12120601 | 0,759 |
| 9 | 12120787 | 0,759 |
| 9 | 12121147 | 0,759 |
| 9 | 12121148 | 0,759 |
| 9 | 12121525 | 0,759 |
| 9 | 12121710 | 0,759 |



|   |          |       |
|---|----------|-------|
| 9 | 12121972 | 0,759 |
| 9 | 12122338 | 0,759 |
| 9 | 12122537 | 0,759 |
| 9 | 12122802 | 0,759 |
| 9 | 12122907 | 0,759 |
| 9 | 12123536 | 0,759 |
| 9 | 12123738 | 0,759 |
| 9 | 12124431 | 0,759 |
| 9 | 12124489 | 0,638 |
| 9 | 12124546 | 0,638 |
| 9 | 12124661 | 0,638 |
| 9 | 12124785 | 0,759 |
| 9 | 12124888 | 0,638 |
| 9 | 12124932 | 0,638 |
| 9 | 12125002 | 0,759 |
| 9 | 12125026 | 0,759 |
| 9 | 12125437 | 0,638 |
| 9 | 12126590 | 0,638 |
| 9 | 12126845 | 0,759 |
| 9 | 12126935 | 0,759 |
| 9 | 12127285 | 0,759 |
| 9 | 12127388 | 0,638 |
| 9 | 12127726 | 0,759 |
| 9 | 12127799 | 0,638 |
| 9 | 12128436 | 0,759 |
| 9 | 12128665 | 0,759 |
| 9 | 12128726 | 0,638 |
| 9 | 12128954 | 0,638 |
| 9 | 12129845 | 0,638 |
| 9 | 12129963 | 0,638 |
| 9 | 12130126 | 0,638 |
| 9 | 12130934 | 0,759 |
| 9 | 12131134 | 0,759 |
| 9 | 12131285 | 0,759 |
| 9 | 12131748 | 0,759 |
| 9 | 12132368 | 0,638 |
| 9 | 12132378 | 0,638 |
| 9 | 12132394 | 0,759 |
| 9 | 12133442 | 0,638 |
| 9 | 12134018 | 0,638 |
| 9 | 12134295 | 0,759 |
| 9 | 12134550 | 0,759 |
| 9 | 12134987 | 0,759 |
| 9 | 12134989 | 0,759 |
| 9 | 12135113 | 0,759 |
| 9 | 12135134 | 0,638 |
| 9 | 12135174 | 0,638 |
| 9 | 12135263 | 0,638 |

|   |          |       |
|---|----------|-------|
| 9 | 12135565 | 0,638 |
| 9 | 12135581 | 0,638 |
| 9 | 12135870 | 0,759 |
| 9 | 12135980 | 0,638 |
| 9 | 12136514 | 0,759 |
| 9 | 12136583 | 0,638 |
| 9 | 12136620 | 0,759 |
| 9 | 12136798 | 0,759 |
| 9 | 12136838 | 0,759 |
| 9 | 12136856 | 0,638 |
| 9 | 12136903 | 0,759 |
| 9 | 12136922 | 0,759 |
| 9 | 12136985 | 0,759 |
| 9 | 12136990 | 0,759 |
| 9 | 12137009 | 0,759 |
| 9 | 12137118 | 0,759 |
| 9 | 12137199 | 0,638 |
| 9 | 12137226 | 0,638 |
| 9 | 12137230 | 0,638 |
| 9 | 12137235 | 0,638 |
| 9 | 12137742 | 0,759 |
| 9 | 12137860 | 0,759 |
| 9 | 12137867 | 0,638 |
| 9 | 12138029 | 0,638 |
| 9 | 12138202 | 0,638 |
| 9 | 12138239 | 0,638 |
| 9 | 12138460 | 0,638 |
| 9 | 12138463 | 0,638 |
| 9 | 12138478 | 0,638 |
| 9 | 12138494 | 0,638 |
| 9 | 12138575 | 0,638 |
| 9 | 12138591 | 0,638 |
| 9 | 12138679 | 0,759 |
| 9 | 12138720 | 0,759 |
| 9 | 12139381 | 0,759 |
| 9 | 12139484 | 0,759 |
| 9 | 12139640 | 0,759 |
| 9 | 12139734 | 0,759 |
| 9 | 12140590 | 0,759 |
| 9 | 12140760 | 0,759 |
| 9 | 12140868 | 0,638 |
| 9 | 12141534 | 0,759 |
| 9 | 12141705 | 0,638 |
| 9 | 12141845 | 0,759 |
| 9 | 12142088 | 0,759 |
| 9 | 12142135 | 0,759 |
| 9 | 12142246 | 0,759 |
| 9 | 12142298 | 0,759 |

|   |          |       |
|---|----------|-------|
| 9 | 12142422 | 0,759 |
| 9 | 12142689 | 0,759 |
| 9 | 12142705 | 0,759 |
| 9 | 12143192 | 0,759 |
| 9 | 12143243 | 0,759 |
| 9 | 12143440 | 0,759 |
| 9 | 12143464 | 0,759 |
| 9 | 12143667 | 0,759 |
| 9 | 12143808 | 0,759 |
| 9 | 12144159 | 0,759 |
| 9 | 12144160 | 0,759 |
| 9 | 12144462 | 0,759 |
| 9 | 12145273 | 0,759 |
| 9 | 12146669 | 0,759 |
| 9 | 12147025 | 0,759 |
| 9 | 12147276 | 0,759 |
| 9 | 12147555 | 0,759 |
| 9 | 12148278 | 0,759 |
| 9 | 12148484 | 0,759 |
| 9 | 12148576 | 0,759 |
| 9 | 12148887 | 0,759 |
| 9 | 12148964 | 0,759 |
| 9 | 12149108 | 0,759 |
| 9 | 12149675 | 0,759 |
| 9 | 12150044 | 0,638 |
| 9 | 12150257 | 0,638 |
| 9 | 12150568 | 0,759 |
| 9 | 12150853 | 0,759 |
| 9 | 12151164 | 0,759 |
| 9 | 12156022 | 0,638 |
| 9 | 12156042 | 0,638 |
| 9 | 12156097 | 0,638 |
| 9 | 12156116 | 0,638 |
| 9 | 12156167 | 0,638 |
| 9 | 12156287 | 0,638 |
| 9 | 12156320 | 0,638 |
| 9 | 12156322 | 0,638 |
| 9 | 12156323 | 0,638 |
| 9 | 12156354 | 0,638 |
| 9 | 12156498 | 0,638 |
| 9 | 12156563 | 0,638 |
| 9 | 12156662 | 0,638 |
| 9 | 12156797 | 0,638 |
| 9 | 12156929 | 0,638 |
| 9 | 12156935 | 0,638 |
| 9 | 12156973 | 0,638 |
| 9 | 12156991 | 0,759 |
| 9 | 12156992 | 0,638 |

|   |          |       |
|---|----------|-------|
| 9 | 12156999 | 0,638 |
| 9 | 12157007 | 0,638 |
| 9 | 12157024 | 0,638 |
| 9 | 12157170 | 0,638 |
| 9 | 12157209 | 0,638 |
| 9 | 12157225 | 0,638 |
| 9 | 12157249 | 0,638 |
| 9 | 12157317 | 0,638 |
| 9 | 12157445 | 0,638 |
| 9 | 12157605 | 0,638 |
| 9 | 12157860 | 0,638 |
| 9 | 12157898 | 0,638 |
| 9 | 12157928 | 0,759 |
| 9 | 12157934 | 0,759 |
| 9 | 12157963 | 0,759 |
| 9 | 12158136 | 0,759 |
| 9 | 12158175 | 0,759 |
| 9 | 12158194 | 0,759 |
| 9 | 12159563 | 0,638 |
| 9 | 12159694 | 0,759 |
| 9 | 12160053 | 0,638 |
| 9 | 12160590 | 0,638 |
| 9 | 12160634 | 0,759 |
| 9 | 12161120 | 0,759 |
| 9 | 12162155 | 0,638 |
| 9 | 12162747 | 0,638 |
| 9 | 12163120 | 0,638 |
| 9 | 12163263 | 0,759 |
| 9 | 12163521 | 0,638 |
| 9 | 12163894 | 0,759 |
| 9 | 12164193 | 0,759 |
| 9 | 12164624 | 0,759 |
| 9 | 12164638 | 0,759 |
| 9 | 12165451 | 0,759 |
| 9 | 12165718 | 0,638 |
| 9 | 12166340 | 0,638 |
| 9 | 12166607 | 0,638 |
| 9 | 12166618 | 0,759 |
| 9 | 12166805 | 0,638 |
| 9 | 12167358 | 0,759 |
| 9 | 12167359 | 0,638 |
| 9 | 12167518 | 0,638 |
| 9 | 12167533 | 0,638 |
| 9 | 12167557 | 0,759 |
| 9 | 12167606 | 0,759 |
| 9 | 12167631 | 0,638 |
| 9 | 12167632 | 0,638 |
| 9 | 12167745 | 0,638 |

|   |          |       |
|---|----------|-------|
| 9 | 12167980 | 0,759 |
| 9 | 12168180 | 0,638 |
| 9 | 12168190 | 0,759 |
| 9 | 12168237 | 0,759 |
| 9 | 12168296 | 0,759 |
| 9 | 12168380 | 0,759 |
| 9 | 12168382 | 0,759 |
| 9 | 12168494 | 0,759 |
| 9 | 12168500 | 0,759 |
| 9 | 12168503 | 0,759 |
| 9 | 12168512 | 0,759 |
| 9 | 12168513 | 0,759 |
| 9 | 12168623 | 0,759 |
| 9 | 12168657 | 0,638 |
| 9 | 12168661 | 0,759 |
| 9 | 12168671 | 0,759 |
| 9 | 12168703 | 0,759 |
| 9 | 12168715 | 0,759 |
| 9 | 12169469 | 0,638 |
| 9 | 12169502 | 0,638 |
| 9 | 12169605 | 0,638 |
| 9 | 12169884 | 0,759 |
| 9 | 12170030 | 0,638 |
| 9 | 12170064 | 0,638 |
| 9 | 12170068 | 0,638 |
| 9 | 12170421 | 0,759 |
| 9 | 12172173 | 0,759 |
| 9 | 12172186 | 0,638 |
| 9 | 12172500 | 0,759 |
| 9 | 12172583 | 0,638 |
| 9 | 12173093 | 0,638 |
| 9 | 12173974 | 0,638 |
| 9 | 12174075 | 0,759 |
| 9 | 12174283 | 0,759 |
| 9 | 12174616 | 0,638 |
| 9 | 12174625 | 0,759 |
| 9 | 12174931 | 0,638 |
| 9 | 12175436 | 0,638 |
| 9 | 12176138 | 0,759 |
| 9 | 12176764 | 0,638 |
| 9 | 12176942 | 0,759 |
| 9 | 12176967 | 0,759 |
| 9 | 12177786 | 0,638 |
| 9 | 12178487 | 0,759 |
| 9 | 12178646 | 0,638 |
| 9 | 12178706 | 0,638 |
| 9 | 12178866 | 0,638 |
| 9 | 12178929 | 0,638 |

|   |          |       |
|---|----------|-------|
| 9 | 12179093 | 0,638 |
| 9 | 12179264 | 0,638 |
| 9 | 12179347 | 0,638 |
| 9 | 12179426 | 0,638 |
| 9 | 12179635 | 0,759 |
| 9 | 12179885 | 0,759 |
| 9 | 12180375 | 0,759 |
| 9 | 12180387 | 0,759 |
| 9 | 12184251 | 0,759 |
| 9 | 12186872 | 0,759 |
| 9 | 12187024 | 0,638 |
| 9 | 12188144 | 0,759 |
| 9 | 12188506 | 0,759 |
| 9 | 12188996 | 0,638 |
| 9 | 12189227 | 0,638 |
| 9 | 12191638 | 0,638 |
| 9 | 12192954 | 0,759 |
| 9 | 12193026 | 0,759 |
| 9 | 12195491 | 0,759 |
| 9 | 12195492 | 0,638 |
| 9 | 12197053 | 0,759 |
| 9 | 12197154 | 0,638 |
| 9 | 12197635 | 0,759 |
| 9 | 12197828 | 0,759 |
| 9 | 12197927 | 0,638 |
| 9 | 12199029 | 0,759 |
| 9 | 12199033 | 0,638 |
| 9 | 12199596 | 0,638 |
| 9 | 12200150 | 0,638 |
| 9 | 12200460 | 0,759 |
| 9 | 12200464 | 0,759 |
| 9 | 12200508 | 0,759 |
| 9 | 12200825 | 0,759 |
| 9 | 12200861 | 0,759 |
| 9 | 12201476 | 0,759 |
| 9 | 12201488 | 0,759 |
| 9 | 12201510 | 0,759 |
| 9 | 12202917 | 0,759 |
| 9 | 12203099 | 0,638 |
| 9 | 12204183 | 0,638 |
| 9 | 12204984 | 0,638 |
| 9 | 12205403 | 0,759 |
| 9 | 12207043 | 0,759 |
| 9 | 12207978 | 0,638 |
| 9 | 12208417 | 0,638 |
| 9 | 12208434 | 0,638 |
| 9 | 12208536 | 0,638 |
| 9 | 12208558 | 0,638 |

|   |          |       |
|---|----------|-------|
| 9 | 12208742 | 0,638 |
| 9 | 12208749 | 0,638 |
| 9 | 12208763 | 0,638 |
| 9 | 12208848 | 0,638 |
| 9 | 12209259 | 0,638 |
| 9 | 12209414 | 0,638 |
| 9 | 12210188 | 0,638 |
| 9 | 12210721 | 0,638 |
| 9 | 12210727 | 0,638 |
| 9 | 12210826 | 0,638 |
| 9 | 12210907 | 0,759 |
| 9 | 12210952 | 0,759 |
| 9 | 12211013 | 0,759 |
| 9 | 12211357 | 0,759 |
| 9 | 12211466 | 0,638 |
| 9 | 12211510 | 0,638 |
| 9 | 12211708 | 0,638 |
| 9 | 12212939 | 0,638 |
| 9 | 12213179 | 0,759 |
| 9 | 12213417 | 0,759 |
| 9 | 12214704 | 0,638 |
| 9 | 12214816 | 0,638 |
| 9 | 12214852 | 0,638 |
| 9 | 12215436 | 0,759 |
| 9 | 12215465 | 0,759 |
| 9 | 12215473 | 0,759 |
| 9 | 12215513 | 0,759 |
| 9 | 12215519 | 0,759 |
| 9 | 12216244 | 0,759 |
| 9 | 12216256 | 0,759 |
| 9 | 12216723 | 0,759 |
| 9 | 12216741 | 0,759 |
| 9 | 12219468 | 0,638 |
| 9 | 12219469 | 0,638 |
| 9 | 12219474 | 0,759 |
| 9 | 12219703 | 0,638 |
| 9 | 12219730 | 0,759 |
| 9 | 12219734 | 0,638 |
| 9 | 12219742 | 0,759 |
| 9 | 12219746 | 0,759 |
| 9 | 12219787 | 0,759 |
| 9 | 12219797 | 0,638 |
| 9 | 12219812 | 0,638 |
| 9 | 12220036 | 0,638 |
| 9 | 12220161 | 0,638 |
| 9 | 12220235 | 0,759 |
| 9 | 12220468 | 0,759 |
| 9 | 12220495 | 0,638 |

|   |          |       |
|---|----------|-------|
| 9 | 12220544 | 0,638 |
| 9 | 12220572 | 0,638 |
| 9 | 12220582 | 0,759 |
| 9 | 12220683 | 0,638 |
| 9 | 12220701 | 0,759 |
| 9 | 12220913 | 0,759 |
| 9 | 12221108 | 0,638 |
| 9 | 12221247 | 0,638 |
| 9 | 12221257 | 0,638 |
| 9 | 12221347 | 0,638 |
| 9 | 12221537 | 0,638 |
| 9 | 12221554 | 0,759 |
| 9 | 12221565 | 0,759 |
| 9 | 12221569 | 0,638 |
| 9 | 12221719 | 0,759 |
| 9 | 12221800 | 0,638 |
| 9 | 12222244 | 0,638 |
| 9 | 12222660 | 0,759 |
| 9 | 12222685 | 0,638 |
| 9 | 12222757 | 0,759 |
| 9 | 12222895 | 0,638 |
| 9 | 12222949 | 0,638 |
| 9 | 12223559 | 0,638 |
| 9 | 12223797 | 0,638 |
| 9 | 12224329 | 0,759 |
| 9 | 12224619 | 0,638 |
| 9 | 12225008 | 0,759 |
| 9 | 12225184 | 0,759 |
| 9 | 12225188 | 0,759 |
| 9 | 12225392 | 0,759 |
| 9 | 12225695 | 0,638 |
| 9 | 12225703 | 0,638 |
| 9 | 12225709 | 0,638 |
| 9 | 12225747 | 0,638 |
| 9 | 12225784 | 0,638 |
| 9 | 12225830 | 0,638 |
| 9 | 12225894 | 0,638 |
| 9 | 12225911 | 0,638 |
| 9 | 12225942 | 0,638 |
| 9 | 12226045 | 0,638 |
| 9 | 12226078 | 0,638 |
| 9 | 12226225 | 0,638 |
| 9 | 12226227 | 0,638 |
| 9 | 12227369 | 0,759 |
| 9 | 12228307 | 0,638 |
| 9 | 12228940 | 0,638 |
| 9 | 12228979 | 0,638 |
| 9 | 12229081 | 0,638 |



|   |          |       |
|---|----------|-------|
| 9 | 12229492 | 0,638 |
| 9 | 12229922 | 0,638 |
| 9 | 12230910 | 0,638 |
| 9 | 12231450 | 0,638 |
| 9 | 12231718 | 0,638 |
| 9 | 12231719 | 0,638 |
| 9 | 12231769 | 0,638 |
| 9 | 12231793 | 0,638 |
| 9 | 12231870 | 0,638 |
| 9 | 12232031 | 0,638 |
| 9 | 12233111 | 0,759 |
| 9 | 12234070 | 0,638 |
| 9 | 12234700 | 0,759 |
| 9 | 12234826 | 0,759 |
| 9 | 12235232 | 0,759 |
| 9 | 12235290 | 0,759 |
| 9 | 12235297 | 0,759 |
| 9 | 12235350 | 0,759 |
| 9 | 12235396 | 0,759 |
| 9 | 12235647 | 0,759 |
| 9 | 12235690 | 0,638 |
| 9 | 12235698 | 0,759 |
| 9 | 12235748 | 0,759 |
| 9 | 12235749 | 0,759 |
| 9 | 12235803 | 0,759 |
| 9 | 12235886 | 0,759 |
| 9 | 12235924 | 0,759 |
| 9 | 12235964 | 0,759 |
| 9 | 12235965 | 0,759 |
| 9 | 12235998 | 0,759 |
| 9 | 12236023 | 0,759 |
| 9 | 12236029 | 0,759 |
| 9 | 12236058 | 0,759 |
| 9 | 12236060 | 0,759 |
| 9 | 12236065 | 0,759 |
| 9 | 12236124 | 0,759 |
| 9 | 12236138 | 0,759 |
| 9 | 12236151 | 0,759 |
| 9 | 12236158 | 0,759 |
| 9 | 12236173 | 0,759 |
| 9 | 12236193 | 0,759 |
| 9 | 12236197 | 0,759 |
| 9 | 12236218 | 0,759 |
| 9 | 12236220 | 0,759 |
| 9 | 12236223 | 0,759 |
| 9 | 12236338 | 0,759 |
| 9 | 12236345 | 0,759 |
| 9 | 12236399 | 0,759 |

|   |          |       |
|---|----------|-------|
| 9 | 12236593 | 0,759 |
| 9 | 12236597 | 0,759 |
| 9 | 12236663 | 0,759 |
| 9 | 12236664 | 0,759 |
| 9 | 12236806 | 0,759 |
| 9 | 12236938 | 0,759 |
| 9 | 12236971 | 0,759 |
| 9 | 12237079 | 0,638 |
| 9 | 12237117 | 0,759 |
| 9 | 12238036 | 0,638 |
| 9 | 12238194 | 0,638 |
| 9 | 12238302 | 0,638 |
| 9 | 12238544 | 0,759 |
| 9 | 12238551 | 0,759 |
| 9 | 12238590 | 0,759 |
| 9 | 12238655 | 0,759 |
| 9 | 12238735 | 0,759 |
| 9 | 12238814 | 0,759 |
| 9 | 12239015 | 0,638 |
| 9 | 12239049 | 0,759 |
| 9 | 12239186 | 0,759 |
| 9 | 12239238 | 0,759 |
| 9 | 12239267 | 0,759 |
| 9 | 12239539 | 0,638 |
| 9 | 12239642 | 0,759 |
| 9 | 12239825 | 0,638 |
| 9 | 12239828 | 0,638 |
| 9 | 12240063 | 0,638 |
| 9 | 12240212 | 0,638 |
| 9 | 12240496 | 0,638 |
| 9 | 12240980 | 0,759 |
| 9 | 12241094 | 0,759 |
| 9 | 12241095 | 0,759 |
| 9 | 12241629 | 0,759 |
| 9 | 12241772 | 0,759 |
| 9 | 12241811 | 0,638 |
| 9 | 12242308 | 0,638 |
| 9 | 12242438 | 0,759 |
| 9 | 12242498 | 0,759 |
| 9 | 12242802 | 0,759 |
| 9 | 12243041 | 0,759 |
| 9 | 12243639 | 0,638 |
| 9 | 12243645 | 0,638 |
| 9 | 12243701 | 0,759 |
| 9 | 12243747 | 0,759 |
| 9 | 12243794 | 0,759 |
| 9 | 12243800 | 0,759 |
| 9 | 12244474 | 0,638 |

|   |          |       |
|---|----------|-------|
| 9 | 12244564 | 0,638 |
| 9 | 12244692 | 0,759 |
| 9 | 12244866 | 0,759 |
| 9 | 12244969 | 0,759 |
| 9 | 12244977 | 0,759 |
| 9 | 12245651 | 0,759 |
| 9 | 12245685 | 0,759 |
| 9 | 12245764 | 0,759 |
| 9 | 12245771 | 0,759 |
| 9 | 12245831 | 0,759 |
| 9 | 12246535 | 0,759 |
| 9 | 12246629 | 0,759 |
| 9 | 12246651 | 0,759 |
| 9 | 12246724 | 0,759 |
| 9 | 12246952 | 0,759 |
| 9 | 12247026 | 0,759 |
| 9 | 12247028 | 0,759 |
| 9 | 12247125 | 0,759 |
| 9 | 12247168 | 0,759 |
| 9 | 12247186 | 0,759 |
| 9 | 12247257 | 0,759 |
| 9 | 12247272 | 0,759 |
| 9 | 12247347 | 0,759 |
| 9 | 12247969 | 0,759 |
| 9 | 12247982 | 0,759 |
| 9 | 12248069 | 0,759 |
| 9 | 12248140 | 0,759 |
| 9 | 12248195 | 0,759 |
| 9 | 12248396 | 0,759 |
| 9 | 12248410 | 0,759 |
| 9 | 12248471 | 0,759 |
| 9 | 12248546 | 0,759 |
| 9 | 12248965 | 0,759 |
| 9 | 12249132 | 0,759 |
| 9 | 12249166 | 0,759 |
| 9 | 12249172 | 0,759 |
| 9 | 12249262 | 0,759 |
| 9 | 12249328 | 0,759 |
| 9 | 12249559 | 0,759 |
| 9 | 12249726 | 0,759 |
| 9 | 12249727 | 0,759 |
| 9 | 12249756 | 0,759 |
| 9 | 12249778 | 0,759 |
| 9 | 12249791 | 0,759 |
| 9 | 12249858 | 0,759 |
| 9 | 12249929 | 0,759 |
| 9 | 12249981 | 0,759 |
| 9 | 12250081 | 0,759 |

|   |          |       |
|---|----------|-------|
| 9 | 12250115 | 0,759 |
| 9 | 12250187 | 0,759 |
| 9 | 12250423 | 0,759 |
| 9 | 12250466 | 0,759 |
| 9 | 12251186 | 0,759 |
| 9 | 12251213 | 0,759 |
| 9 | 12251469 | 0,759 |
| 9 | 12251760 | 0,759 |
| 9 | 12252021 | 0,759 |
| 9 | 12252057 | 0,759 |
| 9 | 12252149 | 0,759 |
| 9 | 12252673 | 0,759 |
| 9 | 12252789 | 0,759 |
| 9 | 12252969 | 0,759 |
| 9 | 12253200 | 0,759 |
| 9 | 12253255 | 0,759 |
| 9 | 12253286 | 0,759 |
| 9 | 12253290 | 0,759 |
| 9 | 12253296 | 0,759 |
| 9 | 12253368 | 0,759 |
| 9 | 12253393 | 0,759 |
| 9 | 12253421 | 0,759 |
| 9 | 12254129 | 0,638 |
| 9 | 12257293 | 0,759 |
| 9 | 12257358 | 0,759 |
| 9 | 12257531 | 0,759 |
| 9 | 12257537 | 0,759 |
| 9 | 12257557 | 0,759 |
| 9 | 12257577 | 0,759 |
| 9 | 12257600 | 0,759 |
| 9 | 12257673 | 0,759 |
| 9 | 12257739 | 0,759 |
| 9 | 12258152 | 0,759 |
| 9 | 12258260 | 0,759 |
| 9 | 12258316 | 0,759 |
| 9 | 12258403 | 0,638 |
| 9 | 12258413 | 0,638 |
| 9 | 12258428 | 0,638 |
| 9 | 12258440 | 0,638 |
| 9 | 12258441 | 0,638 |
| 9 | 12258608 | 0,638 |
| 9 | 12258685 | 0,759 |
| 9 | 12258692 | 0,759 |
| 9 | 12258703 | 0,759 |
| 9 | 12258705 | 0,759 |
| 9 | 12258790 | 0,638 |
| 9 | 12258817 | 0,638 |
| 9 | 12258970 | 0,638 |

|   |          |       |
|---|----------|-------|
| 9 | 12259186 | 0,759 |
| 9 | 12259187 | 0,759 |
| 9 | 12259591 | 0,759 |
| 9 | 12259782 | 0,759 |
| 9 | 12259906 | 0,759 |
| 9 | 12260158 | 0,759 |
| 9 | 12260517 | 0,759 |
| 9 | 12260563 | 0,759 |
| 9 | 12260837 | 0,759 |
| 9 | 12261063 | 0,759 |
| 9 | 12261587 | 0,759 |
| 9 | 12261658 | 0,638 |
| 9 | 12262298 | 0,638 |
| 9 | 12262952 | 0,638 |
| 9 | 12263708 | 0,759 |
| 9 | 12263717 | 0,638 |
| 9 | 12263779 | 0,759 |
| 9 | 12264125 | 0,759 |
| 9 | 12264149 | 0,759 |
| 9 | 12264696 | 0,638 |
| 9 | 12264862 | 0,638 |
| 9 | 12265029 | 0,759 |
| 9 | 12265049 | 0,759 |
| 9 | 12265168 | 0,759 |
| 9 | 12265208 | 0,638 |
| 9 | 12265219 | 0,638 |
| 9 | 12265226 | 0,638 |
| 9 | 12265342 | 0,638 |
| 9 | 12265367 | 0,638 |
| 9 | 12266365 | 0,759 |
| 9 | 12267555 | 0,638 |
| 9 | 12267795 | 0,759 |
| 9 | 12267980 | 0,638 |
| 9 | 12268083 | 0,638 |
| 9 | 12268243 | 0,759 |
| 9 | 12269098 | 0,759 |
| 9 | 12269192 | 0,759 |
| 9 | 12269261 | 0,759 |
| 9 | 12269297 | 0,759 |
| 9 | 12270004 | 0,759 |
| 9 | 12270231 | 0,759 |
| 9 | 12270340 | 0,759 |
| 9 | 12270342 | 0,759 |
| 9 | 12270357 | 0,759 |
| 9 | 12270369 | 0,759 |
| 9 | 12270439 | 0,759 |
| 9 | 12270608 | 0,759 |
| 9 | 12270687 | 0,759 |

|   |          |       |
|---|----------|-------|
| 9 | 12271085 | 0,759 |
| 9 | 12271151 | 0,638 |
| 9 | 12271493 | 0,759 |
| 9 | 12271657 | 0,759 |
| 9 | 12271661 | 0,759 |
| 9 | 12271701 | 0,759 |
| 9 | 12272585 | 0,759 |
| 9 | 12272608 | 0,759 |
| 9 | 12272633 | 0,638 |
| 9 | 12272786 | 0,638 |
| 9 | 12272846 | 0,759 |
| 9 | 12273111 | 0,759 |
| 9 | 12273121 | 0,759 |
| 9 | 12273135 | 0,759 |
| 9 | 12273159 | 0,759 |
| 9 | 12273317 | 0,638 |
| 9 | 12273657 | 0,759 |
| 9 | 12273718 | 0,759 |
| 9 | 12273847 | 0,759 |
| 9 | 12274147 | 0,638 |
| 9 | 12274157 | 0,759 |
| 9 | 12274191 | 0,759 |
| 9 | 12274224 | 0,759 |
| 9 | 12274356 | 0,759 |
| 9 | 12274361 | 0,759 |
| 9 | 12274483 | 0,759 |
| 9 | 12274542 | 0,638 |
| 9 | 12274616 | 0,759 |
| 9 | 12274624 | 0,759 |
| 9 | 12274679 | 0,759 |
| 9 | 12274690 | 0,638 |
| 9 | 12274735 | 0,759 |
| 9 | 12275055 | 0,638 |
| 9 | 12275299 | 0,759 |
| 9 | 12275388 | 0,638 |
| 9 | 12275402 | 0,638 |
| 9 | 12275420 | 0,638 |
| 9 | 12275562 | 0,638 |
| 9 | 12275574 | 0,638 |
| 9 | 12275697 | 0,759 |
| 9 | 12275728 | 0,638 |
| 9 | 12275825 | 0,638 |
| 9 | 12276122 | 0,759 |
| 9 | 12276177 | 0,638 |
| 9 | 12276223 | 0,759 |
| 9 | 12276241 | 0,638 |
| 9 | 12276314 | 0,759 |
| 9 | 12276339 | 0,638 |

|   |          |       |
|---|----------|-------|
| 9 | 12276572 | 0,759 |
| 9 | 12276686 | 0,759 |
| 9 | 12276790 | 0,638 |
| 9 | 12277069 | 0,638 |
| 9 | 12277529 | 0,759 |
| 9 | 12277844 | 0,638 |
| 9 | 12277912 | 0,638 |
| 9 | 12278018 | 0,638 |
| 9 | 12278058 | 0,759 |
| 9 | 12278365 | 0,638 |
| 9 | 12278783 | 0,638 |
| 9 | 12278887 | 0,638 |
| 9 | 12278897 | 0,638 |
| 9 | 12278898 | 0,759 |
| 9 | 12279722 | 0,759 |
| 9 | 12280317 | 0,759 |
| 9 | 12280416 | 0,759 |
| 9 | 12280524 | 0,759 |
| 9 | 12280564 | 0,759 |
| 9 | 12280576 | 0,759 |
| 9 | 12280598 | 0,759 |
| 9 | 12280600 | 0,759 |
| 9 | 12280635 | 0,759 |
| 9 | 12280703 | 0,759 |
| 9 | 12280832 | 0,759 |
| 9 | 12280874 | 0,759 |
| 9 | 12281097 | 0,759 |
| 9 | 12281107 | 0,759 |
| 9 | 12281250 | 0,759 |
| 9 | 12281272 | 0,759 |
| 9 | 12281297 | 0,759 |
| 9 | 12281817 | 0,759 |
| 9 | 12281818 | 0,759 |
| 9 | 12282066 | 0,759 |
| 9 | 12282110 | 0,759 |
| 9 | 12282135 | 0,759 |
| 9 | 12282192 | 0,759 |
| 9 | 12282398 | 0,759 |
| 9 | 12282418 | 0,759 |
| 9 | 12282476 | 0,759 |
| 9 | 12282554 | 0,759 |
| 9 | 12282640 | 0,759 |
| 9 | 12282660 | 0,759 |
| 9 | 12282661 | 0,759 |
| 9 | 12282847 | 0,759 |
| 9 | 12282885 | 0,759 |
| 9 | 12282945 | 0,759 |
| 9 | 12282948 | 0,759 |

|   |          |       |
|---|----------|-------|
| 9 | 12282964 | 0,759 |
| 9 | 12283071 | 0,759 |
| 9 | 12283074 | 0,759 |
| 9 | 12283146 | 0,759 |
| 9 | 12283226 | 0,759 |
| 9 | 12283636 | 0,759 |
| 9 | 12283720 | 0,759 |
| 9 | 12283916 | 0,759 |
| 9 | 12284194 | 0,759 |
| 9 | 12284419 | 0,759 |
| 9 | 12285318 | 0,759 |
| 9 | 12286390 | 0,759 |
| 9 | 12286697 | 0,759 |
| 9 | 12286716 | 0,759 |
| 9 | 12286730 | 0,759 |
| 9 | 12286847 | 0,759 |
| 9 | 12286970 | 0,759 |
| 9 | 12287222 | 0,759 |
| 9 | 12287251 | 0,759 |
| 9 | 12287272 | 0,759 |
| 9 | 12287273 | 0,759 |
| 9 | 12287274 | 0,759 |
| 9 | 12287281 | 0,759 |
| 9 | 12287306 | 0,759 |
| 9 | 12287319 | 0,759 |
| 9 | 12287324 | 0,759 |
| 9 | 12287330 | 0,759 |
| 9 | 12287337 | 0,759 |
| 9 | 12287406 | 0,759 |
| 9 | 12287494 | 0,759 |
| 9 | 12287575 | 0,759 |
| 9 | 12287600 | 0,759 |
| 9 | 12287696 | 0,759 |
| 9 | 12288445 | 0,759 |
| 9 | 12288451 | 0,759 |
| 9 | 12288544 | 0,759 |
| 9 | 12288550 | 0,759 |
| 9 | 12288789 | 0,759 |
| 9 | 12288820 | 0,759 |
| 9 | 12289000 | 0,759 |
| 9 | 12289030 | 0,759 |
| 9 | 12289048 | 0,759 |
| 9 | 12289049 | 0,759 |
| 9 | 12289058 | 0,759 |
| 9 | 12289061 | 0,759 |
| 9 | 12289135 | 0,759 |
| 9 | 12289139 | 0,759 |
| 9 | 12289167 | 0,759 |



|   |          |       |
|---|----------|-------|
| 9 | 12289168 | 0,759 |
| 9 | 12289191 | 0,759 |
| 9 | 12289246 | 0,759 |
| 9 | 12289254 | 0,759 |
| 9 | 12289453 | 0,759 |
| 9 | 12289495 | 0,759 |
| 9 | 12289535 | 0,759 |
| 9 | 12289539 | 0,759 |
| 9 | 12289559 | 0,759 |
| 9 | 12289592 | 0,759 |
| 9 | 12289903 | 0,759 |
| 9 | 12289982 | 0,759 |
| 9 | 12290238 | 0,759 |
| 9 | 12290261 | 0,759 |
| 9 | 12290291 | 0,759 |
| 9 | 12290353 | 0,759 |
| 9 | 12300860 | 0,759 |
| 9 | 12301375 | 0,759 |
| 9 | 12301528 | 0,759 |
| 9 | 12301836 | 0,759 |
| 9 | 12301865 | 0,638 |
| 9 | 12301897 | 0,638 |
| 9 | 12301947 | 0,759 |
| 9 | 12301966 | 0,759 |
| 9 | 12302017 | 0,759 |
| 9 | 12302023 | 0,759 |
| 9 | 12302024 | 0,759 |
| 9 | 12302053 | 0,759 |
| 9 | 12302057 | 0,759 |
| 9 | 12302084 | 0,759 |
| 9 | 12302121 | 0,759 |
| 9 | 12302125 | 0,759 |
| 9 | 12302196 | 0,759 |
| 9 | 12302306 | 0,759 |
| 9 | 12302351 | 0,759 |
| 9 | 12302394 | 0,759 |
| 9 | 12302406 | 0,638 |
| 9 | 12302585 | 0,759 |
| 9 | 12302586 | 0,759 |
| 9 | 12302593 | 0,759 |
| 9 | 12302681 | 0,759 |
| 9 | 12302685 | 0,759 |
| 9 | 12302688 | 0,759 |
| 9 | 12302689 | 0,759 |
| 9 | 12302810 | 0,759 |
| 9 | 12302888 | 0,759 |
| 9 | 12302892 | 0,759 |
| 9 | 12304024 | 0,759 |

|   |          |       |
|---|----------|-------|
| 9 | 12304050 | 0,759 |
| 9 | 12304319 | 0,638 |
| 9 | 12304406 | 0,638 |
| 9 | 12305007 | 0,759 |
| 9 | 12305104 | 0,759 |
| 9 | 12305357 | 0,759 |
| 9 | 12305717 | 0,759 |
| 9 | 12306813 | 0,638 |
| 9 | 12306938 | 0,638 |
| 9 | 12306971 | 0,638 |
| 9 | 12306996 | 0,759 |
| 9 | 12308088 | 0,759 |
| 9 | 12317698 | 0,638 |
| 9 | 12322285 | 0,759 |
| 9 | 12328152 | 0,759 |
| 9 | 12347483 | 0,759 |
| 9 | 12392204 | 0,638 |
| 9 | 12418481 | 0,638 |
| 9 | 12419009 | 0,638 |
| 9 | 12419914 | 0,638 |
| 9 | 12420170 | 0,638 |
| 9 | 12420180 | 0,638 |
| 9 | 12420448 | 0,638 |
| 9 | 12420497 | 0,638 |
| 9 | 12421139 | 0,638 |
| 9 | 12421179 | 0,638 |
| 9 | 12421324 | 0,638 |
| 9 | 12421589 | 0,638 |
| 9 | 12421751 | 0,638 |
| 9 | 12422008 | 0,638 |
| 9 | 12422252 | 0,638 |
| 9 | 12422260 | 0,638 |
| 9 | 12422269 | 0,638 |
| 9 | 12422316 | 0,638 |
| 9 | 12422350 | 0,638 |
| 9 | 12422465 | 0,638 |
| 9 | 12422606 | 0,638 |
| 9 | 12423076 | 0,638 |
| 9 | 12423477 | 0,638 |
| 9 | 12423657 | 0,638 |
| 9 | 12423727 | 0,638 |
| 9 | 12424327 | 0,638 |
| 9 | 12424513 | 0,638 |
| 9 | 12424568 | 0,638 |
| 9 | 12424625 | 0,638 |
| 9 | 12424756 | 0,638 |
| 9 | 12424934 | 0,638 |
| 9 | 12424971 | 0,638 |

|   |          |       |
|---|----------|-------|
| 9 | 12425179 | 0,638 |
| 9 | 12426015 | 0,638 |
| 9 | 12426147 | 0,638 |
| 9 | 12426209 | 0,638 |
| 9 | 12426238 | 0,638 |
| 9 | 12426387 | 0,638 |
| 9 | 12426408 | 0,638 |
| 9 | 12426547 | 0,638 |
| 9 | 12426573 | 0,638 |
| 9 | 12426693 | 0,638 |
| 9 | 12426872 | 0,638 |
| 9 | 12426893 | 0,638 |
| 9 | 12427240 | 0,638 |
| 9 | 12427336 | 0,638 |
| 9 | 12427369 | 0,638 |
| 9 | 12427591 | 0,638 |
| 9 | 12427733 | 0,638 |
| 9 | 12427802 | 0,638 |
| 9 | 12427813 | 0,638 |
| 9 | 12427899 | 0,638 |
| 9 | 12427930 | 0,638 |
| 9 | 12428223 | 0,638 |
| 9 | 12428400 | 0,638 |
| 9 | 12428402 | 0,638 |
| 9 | 12428486 | 0,638 |
| 9 | 12429297 | 0,638 |
| 9 | 12429369 | 0,638 |
| 9 | 12429673 | 0,638 |
| 9 | 12429725 | 0,638 |
| 9 | 12429745 | 0,638 |
| 9 | 12429871 | 0,638 |
| 9 | 12429985 | 0,638 |
| 9 | 12430354 | 0,638 |
| 9 | 12430417 | 0,638 |
| 9 | 12430850 | 0,759 |
| 9 | 12434820 | 0,638 |
| 9 | 12434876 | 0,638 |
| 9 | 12435163 | 0,759 |
| 9 | 12435654 | 0,638 |
| 9 | 12435681 | 0,638 |
| 9 | 12435693 | 0,638 |
| 9 | 12435802 | 0,638 |
| 9 | 12435809 | 0,638 |
| 9 | 12435977 | 0,638 |
| 9 | 12435995 | 0,638 |
| 9 | 12436022 | 0,638 |
| 9 | 12436031 | 0,638 |
| 9 | 12436188 | 0,638 |

|   |          |       |
|---|----------|-------|
| 9 | 12436246 | 0,638 |
| 9 | 12436477 | 0,638 |
| 9 | 12437148 | 0,638 |
| 9 | 12437182 | 0,638 |
| 9 | 12437205 | 0,638 |
| 9 | 12437329 | 0,638 |
| 9 | 12437757 | 0,638 |
| 9 | 12437810 | 0,638 |
| 9 | 12437812 | 0,638 |
| 9 | 12437831 | 0,638 |
| 9 | 12437834 | 0,638 |
| 9 | 12437985 | 0,638 |
| 9 | 12438002 | 0,638 |
| 9 | 12438186 | 0,638 |
| 9 | 12438252 | 0,638 |
| 9 | 12438356 | 0,638 |
| 9 | 12438554 | 0,638 |
| 9 | 12438562 | 0,638 |
| 9 | 12439236 | 0,638 |
| 9 | 12440012 | 0,638 |
| 9 | 12440054 | 0,638 |
| 9 | 12440094 | 0,638 |
| 9 | 12440100 | 0,638 |
| 9 | 12440134 | 0,638 |
| 9 | 12440206 | 0,638 |
| 9 | 12440225 | 0,638 |
| 9 | 12440264 | 0,638 |
| 9 | 12440297 | 0,638 |
| 9 | 12440342 | 0,638 |
| 9 | 12440511 | 0,638 |
| 9 | 12440650 | 0,638 |
| 9 | 12440692 | 0,638 |
| 9 | 12440722 | 0,638 |
| 9 | 12440751 | 0,638 |
| 9 | 12440819 | 0,638 |
| 9 | 12440846 | 0,638 |
| 9 | 12440914 | 0,638 |
| 9 | 12440922 | 0,638 |
| 9 | 12441914 | 0,638 |
| 9 | 12442029 | 0,638 |
| 9 | 12442074 | 0,638 |
| 9 | 12442262 | 0,638 |
| 9 | 12442435 | 0,638 |
| 9 | 12442879 | 0,638 |
| 9 | 12442912 | 0,638 |
| 9 | 12442949 | 0,638 |
| 9 | 12443156 | 0,638 |
| 9 | 12443173 | 0,638 |

|   |          |       |
|---|----------|-------|
| 9 | 12443235 | 0,638 |
| 9 | 12443254 | 0,638 |
| 9 | 12443265 | 0,638 |
| 9 | 12443363 | 0,638 |
| 9 | 12443608 | 0,638 |
| 9 | 12443631 | 0,638 |
| 9 | 12444214 | 0,638 |
| 9 | 12444280 | 0,638 |
| 9 | 12444337 | 0,638 |
| 9 | 12444490 | 0,638 |
| 9 | 12444578 | 0,638 |
| 9 | 12445145 | 0,638 |
| 9 | 12445353 | 0,638 |
| 9 | 12445369 | 0,638 |
| 9 | 12445376 | 0,638 |
| 9 | 12445474 | 0,638 |
| 9 | 12446007 | 0,638 |
| 9 | 12446122 | 0,638 |
| 9 | 12446171 | 0,638 |
| 9 | 12446246 | 0,638 |
| 9 | 12446314 | 0,638 |
| 9 | 12446320 | 0,638 |
| 9 | 12446369 | 0,638 |
| 9 | 12446516 | 0,638 |
| 9 | 12446530 | 0,638 |
| 9 | 12446868 | 0,638 |
| 9 | 12446908 | 0,638 |
| 9 | 12447039 | 0,638 |
| 9 | 12447061 | 0,638 |
| 9 | 12447122 | 0,638 |
| 9 | 12447198 | 0,638 |
| 9 | 12447242 | 0,638 |
| 9 | 12447243 | 0,638 |
| 9 | 12447254 | 0,638 |
| 9 | 12447339 | 0,638 |
| 9 | 12447724 | 0,638 |
| 9 | 12447730 | 0,638 |
| 9 | 12447748 | 0,638 |
| 9 | 12447764 | 0,638 |
| 9 | 12447792 | 0,638 |
| 9 | 12447836 | 0,638 |
| 9 | 12447854 | 0,638 |
| 9 | 12448209 | 0,638 |
| 9 | 12448244 | 0,638 |
| 9 | 12448838 | 0,638 |
| 9 | 12448866 | 0,638 |
| 9 | 12448867 | 0,638 |
| 9 | 12448871 | 0,638 |

|   |          |       |
|---|----------|-------|
| 9 | 12448924 | 0,638 |
| 9 | 12449044 | 0,638 |
| 9 | 12449056 | 0,638 |
| 9 | 12449062 | 0,638 |
| 9 | 12449071 | 0,638 |
| 9 | 12449079 | 0,638 |
| 9 | 12449317 | 0,638 |
| 9 | 12449386 | 0,638 |
| 9 | 12449573 | 0,638 |
| 9 | 12449770 | 0,638 |
| 9 | 12449775 | 0,638 |
| 9 | 12450295 | 0,638 |
| 9 | 12450497 | 0,638 |
| 9 | 12450838 | 0,638 |
| 9 | 12451131 | 0,638 |
| 9 | 12451252 | 0,638 |
| 9 | 12451328 | 0,638 |
| 9 | 12451347 | 0,638 |
| 9 | 12451370 | 0,638 |
| 9 | 12451426 | 0,638 |
| 9 | 12451436 | 0,638 |
| 9 | 12451440 | 0,638 |
| 9 | 12451582 | 0,638 |
| 9 | 12451593 | 0,638 |
| 9 | 12451603 | 0,638 |
| 9 | 12451608 | 0,638 |
| 9 | 12451996 | 0,638 |
| 9 | 12452255 | 0,638 |
| 9 | 12452760 | 0,638 |
| 9 | 12452926 | 0,638 |
| 9 | 12453482 | 0,638 |
| 9 | 12453531 | 0,638 |
| 9 | 12454064 | 0,638 |
| 9 | 12454065 | 0,638 |
| 9 | 12455249 | 0,638 |
| 9 | 12455674 | 0,638 |
| 9 | 12455970 | 0,638 |
| 9 | 12456009 | 0,638 |
| 9 | 12456150 | 0,638 |
| 9 | 12456541 | 0,638 |
| 9 | 12457425 | 0,759 |
| 9 | 12457703 | 0,638 |
| 9 | 12458122 | 0,759 |
| 9 | 12458575 | 0,638 |
| 9 | 12458602 | 0,638 |
| 9 | 12458604 | 0,638 |
| 9 | 12458669 | 0,638 |
| 9 | 12459349 | 0,638 |

|   |          |       |
|---|----------|-------|
| 9 | 12459546 | 0,759 |
| 9 | 12459625 | 0,638 |
| 9 | 12459647 | 0,638 |
| 9 | 12459829 | 0,759 |
| 9 | 12460723 | 0,638 |
| 9 | 12461019 | 0,759 |
| 9 | 12461117 | 0,759 |
| 9 | 12461118 | 0,759 |
| 9 | 12461218 | 0,759 |
| 9 | 12461332 | 0,638 |
| 9 | 12461733 | 0,638 |
| 9 | 12461857 | 0,759 |
| 9 | 12461873 | 0,759 |
| 9 | 12461888 | 0,759 |
| 9 | 12462232 | 0,759 |
| 9 | 12462627 | 0,759 |
| 9 | 12462973 | 0,759 |
| 9 | 12462991 | 0,638 |
| 9 | 12462992 | 0,638 |
| 9 | 12462993 | 0,638 |
| 9 | 12463132 | 0,759 |
| 9 | 12463978 | 0,638 |
| 9 | 12463994 | 0,759 |
| 9 | 12464251 | 0,759 |
| 9 | 12464254 | 0,759 |
| 9 | 12464258 | 0,638 |
| 9 | 12464319 | 0,759 |
| 9 | 12464336 | 0,759 |
| 9 | 12464562 | 0,759 |
| 9 | 12464582 | 0,759 |
| 9 | 12465272 | 0,759 |
| 9 | 12465439 | 0,759 |
| 9 | 12465687 | 0,759 |
| 9 | 12466018 | 0,759 |
| 9 | 12466063 | 0,759 |
| 9 | 12466389 | 0,759 |
| 9 | 12467147 | 0,759 |
| 9 | 12467304 | 0,638 |
| 9 | 12467885 | 0,638 |
| 9 | 12468099 | 0,759 |
| 9 | 12468182 | 0,638 |
| 9 | 12468529 | 0,759 |
| 9 | 12468594 | 0,759 |
| 9 | 12468666 | 0,759 |
| 9 | 12469040 | 0,759 |
| 9 | 12469133 | 0,759 |
| 9 | 12469134 | 0,759 |
| 9 | 12469196 | 0,638 |

|   |          |       |
|---|----------|-------|
| 9 | 12469315 | 0,638 |
| 9 | 12469757 | 0,759 |
| 9 | 12470271 | 0,759 |
| 9 | 12471037 | 0,759 |
| 9 | 12471061 | 0,759 |
| 9 | 12471252 | 0,759 |
| 9 | 12471339 | 0,638 |
| 9 | 12471585 | 0,759 |
| 9 | 12471593 | 0,759 |
| 9 | 12471627 | 0,638 |
| 9 | 12471674 | 0,759 |
| 9 | 12472025 | 0,759 |
| 9 | 12472032 | 0,638 |
| 9 | 12472065 | 0,759 |
| 9 | 12472408 | 0,759 |
| 9 | 12472901 | 0,638 |
| 9 | 12472906 | 0,638 |
| 9 | 12472908 | 0,638 |
| 9 | 12472917 | 0,759 |
| 9 | 12472978 | 0,638 |
| 9 | 12473104 | 0,638 |
| 9 | 12473120 | 0,638 |
| 9 | 12473152 | 0,638 |
| 9 | 12473188 | 0,759 |
| 9 | 12473234 | 0,759 |
| 9 | 12473245 | 0,638 |
| 9 | 12473304 | 0,759 |
| 9 | 12473316 | 0,759 |
| 9 | 12473366 | 0,759 |
| 9 | 12473371 | 0,638 |
| 9 | 12473407 | 0,759 |
| 9 | 12473423 | 0,759 |
| 9 | 12473790 | 0,759 |
| 9 | 12473805 | 0,759 |
| 9 | 12473806 | 0,759 |
| 9 | 12473862 | 0,759 |
| 9 | 12473887 | 0,759 |
| 9 | 12473964 | 0,638 |
| 9 | 12474312 | 0,638 |
| 9 | 12474368 | 0,638 |
| 9 | 12474586 | 0,759 |
| 9 | 12474594 | 0,759 |
| 9 | 12474633 | 0,759 |
| 9 | 12474897 | 0,638 |
| 9 | 12475077 | 0,759 |
| 9 | 12475085 | 0,638 |
| 9 | 12475270 | 0,638 |
| 9 | 12475306 | 0,759 |



|   |          |       |
|---|----------|-------|
| 9 | 12475328 | 0,638 |
| 9 | 12475395 | 0,759 |
| 9 | 12475973 | 0,759 |
| 9 | 12475994 | 0,759 |
| 9 | 12476047 | 0,759 |
| 9 | 12476196 | 0,759 |
| 9 | 12476216 | 0,759 |
| 9 | 12476287 | 0,638 |
| 9 | 12476370 | 0,638 |
| 9 | 12476375 | 0,638 |
| 9 | 12476482 | 0,759 |
| 9 | 12476539 | 0,759 |
| 9 | 12476717 | 0,638 |
| 9 | 12476772 | 0,759 |
| 9 | 12476874 | 0,638 |
| 9 | 12477373 | 0,638 |
| 9 | 12477405 | 0,638 |
| 9 | 12477442 | 0,638 |
| 9 | 12477504 | 0,638 |
| 9 | 12477515 | 0,638 |
| 9 | 12477533 | 0,638 |
| 9 | 12477538 | 0,638 |
| 9 | 12477644 | 0,638 |
| 9 | 12477675 | 0,638 |
| 9 | 12477679 | 0,638 |
| 9 | 12477682 | 0,638 |
| 9 | 12477783 | 0,759 |
| 9 | 12477797 | 0,759 |
| 9 | 12477828 | 0,638 |
| 9 | 12477863 | 0,638 |
| 9 | 12477988 | 0,638 |
| 9 | 12477997 | 0,759 |
| 9 | 12478000 | 0,759 |
| 9 | 12478004 | 0,638 |
| 9 | 12478158 | 0,638 |
| 9 | 12478163 | 0,638 |
| 9 | 12478177 | 0,638 |
| 9 | 12478523 | 0,759 |
| 9 | 12478539 | 0,759 |
| 9 | 12478551 | 0,759 |
| 9 | 12478553 | 0,759 |
| 9 | 12478570 | 0,638 |
| 9 | 12478678 | 0,759 |
| 9 | 12478892 | 0,638 |
| 9 | 12478964 | 0,759 |
| 9 | 12479044 | 0,638 |
| 9 | 12479054 | 0,759 |
| 9 | 12479143 | 0,759 |

|   |          |       |
|---|----------|-------|
| 9 | 12479591 | 0,638 |
| 9 | 12479593 | 0,638 |
| 9 | 12479595 | 0,638 |
| 9 | 12479598 | 0,638 |
| 9 | 12479945 | 0,638 |
| 9 | 12479973 | 0,759 |
| 9 | 12480110 | 0,759 |
| 9 | 12480337 | 0,638 |
| 9 | 12480344 | 0,638 |
| 9 | 12480400 | 0,638 |
| 9 | 12480405 | 0,638 |
| 9 | 12480451 | 0,759 |
| 9 | 12480566 | 0,638 |
| 9 | 12480575 | 0,759 |
| 9 | 12480779 | 0,759 |
| 9 | 12480902 | 0,638 |
| 9 | 12480944 | 0,638 |
| 9 | 12481108 | 0,638 |
| 9 | 12481121 | 0,638 |
| 9 | 12481269 | 0,638 |
| 9 | 12481300 | 0,759 |
| 9 | 12481370 | 0,638 |
| 9 | 12481430 | 0,759 |
| 9 | 12481442 | 0,759 |
| 9 | 12481443 | 0,759 |
| 9 | 12481448 | 0,638 |
| 9 | 12481559 | 0,638 |
| 9 | 12481562 | 0,638 |
| 9 | 12481573 | 0,759 |
| 9 | 12481595 | 0,759 |
| 9 | 12481597 | 0,759 |
| 9 | 12481617 | 0,759 |
| 9 | 12481618 | 0,759 |
| 9 | 12481621 | 0,759 |
| 9 | 12481646 | 0,759 |
| 9 | 12481662 | 0,638 |
| 9 | 12481684 | 0,759 |
| 9 | 12481712 | 0,759 |
| 9 | 12481737 | 0,759 |
| 9 | 12481926 | 0,638 |
| 9 | 12481927 | 0,638 |
| 9 | 12482185 | 0,638 |
| 9 | 12482462 | 0,759 |
| 9 | 12482464 | 0,759 |
| 9 | 12482499 | 0,638 |
| 9 | 12482633 | 0,638 |
| 9 | 12482747 | 0,638 |
| 9 | 12482810 | 0,759 |

|   |          |       |
|---|----------|-------|
| 9 | 12482835 | 0,759 |
| 9 | 12482841 | 0,759 |
| 9 | 12483009 | 0,759 |
| 9 | 12483128 | 0,638 |
| 9 | 12483207 | 0,759 |
| 9 | 12483628 | 0,759 |
| 9 | 12483973 | 0,759 |
| 9 | 12484246 | 0,759 |
| 9 | 12484611 | 0,638 |
| 9 | 12484654 | 0,759 |
| 9 | 12484890 | 0,638 |
| 9 | 12484986 | 0,638 |
| 9 | 12484989 | 0,638 |
| 9 | 12485021 | 0,638 |
| 9 | 12485094 | 0,759 |
| 9 | 12485317 | 0,638 |
| 9 | 12485331 | 0,759 |
| 9 | 12485459 | 0,638 |
| 9 | 12485471 | 0,638 |
| 9 | 12485494 | 0,638 |
| 9 | 12485536 | 0,759 |
| 9 | 12485544 | 0,759 |
| 9 | 12485702 | 0,759 |
| 9 | 12486146 | 0,638 |
| 9 | 12486191 | 0,759 |
| 9 | 12486231 | 0,638 |
| 9 | 12486486 | 0,638 |
| 9 | 12486725 | 0,638 |
| 9 | 12487021 | 0,759 |
| 9 | 12487076 | 0,759 |
| 9 | 12487642 | 0,638 |
| 9 | 12487643 | 0,638 |
| 9 | 12487850 | 0,638 |
| 9 | 12487874 | 0,638 |
| 9 | 12487918 | 0,759 |
| 9 | 12487931 | 0,638 |
| 9 | 12487964 | 0,638 |
| 9 | 12488229 | 0,759 |
| 9 | 12488380 | 0,638 |
| 9 | 12488427 | 0,759 |
| 9 | 12488443 | 0,759 |
| 9 | 12488444 | 0,759 |
| 9 | 12488452 | 0,759 |
| 9 | 12488471 | 0,759 |
| 9 | 12488647 | 0,759 |
| 9 | 12488694 | 0,638 |
| 9 | 12488834 | 0,759 |
| 9 | 12488937 | 0,759 |

|   |          |       |
|---|----------|-------|
| 9 | 12489003 | 0,638 |
| 9 | 12489102 | 0,638 |
| 9 | 12489123 | 0,638 |
| 9 | 12489476 | 0,638 |
| 9 | 12489516 | 0,638 |
| 9 | 12489519 | 0,759 |
| 9 | 12490430 | 0,638 |
| 9 | 12490557 | 0,759 |
| 9 | 12490920 | 0,759 |
| 9 | 12490946 | 0,638 |
| 9 | 12491076 | 0,638 |
| 9 | 12491328 | 0,638 |
| 9 | 12491368 | 0,638 |
| 9 | 12491423 | 0,638 |
| 9 | 12491762 | 0,759 |
| 9 | 12491870 | 0,759 |
| 9 | 12492332 | 0,638 |
| 9 | 12492339 | 0,759 |
| 9 | 12492418 | 0,638 |
| 9 | 12492625 | 0,638 |
| 9 | 12492730 | 0,759 |
| 9 | 12492856 | 0,759 |
| 9 | 12493644 | 0,759 |
| 9 | 12494261 | 0,759 |
| 9 | 12494344 | 0,638 |
| 9 | 12494542 | 0,759 |
| 9 | 12494963 | 0,759 |
| 9 | 12495071 | 0,759 |
| 9 | 12495108 | 0,759 |
| 9 | 12495243 | 0,638 |
| 9 | 12495279 | 0,759 |
| 9 | 12495366 | 0,638 |
| 9 | 12495407 | 0,759 |
| 9 | 12495408 | 0,759 |
| 9 | 12495421 | 0,759 |
| 9 | 12495473 | 0,759 |
| 9 | 12495474 | 0,759 |
| 9 | 12495796 | 0,759 |
| 9 | 12495874 | 0,638 |
| 9 | 12495916 | 0,759 |
| 9 | 12495986 | 0,759 |
| 9 | 12496000 | 0,759 |
| 9 | 12496076 | 0,638 |
| 9 | 12496316 | 0,759 |
| 9 | 12496433 | 0,638 |
| 9 | 12496494 | 0,759 |
| 9 | 12496656 | 0,638 |
| 9 | 12496732 | 0,638 |

|   |          |       |
|---|----------|-------|
| 9 | 12496801 | 0,638 |
| 9 | 12496875 | 0,759 |
| 9 | 12496906 | 0,759 |
| 9 | 12496924 | 0,638 |
| 9 | 12497089 | 0,759 |
| 9 | 12497115 | 0,759 |
| 9 | 12497356 | 0,638 |
| 9 | 12497436 | 0,638 |
| 9 | 12497584 | 0,759 |
| 9 | 12497591 | 0,759 |
| 9 | 12497706 | 0,638 |
| 9 | 12497829 | 0,759 |
| 9 | 12497889 | 0,759 |
| 9 | 12498192 | 0,638 |
| 9 | 12498253 | 0,759 |
| 9 | 12498286 | 0,638 |
| 9 | 12498369 | 0,638 |
| 9 | 12498449 | 0,638 |
| 9 | 12498508 | 0,638 |
| 9 | 12498527 | 0,638 |
| 9 | 12498669 | 0,638 |
| 9 | 12499124 | 0,759 |
| 9 | 12499145 | 0,759 |
| 9 | 12499152 | 0,759 |
| 9 | 12499184 | 0,759 |
| 9 | 12499200 | 0,759 |
| 9 | 12499287 | 0,759 |
| 9 | 12499330 | 0,759 |
| 9 | 12499351 | 0,759 |
| 9 | 12499356 | 0,759 |
| 9 | 12499853 | 0,759 |
| 9 | 12499865 | 0,759 |
| 9 | 12500076 | 0,759 |
| 9 | 12500082 | 0,759 |
| 9 | 12500127 | 0,638 |
| 9 | 12500192 | 0,759 |
| 9 | 12500304 | 0,759 |
| 9 | 12500394 | 0,759 |
| 9 | 12500419 | 0,638 |
| 9 | 12500446 | 0,638 |
| 9 | 12500506 | 0,638 |
| 9 | 12500518 | 0,638 |
| 9 | 12500582 | 0,638 |
| 9 | 12500589 | 0,638 |
| 9 | 12501163 | 0,759 |
| 9 | 12501500 | 0,638 |
| 9 | 12501520 | 0,638 |
| 9 | 12501531 | 0,638 |

|   |          |       |
|---|----------|-------|
| 9 | 12501699 | 0,638 |
| 9 | 12501796 | 0,638 |
| 9 | 12501802 | 0,638 |
| 9 | 12501832 | 0,638 |
| 9 | 12502218 | 0,638 |
| 9 | 12502572 | 0,638 |
| 9 | 12502607 | 0,759 |
| 9 | 12503804 | 0,638 |
| 9 | 12503850 | 0,759 |
| 9 | 12504367 | 0,759 |
| 9 | 12504502 | 0,638 |
| 9 | 12505294 | 0,759 |
| 9 | 12505339 | 0,759 |
| 9 | 12505663 | 0,638 |
| 9 | 12505675 | 0,638 |
| 9 | 12505701 | 0,759 |
| 9 | 12505752 | 0,759 |
| 9 | 12505791 | 0,759 |
| 9 | 12505812 | 0,638 |
| 9 | 12505831 | 0,759 |
| 9 | 12505939 | 0,638 |
| 9 | 12506040 | 0,638 |
| 9 | 12506045 | 0,638 |
| 9 | 12506270 | 0,759 |
| 9 | 12506748 | 0,638 |
| 9 | 12506804 | 0,638 |
| 9 | 12506828 | 0,638 |
| 9 | 12506829 | 0,638 |
| 9 | 12506994 | 0,759 |
| 9 | 12507048 | 0,759 |
| 9 | 12507066 | 0,759 |
| 9 | 12507277 | 0,638 |
| 9 | 12507466 | 0,638 |
| 9 | 12507660 | 0,638 |
| 9 | 12507865 | 0,638 |
| 9 | 12507972 | 0,638 |
| 9 | 12507998 | 0,638 |
| 9 | 12507999 | 0,759 |
| 9 | 12509869 | 0,638 |
| 9 | 12510361 | 0,638 |
| 9 | 12512305 | 0,759 |
| 9 | 12513015 | 0,638 |
| 9 | 12513172 | 0,638 |
| 9 | 12513175 | 0,638 |
| 9 | 12513217 | 0,638 |
| 9 | 12513376 | 0,759 |
| 9 | 12513379 | 0,759 |
| 9 | 12513386 | 0,638 |

|   |          |       |
|---|----------|-------|
| 9 | 12513396 | 0,638 |
| 9 | 12513411 | 0,638 |
| 9 | 12513524 | 0,638 |
| 9 | 12513526 | 0,638 |
| 9 | 12513746 | 0,638 |
| 9 | 12513903 | 0,759 |
| 9 | 12513904 | 0,759 |
| 9 | 12514181 | 0,759 |
| 9 | 12514204 | 0,759 |
| 9 | 12514210 | 0,759 |
| 9 | 12514211 | 0,759 |
| 9 | 12514244 | 0,638 |
| 9 | 12514374 | 0,759 |
| 9 | 12514406 | 0,759 |
| 9 | 12514474 | 0,638 |
| 9 | 12514496 | 0,759 |
| 9 | 12514497 | 0,759 |
| 9 | 12514518 | 0,759 |
| 9 | 12514760 | 0,759 |
| 9 | 12514813 | 0,638 |
| 9 | 12515105 | 0,638 |
| 9 | 12515259 | 0,638 |
| 9 | 12515344 | 0,759 |
| 9 | 12516556 | 0,759 |
| 9 | 12516800 | 0,759 |
| 9 | 12516906 | 0,759 |
| 9 | 12517442 | 0,638 |
| 9 | 12517545 | 0,638 |
| 9 | 12517764 | 0,638 |
| 9 | 12517926 | 0,638 |
| 9 | 12518013 | 0,638 |
| 9 | 12518143 | 0,638 |
| 9 | 12518213 | 0,638 |
| 9 | 12518219 | 0,638 |
| 9 | 12518401 | 0,759 |
| 9 | 12518554 | 0,759 |
| 9 | 12519003 | 0,638 |
| 9 | 12519010 | 0,759 |
| 9 | 12519026 | 0,759 |
| 9 | 12519713 | 0,638 |
| 9 | 12519728 | 0,638 |
| 9 | 12519783 | 0,759 |
| 9 | 12519854 | 0,759 |
| 9 | 12519877 | 0,759 |
| 9 | 12519902 | 0,759 |
| 9 | 12519929 | 0,638 |
| 9 | 12520233 | 0,638 |
| 9 | 12521244 | 0,638 |

|   |          |       |
|---|----------|-------|
| 9 | 12521363 | 0,638 |
| 9 | 12521411 | 0,638 |
| 9 | 12521457 | 0,638 |
| 9 | 12522050 | 0,638 |
| 9 | 12522090 | 0,638 |
| 9 | 12522667 | 0,759 |
| 9 | 12522729 | 0,759 |
| 9 | 12522803 | 0,759 |
| 9 | 12522882 | 0,759 |
| 9 | 12522892 | 0,638 |
| 9 | 12523409 | 0,638 |
| 9 | 12523832 | 0,638 |
| 9 | 12523893 | 0,638 |
| 9 | 12524094 | 0,638 |
| 9 | 12524331 | 0,638 |
| 9 | 12524617 | 0,638 |
| 9 | 12525364 | 0,638 |
| 9 | 12525852 | 0,638 |
| 9 | 12525943 | 0,638 |
| 9 | 12526275 | 0,638 |
| 9 | 12526398 | 0,638 |
| 9 | 12526404 | 0,638 |
| 9 | 12526470 | 0,638 |
| 9 | 12526509 | 0,638 |
| 9 | 12526831 | 0,638 |
| 9 | 12527081 | 0,638 |
| 9 | 12527090 | 0,638 |
| 9 | 12527167 | 0,638 |
| 9 | 12527171 | 0,638 |
| 9 | 12527173 | 0,638 |
| 9 | 12527175 | 0,638 |
| 9 | 12527184 | 0,638 |
| 9 | 12527214 | 0,638 |
| 9 | 12527256 | 0,638 |
| 9 | 12527296 | 0,638 |
| 9 | 12527459 | 0,638 |
| 9 | 12527500 | 0,638 |
| 9 | 12527519 | 0,638 |
| 9 | 12527522 | 0,638 |
| 9 | 12527583 | 0,638 |
| 9 | 12527616 | 0,638 |
| 9 | 12527728 | 0,638 |
| 9 | 12527923 | 0,638 |
| 9 | 12528251 | 0,638 |
| 9 | 12528501 | 0,638 |
| 9 | 12528512 | 0,638 |
| 9 | 12528578 | 0,638 |
| 9 | 12528579 | 0,638 |



|   |          |       |
|---|----------|-------|
| 9 | 12528751 | 0,638 |
| 9 | 12528765 | 0,759 |
| 9 | 12528900 | 0,638 |
| 9 | 12529110 | 0,759 |
| 9 | 12529141 | 0,759 |
| 9 | 12529474 | 0,638 |
| 9 | 12529525 | 0,759 |
| 9 | 12529608 | 0,759 |
| 9 | 12529652 | 0,759 |
| 9 | 12529758 | 0,638 |
| 9 | 12529769 | 0,759 |
| 9 | 12529807 | 0,759 |
| 9 | 12529844 | 0,638 |
| 9 | 12529852 | 0,638 |
| 9 | 12530376 | 0,638 |
| 9 | 12530394 | 0,638 |
| 9 | 12530709 | 0,638 |
| 9 | 12530758 | 0,638 |
| 9 | 12530765 | 0,638 |
| 9 | 12530913 | 0,759 |
| 9 | 12531251 | 0,759 |
| 9 | 12531271 | 0,759 |
| 9 | 12531277 | 0,759 |
| 9 | 12531423 | 0,759 |
| 9 | 12531573 | 0,638 |
| 9 | 12531632 | 0,638 |
| 9 | 12531764 | 0,759 |
| 9 | 12532987 | 0,638 |
| 9 | 12533011 | 0,759 |
| 9 | 12533623 | 0,638 |
| 9 | 12533823 | 0,759 |
| 9 | 12534398 | 0,759 |
| 9 | 12534648 | 0,759 |
| 9 | 12534802 | 0,638 |
| 9 | 12535617 | 0,759 |
| 9 | 12535677 | 0,759 |
| 9 | 12535827 | 0,638 |
| 9 | 12536093 | 0,638 |
| 9 | 12536649 | 0,638 |
| 9 | 12536723 | 0,759 |
| 9 | 12536743 | 0,759 |
| 9 | 12536748 | 0,759 |
| 9 | 12536772 | 0,759 |
| 9 | 12536805 | 0,759 |
| 9 | 12536870 | 0,638 |
| 9 | 12536871 | 0,759 |
| 9 | 12536881 | 0,759 |
| 9 | 12536882 | 0,759 |

|   |          |       |
|---|----------|-------|
| 9 | 12536931 | 0,759 |
| 9 | 12537115 | 0,638 |
| 9 | 12537125 | 0,759 |
| 9 | 12537128 | 0,759 |
| 9 | 12537135 | 0,638 |
| 9 | 12537323 | 0,759 |
| 9 | 12537865 | 0,759 |
| 9 | 12537915 | 0,759 |
| 9 | 12538044 | 0,638 |
| 9 | 12538062 | 0,759 |
| 9 | 12538705 | 0,638 |
| 9 | 12538881 | 0,638 |
| 9 | 12538882 | 0,638 |
| 9 | 12539065 | 0,638 |
| 9 | 12539137 | 0,638 |
| 9 | 12539156 | 0,638 |
| 9 | 12539440 | 0,638 |
| 9 | 12539459 | 0,638 |
| 9 | 12539482 | 0,638 |
| 9 | 12539916 | 0,638 |
| 9 | 12540079 | 0,759 |
| 9 | 12540100 | 0,638 |
| 9 | 12540136 | 0,638 |
| 9 | 12540297 | 0,638 |
| 9 | 12540363 | 0,638 |
| 9 | 12540450 | 0,638 |
| 9 | 12540456 | 0,638 |
| 9 | 12540522 | 0,638 |
| 9 | 12540562 | 0,638 |
| 9 | 12540697 | 0,638 |
| 9 | 12540983 | 0,759 |
| 9 | 12540994 | 0,638 |
| 9 | 12541058 | 0,638 |
| 9 | 12541141 | 0,638 |
| 9 | 12541142 | 0,638 |
| 9 | 12541370 | 0,638 |
| 9 | 12541386 | 0,638 |
| 9 | 12541553 | 0,638 |
| 9 | 12541554 | 0,638 |
| 9 | 12541566 | 0,638 |
| 9 | 12541590 | 0,638 |
| 9 | 12541606 | 0,638 |
| 9 | 12541640 | 0,638 |
| 9 | 12542082 | 0,638 |
| 9 | 12542182 | 0,638 |
| 9 | 12542238 | 0,638 |
| 9 | 12542478 | 0,638 |
| 9 | 12542495 | 0,638 |

|   |          |       |
|---|----------|-------|
| 9 | 12542535 | 0,638 |
| 9 | 12542540 | 0,638 |
| 9 | 12542590 | 0,638 |
| 9 | 12542592 | 0,638 |
| 9 | 12543081 | 0,638 |
| 9 | 12543481 | 0,638 |
| 9 | 12543484 | 0,638 |
| 9 | 12543499 | 0,759 |
| 9 | 12543549 | 0,759 |
| 9 | 12543622 | 0,638 |
| 9 | 12543638 | 0,638 |
| 9 | 12543683 | 0,638 |
| 9 | 12543818 | 0,638 |
| 9 | 12543836 | 0,638 |
| 9 | 12543852 | 0,638 |
| 9 | 12543957 | 0,638 |
| 9 | 12544142 | 0,638 |
| 9 | 12544207 | 0,638 |
| 9 | 12544233 | 0,638 |
| 9 | 12544263 | 0,638 |
| 9 | 12544268 | 0,638 |
| 9 | 12544299 | 0,638 |
| 9 | 12544357 | 0,638 |
| 9 | 12544368 | 0,638 |
| 9 | 12544415 | 0,638 |
| 9 | 12544433 | 0,759 |
| 9 | 12544447 | 0,638 |
| 9 | 12544478 | 0,638 |
| 9 | 12544533 | 0,638 |
| 9 | 12544686 | 0,638 |
| 9 | 12544695 | 0,638 |
| 9 | 12544715 | 0,638 |
| 9 | 12544757 | 0,638 |
| 9 | 12544802 | 0,638 |
| 9 | 12544827 | 0,638 |
| 9 | 12544846 | 0,638 |
| 9 | 12545415 | 0,638 |
| 9 | 12545424 | 0,638 |
| 9 | 12545529 | 0,638 |
| 9 | 12545674 | 0,638 |
| 9 | 12545692 | 0,638 |
| 9 | 12545745 | 0,638 |
| 9 | 12545750 | 0,638 |
| 9 | 12545758 | 0,638 |
| 9 | 12545765 | 0,638 |
| 9 | 12545780 | 0,638 |
| 9 | 12545822 | 0,638 |
| 9 | 12545840 | 0,638 |

|   |          |       |
|---|----------|-------|
| 9 | 12545863 | 0,638 |
| 9 | 12546031 | 0,638 |
| 9 | 12547733 | 0,638 |
| 9 | 12548598 | 0,759 |
| 9 | 12549079 | 0,638 |
| 9 | 12549363 | 0,638 |
| 9 | 12549713 | 0,638 |
| 9 | 12549987 | 0,638 |
| 9 | 12550147 | 0,638 |
| 9 | 12550540 | 0,759 |
| 9 | 12550560 | 0,759 |
| 9 | 12550580 | 0,638 |
| 9 | 12550608 | 0,638 |
| 9 | 12550653 | 0,638 |
| 9 | 12550804 | 0,759 |
| 9 | 12551397 | 0,759 |
| 9 | 12551658 | 0,638 |
| 9 | 12551733 | 0,759 |
| 9 | 12551753 | 0,638 |
| 9 | 12551762 | 0,638 |
| 9 | 12552463 | 0,638 |
| 9 | 12552870 | 0,759 |
| 9 | 12552993 | 0,759 |
| 9 | 12553588 | 0,759 |
| 9 | 12553953 | 0,759 |
| 9 | 12554132 | 0,759 |
| 9 | 12554370 | 0,759 |
| 9 | 12554504 | 0,759 |
| 9 | 12554778 | 0,638 |
| 9 | 12555020 | 0,759 |
| 9 | 12555359 | 0,759 |
| 9 | 12555428 | 0,759 |
| 9 | 12555536 | 0,759 |
| 9 | 12555619 | 0,638 |
| 9 | 12555920 | 0,759 |
| 9 | 12556209 | 0,759 |
| 9 | 12556390 | 0,759 |
| 9 | 12556507 | 0,638 |
| 9 | 12556598 | 0,638 |
| 9 | 12556640 | 0,638 |
| 9 | 12556793 | 0,638 |
| 9 | 12556824 | 0,638 |
| 9 | 12556995 | 0,759 |
| 9 | 12557280 | 0,638 |
| 9 | 12557321 | 0,638 |
| 9 | 12557397 | 0,638 |
| 9 | 12557651 | 0,638 |
| 9 | 12557656 | 0,638 |

|   |          |       |
|---|----------|-------|
| 9 | 12557679 | 0,638 |
| 9 | 12557710 | 0,759 |
| 9 | 12557813 | 0,638 |
| 9 | 12557876 | 0,638 |
| 9 | 12557899 | 0,638 |
| 9 | 12557914 | 0,638 |
| 9 | 12557927 | 0,638 |
| 9 | 12558224 | 0,638 |
| 9 | 12558251 | 0,638 |
| 9 | 12558307 | 0,759 |
| 9 | 12558530 | 0,759 |
| 9 | 12558653 | 0,638 |
| 9 | 12558721 | 0,638 |
| 9 | 12558813 | 0,638 |
| 9 | 12558920 | 0,638 |
| 9 | 12558952 | 0,759 |
| 9 | 12559180 | 0,759 |
| 9 | 12559377 | 0,759 |
| 9 | 12559776 | 0,759 |
| 9 | 12559909 | 0,759 |
| 9 | 12560056 | 0,759 |
| 9 | 12560165 | 0,759 |
| 9 | 12560365 | 0,759 |
| 9 | 12560371 | 0,759 |
| 9 | 12560490 | 0,759 |
| 9 | 12560733 | 0,759 |
| 9 | 12561617 | 0,638 |
| 9 | 12561778 | 0,759 |
| 9 | 12561876 | 0,759 |
| 9 | 12561996 | 0,759 |
| 9 | 12562004 | 0,759 |
| 9 | 12562295 | 0,638 |
| 9 | 13351844 | 0,500 |
| 9 | 13368083 | 0,638 |
| 9 | 13392285 | 0,586 |
| 9 | 13392310 | 0,586 |
| 9 | 13392419 | 0,586 |
| 9 | 13392478 | 0,586 |
| 9 | 13392481 | 0,586 |
| 9 | 13392498 | 0,586 |
| 9 | 13392553 | 0,586 |
| 9 | 13392735 | 0,586 |
| 9 | 13392736 | 0,586 |
| 9 | 13392772 | 0,586 |
| 9 | 13392776 | 0,586 |
| 9 | 13393056 | 0,586 |
| 9 | 13393438 | 0,586 |
| 9 | 13393535 | 0,586 |

|   |          |       |
|---|----------|-------|
| 9 | 13393585 | 0,586 |
| 9 | 13394128 | 0,586 |
| 9 | 13402514 | 0,586 |
| 9 | 13406320 | 0,534 |
| 9 | 13406415 | 0,534 |
| 9 | 13406444 | 0,534 |
| 9 | 13406487 | 0,534 |
| 9 | 13406495 | 0,534 |
| 9 | 13406533 | 0,534 |
| 9 | 13406562 | 0,534 |
| 9 | 13406799 | 0,534 |
| 9 | 13406838 | 0,534 |
| 9 | 13406867 | 0,534 |
| 9 | 13406909 | 0,534 |
| 9 | 13406937 | 0,534 |
| 9 | 13407103 | 0,534 |
| 9 | 13407164 | 0,534 |
| 9 | 13407203 | 0,534 |
| 9 | 13407338 | 0,534 |
| 9 | 13407347 | 0,534 |
| 9 | 13407854 | 0,534 |
| 9 | 13407898 | 0,534 |
| 9 | 13408233 | 0,534 |
| 9 | 13408236 | 0,534 |
| 9 | 13408302 | 0,534 |
| 9 | 13408306 | 0,534 |
| 9 | 13408534 | 0,534 |
| 9 | 13408552 | 0,534 |
| 9 | 13408616 | 0,534 |
| 9 | 13408623 | 0,534 |
| 9 | 13409327 | 0,534 |
| 9 | 13409328 | 0,534 |
| 9 | 13409879 | 0,534 |
| 9 | 13409909 | 0,534 |
| 9 | 13410311 | 0,534 |
| 9 | 13410416 | 0,534 |
| 9 | 13410699 | 0,534 |
| 9 | 13411549 | 0,534 |
| 9 | 13411692 | 0,534 |
| 9 | 13412084 | 0,534 |
| 9 | 13437923 | 0,603 |
| 9 | 13437934 | 0,603 |
| 9 | 13438055 | 0,603 |
| 9 | 13438104 | 0,603 |
| 9 | 13438404 | 0,586 |
| 9 | 13439825 | 0,603 |
| 9 | 13439947 | 0,603 |
| 9 | 13439951 | 0,603 |

|   |          |       |
|---|----------|-------|
| 9 | 13440301 | 0,586 |
| 9 | 13440572 | 0,586 |
| 9 | 13441129 | 0,586 |
| 9 | 13441779 | 0,603 |
| 9 | 13441781 | 0,603 |
| 9 | 13442231 | 0,586 |
| 9 | 13442267 | 0,586 |
| 9 | 13442268 | 0,586 |
| 9 | 13442294 | 0,586 |
| 9 | 13443215 | 0,603 |
| 9 | 13443433 | 0,603 |
| 9 | 13443764 | 0,603 |
| 9 | 13444193 | 0,586 |
| 9 | 13444268 | 0,586 |
| 9 | 13444327 | 0,586 |
| 9 | 13444372 | 0,586 |
| 9 | 13444376 | 0,586 |
| 9 | 13446800 | 0,603 |
| 9 | 13446957 | 0,586 |
| 9 | 13447675 | 0,603 |
| 9 | 13448590 | 0,655 |
| 9 | 13448835 | 0,603 |
| 9 | 13448870 | 0,655 |
| 9 | 13448947 | 0,655 |
| 9 | 13448952 | 0,655 |
| 9 | 13449998 | 0,638 |
| 9 | 13450065 | 0,586 |
| 9 | 13451109 | 0,638 |
| 9 | 13451308 | 0,638 |
| 9 | 13452655 | 0,638 |
| 9 | 13452685 | 0,638 |
| 9 | 13458330 | 0,586 |
| 9 | 13458666 | 0,586 |
| 9 | 13458702 | 0,586 |
| 9 | 13459146 | 0,586 |
| 9 | 13459324 | 0,638 |
| 9 | 13459470 | 0,586 |
| 9 | 13459660 | 0,638 |
| 9 | 13459670 | 0,586 |
| 9 | 13459719 | 0,586 |
| 9 | 13474805 | 0,586 |
| 9 | 13475188 | 0,655 |
| 9 | 13475400 | 0,586 |
| 9 | 13478949 | 0,655 |
| 9 | 13479000 | 0,655 |
| 9 | 13479275 | 0,603 |
| 9 | 13479987 | 0,655 |
| 9 | 13480122 | 0,655 |

|   |          |       |
|---|----------|-------|
| 9 | 13480155 | 0,655 |
| 9 | 13480255 | 0,655 |
| 9 | 13481196 | 0,586 |
| 9 | 13481197 | 0,586 |
| 9 | 13481227 | 0,638 |
| 9 | 13481471 | 0,655 |
| 9 | 13481493 | 0,603 |
| 9 | 13482485 | 0,655 |
| 9 | 13482492 | 0,655 |
| 9 | 13482560 | 0,638 |
| 9 | 13482598 | 0,638 |
| 9 | 13482603 | 0,638 |
| 9 | 13482658 | 0,638 |
| 9 | 13482660 | 0,638 |
| 9 | 13482665 | 0,638 |
| 9 | 13482670 | 0,638 |
| 9 | 13482692 | 0,638 |
| 9 | 13482819 | 0,655 |
| 9 | 13483776 | 0,586 |
| 9 | 13483781 | 0,638 |
| 9 | 13483829 | 0,655 |
| 9 | 13483835 | 0,603 |
| 9 | 13484064 | 0,638 |
| 9 | 13484744 | 0,655 |
| 9 | 13485162 | 0,603 |
| 9 | 13485871 | 0,586 |
| 9 | 13486000 | 0,655 |
| 9 | 13486007 | 0,603 |
| 9 | 13486008 | 0,603 |
| 9 | 13486022 | 0,655 |
| 9 | 13486167 | 0,638 |
| 9 | 13486185 | 0,638 |
| 9 | 13486416 | 0,638 |
| 9 | 13486509 | 0,638 |
| 9 | 13486551 | 0,655 |
| 9 | 13486560 | 0,655 |
| 9 | 13486658 | 0,655 |
| 9 | 13486667 | 0,655 |
| 9 | 13486760 | 0,655 |
| 9 | 13487196 | 0,655 |
| 9 | 13487926 | 0,638 |
| 9 | 13487983 | 0,638 |
| 9 | 13489907 | 0,586 |
| 9 | 13489942 | 0,638 |
| 9 | 13490033 | 0,603 |
| 9 | 13490379 | 0,638 |
| 9 | 13490653 | 0,655 |
| 9 | 13490768 | 0,603 |



|   |          |       |
|---|----------|-------|
| 9 | 13490966 | 0,603 |
| 9 | 13490968 | 0,603 |
| 9 | 13491260 | 0,603 |
| 9 | 13491465 | 0,586 |
| 9 | 13492016 | 0,603 |
| 9 | 13492116 | 0,586 |
| 9 | 13492145 | 0,586 |
| 9 | 13492688 | 0,586 |
| 9 | 13493798 | 0,603 |
| 9 | 13494109 | 0,603 |
| 9 | 13494469 | 0,603 |
| 9 | 13494516 | 0,603 |
| 9 | 13494592 | 0,586 |
| 9 | 13495018 | 0,586 |
| 9 | 13495025 | 0,586 |
| 9 | 13495074 | 0,586 |
| 9 | 13495177 | 0,603 |
| 9 | 13495192 | 0,603 |
| 9 | 13495287 | 0,603 |
| 9 | 13495289 | 0,603 |
| 9 | 13495305 | 0,603 |
| 9 | 13495310 | 0,603 |
| 9 | 13495357 | 0,603 |
| 9 | 13495358 | 0,603 |
| 9 | 13495361 | 0,603 |
| 9 | 13495566 | 0,603 |
| 9 | 13495579 | 0,603 |
| 9 | 13495585 | 0,603 |
| 9 | 13495622 | 0,603 |
| 9 | 13495879 | 0,586 |
| 9 | 13496568 | 0,586 |
| 9 | 13496600 | 0,586 |
| 9 | 13496601 | 0,586 |
| 9 | 13496689 | 0,586 |
| 9 | 13497360 | 0,603 |
| 9 | 13498698 | 0,586 |
| 9 | 13499321 | 0,603 |
| 9 | 13499410 | 0,603 |
| 9 | 13499443 | 0,586 |
| 9 | 13499494 | 0,603 |
| 9 | 13499863 | 0,586 |
| 9 | 13500930 | 0,586 |
| 9 | 13501309 | 0,586 |
| 9 | 13501937 | 0,603 |
| 9 | 13501948 | 0,603 |
| 9 | 13502007 | 0,603 |
| 9 | 13502027 | 0,603 |
| 9 | 13502493 | 0,603 |

|   |          |       |
|---|----------|-------|
| 9 | 13502510 | 0,655 |
| 9 | 13502614 | 0,603 |
| 9 | 13503867 | 0,603 |
| 9 | 13504955 | 0,586 |
| 9 | 13505069 | 0,586 |
| 9 | 13505126 | 0,586 |
| 9 | 13505319 | 0,586 |
| 9 | 13505320 | 0,586 |
| 9 | 13505406 | 0,603 |
| 9 | 13506405 | 0,603 |
| 9 | 13508293 | 0,603 |
| 9 | 13508297 | 0,603 |
| 9 | 13509393 | 0,586 |
| 9 | 13509993 | 0,586 |
| 9 | 13510073 | 0,586 |
| 9 | 13510637 | 0,586 |
| 9 | 13511269 | 0,586 |
| 9 | 13511282 | 0,586 |
| 9 | 13513314 | 0,586 |
| 9 | 13513445 | 0,586 |
| 9 | 13514277 | 0,586 |
| 9 | 13514692 | 0,586 |
| 9 | 13514941 | 0,586 |
| 9 | 13515107 | 0,603 |
| 9 | 13515129 | 0,655 |
| 9 | 13515134 | 0,603 |
| 9 | 13515162 | 0,603 |
| 9 | 13515179 | 0,603 |
| 9 | 13515183 | 0,603 |
| 9 | 13515390 | 0,603 |
| 9 | 13515426 | 0,655 |
| 9 | 13517955 | 0,586 |
| 9 | 13518186 | 0,586 |
| 9 | 13518619 | 0,603 |
| 9 | 13519231 | 0,603 |
| 9 | 13519465 | 0,586 |
| 9 | 13519514 | 0,586 |
| 9 | 13519552 | 0,586 |
| 9 | 13519560 | 0,586 |
| 9 | 13519583 | 0,586 |
| 9 | 13519647 | 0,586 |
| 9 | 13519653 | 0,586 |
| 9 | 13519732 | 0,586 |
| 9 | 13519826 | 0,586 |
| 9 | 13519834 | 0,586 |
| 9 | 13519841 | 0,586 |
| 9 | 13519893 | 0,603 |
| 9 | 13520422 | 0,586 |

|   |          |       |
|---|----------|-------|
| 9 | 13520800 | 0,603 |
| 9 | 13522950 | 0,603 |
| 9 | 13523382 | 0,586 |
| 9 | 13528314 | 0,603 |
| 9 | 13529186 | 0,586 |
| 9 | 13533376 | 0,603 |
| 9 | 13534806 | 0,586 |
| 9 | 13534830 | 0,586 |
| 9 | 13534846 | 0,586 |
| 9 | 13534858 | 0,586 |
| 9 | 13534876 | 0,586 |
| 9 | 13535170 | 0,603 |
| 9 | 13535198 | 0,603 |
| 9 | 13535327 | 0,603 |
| 9 | 13535473 | 0,586 |
| 9 | 13535485 | 0,586 |
| 9 | 13535575 | 0,603 |
| 9 | 13536044 | 0,586 |
| 9 | 13536617 | 0,603 |
| 9 | 13537131 | 0,603 |
| 9 | 13537615 | 0,586 |
| 9 | 13537634 | 0,586 |
| 9 | 13537815 | 0,586 |
| 9 | 13539549 | 0,603 |
| 9 | 13540180 | 0,586 |
| 9 | 13541012 | 0,603 |
| 9 | 13541306 | 0,586 |
| 9 | 13541464 | 0,603 |
| 9 | 13541800 | 0,603 |
| 9 | 13541868 | 0,603 |
| 9 | 13542010 | 0,586 |
| 9 | 13542545 | 0,586 |
| 9 | 13542676 | 0,586 |
| 9 | 13543207 | 0,586 |
| 9 | 13544697 | 0,586 |
| 9 | 13544780 | 0,586 |
| 9 | 13544925 | 0,586 |
| 9 | 13545133 | 0,603 |
| 9 | 13545216 | 0,586 |
| 9 | 13546012 | 0,603 |
| 9 | 13546094 | 0,603 |
| 9 | 13546098 | 0,603 |
| 9 | 13546581 | 0,586 |
| 9 | 13546599 | 0,586 |
| 9 | 13546956 | 0,603 |
| 9 | 13546957 | 0,603 |
| 9 | 13547203 | 0,586 |
| 9 | 13547387 | 0,586 |

|   |          |       |
|---|----------|-------|
| 9 | 13547583 | 0,586 |
| 9 | 13547594 | 0,586 |
| 9 | 13547626 | 0,586 |
| 9 | 13547630 | 0,586 |
| 9 | 13547833 | 0,603 |
| 9 | 13548177 | 0,603 |
| 9 | 13548852 | 0,603 |
| 9 | 13548853 | 0,603 |
| 9 | 13549137 | 0,603 |
| 9 | 13549700 | 0,586 |
| 9 | 13549714 | 0,586 |
| 9 | 13550274 | 0,586 |
| 9 | 13551081 | 0,603 |
| 9 | 13552193 | 0,655 |
| 9 | 13552232 | 0,655 |
| 9 | 13552234 | 0,655 |
| 9 | 13552235 | 0,655 |
| 9 | 13552255 | 0,655 |
| 9 | 13552468 | 0,586 |
| 9 | 13552545 | 0,638 |
| 9 | 13553205 | 0,655 |
| 9 | 13553211 | 0,655 |
| 9 | 13553229 | 0,655 |
| 9 | 13553287 | 0,655 |
| 9 | 13553296 | 0,655 |
| 9 | 13553314 | 0,655 |
| 9 | 13553586 | 0,655 |
| 9 | 13553598 | 0,603 |
| 9 | 13553611 | 0,603 |
| 9 | 13553622 | 0,603 |
| 9 | 13553664 | 0,603 |
| 9 | 13553681 | 0,655 |
| 9 | 13553852 | 0,603 |
| 9 | 13554027 | 0,655 |
| 9 | 13554036 | 0,603 |
| 9 | 13554185 | 0,586 |
| 9 | 13554238 | 0,638 |
| 9 | 13554240 | 0,638 |
| 9 | 13554248 | 0,586 |
| 9 | 13554251 | 0,586 |
| 9 | 13554374 | 0,638 |
| 9 | 13554475 | 0,586 |
| 9 | 13554829 | 0,638 |
| 9 | 13555331 | 0,586 |
| 9 | 13555340 | 0,638 |
| 9 | 13555550 | 0,655 |
| 9 | 13555688 | 0,586 |
| 9 | 13556082 | 0,655 |

|   |          |       |
|---|----------|-------|
| 9 | 13556105 | 0,655 |
| 9 | 13556255 | 0,638 |
| 9 | 13556372 | 0,655 |
| 9 | 13556688 | 0,638 |
| 9 | 13557396 | 0,638 |
| 9 | 13559295 | 0,603 |
| 9 | 13559298 | 0,603 |
| 9 | 13559414 | 0,603 |
| 9 | 13559524 | 0,603 |
| 9 | 13559586 | 0,603 |
| 9 | 13559952 | 0,603 |
| 9 | 13560108 | 0,638 |
| 9 | 13560474 | 0,655 |
| 9 | 13560520 | 0,603 |
| 9 | 13560536 | 0,603 |
| 9 | 13560761 | 0,603 |
| 9 | 13560775 | 0,603 |
| 9 | 13560799 | 0,655 |
| 9 | 13561078 | 0,655 |
| 9 | 13561090 | 0,655 |
| 9 | 13561213 | 0,655 |
| 9 | 13561304 | 0,603 |
| 9 | 13561390 | 0,603 |
| 9 | 13562360 | 0,603 |
| 9 | 13562735 | 0,655 |
| 9 | 13562777 | 0,655 |
| 9 | 13565072 | 0,638 |
| 9 | 13565366 | 0,655 |
| 9 | 13565372 | 0,655 |
| 9 | 13565460 | 0,603 |
| 9 | 13566090 | 0,655 |
| 9 | 13566508 | 0,638 |
| 9 | 13567017 | 0,638 |
| 9 | 13567552 | 0,586 |
| 9 | 13567581 | 0,586 |
| 9 | 13567594 | 0,638 |
| 9 | 13569111 | 0,586 |
| 9 | 13569123 | 0,586 |
| 9 | 13569216 | 0,655 |
| 9 | 13569217 | 0,655 |
| 9 | 13571496 | 0,638 |
| 9 | 13571639 | 0,638 |
| 9 | 13572224 | 0,603 |
| 9 | 13572254 | 0,603 |
| 9 | 13572258 | 0,603 |
| 9 | 13572287 | 0,603 |
| 9 | 13572301 | 0,603 |
| 9 | 13573203 | 0,586 |

|   |          |       |
|---|----------|-------|
| 9 | 13573253 | 0,586 |
| 9 | 13573254 | 0,638 |
| 9 | 13573776 | 0,638 |
| 9 | 13574401 | 0,655 |
| 9 | 13574460 | 0,655 |
| 9 | 13574651 | 0,586 |
| 9 | 13575437 | 0,655 |
| 9 | 13575521 | 0,655 |
| 9 | 13575535 | 0,655 |
| 9 | 13575537 | 0,655 |
| 9 | 13575541 | 0,655 |
| 9 | 13575554 | 0,655 |
| 9 | 13575583 | 0,655 |
| 9 | 13575786 | 0,655 |
| 9 | 13575968 | 0,655 |
| 9 | 13575970 | 0,655 |
| 9 | 13575998 | 0,655 |
| 9 | 13576012 | 0,655 |
| 9 | 13576106 | 0,638 |
| 9 | 13576191 | 0,655 |
| 9 | 13576986 | 0,638 |
| 9 | 13577054 | 0,586 |
| 9 | 13577107 | 0,638 |
| 9 | 13577153 | 0,638 |
| 9 | 13577218 | 0,638 |
| 9 | 13577235 | 0,586 |
| 9 | 13580015 | 0,638 |
| 9 | 13580048 | 0,638 |
| 9 | 13580146 | 0,638 |
| 9 | 13580420 | 0,638 |
| 9 | 13580762 | 0,655 |
| 9 | 13580847 | 0,655 |
| 9 | 13581106 | 0,638 |
| 9 | 13581178 | 0,655 |
| 9 | 13581197 | 0,655 |
| 9 | 13581917 | 0,638 |
| 9 | 13584193 | 0,603 |
| 9 | 13584308 | 0,603 |
| 9 | 13584738 | 0,638 |
| 9 | 13584810 | 0,638 |
| 9 | 13585372 | 0,603 |
| 9 | 13585443 | 0,603 |
| 9 | 13586150 | 0,603 |
| 9 | 13586153 | 0,655 |
| 9 | 13586367 | 0,603 |
| 9 | 13586475 | 0,655 |
| 9 | 13586885 | 0,655 |
| 9 | 13586909 | 0,655 |

|   |          |       |
|---|----------|-------|
| 9 | 13586912 | 0,655 |
| 9 | 13586914 | 0,655 |
| 9 | 13587082 | 0,638 |
| 9 | 13587121 | 0,655 |
| 9 | 13587126 | 0,655 |
| 9 | 13587314 | 0,603 |
| 9 | 13588215 | 0,638 |
| 9 | 13588232 | 0,586 |
| 9 | 13588498 | 0,603 |
| 9 | 13588911 | 0,603 |
| 9 | 13589011 | 0,603 |
| 9 | 13589117 | 0,655 |
| 9 | 13589583 | 0,603 |
| 9 | 13589692 | 0,603 |
| 9 | 13590625 | 0,638 |
| 9 | 13590701 | 0,638 |
| 9 | 13590723 | 0,586 |
| 9 | 13590863 | 0,586 |
| 9 | 13590967 | 0,603 |
| 9 | 13590976 | 0,655 |
| 9 | 13591019 | 0,655 |
| 9 | 13591121 | 0,638 |
| 9 | 13591995 | 0,638 |
| 9 | 13592247 | 0,603 |
| 9 | 13593290 | 0,603 |
| 9 | 13593303 | 0,603 |
| 9 | 13593322 | 0,603 |
| 9 | 13593323 | 0,603 |
| 9 | 13593506 | 0,603 |
| 9 | 13593513 | 0,655 |
| 9 | 13593517 | 0,603 |
| 9 | 13593638 | 0,638 |
| 9 | 13603006 | 0,655 |
| 9 | 13605412 | 0,655 |
| 9 | 13605670 | 0,603 |
| 9 | 13605676 | 0,603 |
| 9 | 13605703 | 0,603 |
| 9 | 13605810 | 0,603 |
| 9 | 13605838 | 0,603 |
| 9 | 13605857 | 0,603 |
| 9 | 13605872 | 0,603 |
| 9 | 13607034 | 0,603 |
| 9 | 13607221 | 0,603 |
| 9 | 13607224 | 0,603 |
| 9 | 13607370 | 0,586 |
| 9 | 13607416 | 0,586 |
| 9 | 13608090 | 0,603 |
| 9 | 13608367 | 0,603 |

|   |          |       |
|---|----------|-------|
| 9 | 13608405 | 0,603 |
| 9 | 13608793 | 0,603 |
| 9 | 13609006 | 0,603 |
| 9 | 13609023 | 0,603 |
| 9 | 13609158 | 0,603 |
| 9 | 13609167 | 0,603 |
| 9 | 13609453 | 0,603 |
| 9 | 13609457 | 0,603 |
| 9 | 13609553 | 0,586 |
| 9 | 13609790 | 0,638 |
| 9 | 13609861 | 0,638 |
| 9 | 13609941 | 0,603 |
| 9 | 13610073 | 0,586 |
| 9 | 13610223 | 0,586 |
| 9 | 13610639 | 0,586 |
| 9 | 13610735 | 0,638 |
| 9 | 13610946 | 0,638 |
| 9 | 13611440 | 0,638 |
| 9 | 13611536 | 0,638 |
| 9 | 13611656 | 0,638 |
| 9 | 13611919 | 0,655 |
| 9 | 13611978 | 0,603 |
| 9 | 13612005 | 0,655 |
| 9 | 13612046 | 0,638 |
| 9 | 13612345 | 0,655 |
| 9 | 13613433 | 0,586 |
| 9 | 13613814 | 0,603 |
| 9 | 13614420 | 0,655 |
| 9 | 13615121 | 0,638 |
| 9 | 13616166 | 0,603 |
| 9 | 13616641 | 0,638 |
| 9 | 13616749 | 0,655 |
| 9 | 13616752 | 0,655 |
| 9 | 13616778 | 0,603 |
| 9 | 13617829 | 0,603 |
| 9 | 13617849 | 0,603 |
| 9 | 13617983 | 0,655 |
| 9 | 13618014 | 0,603 |
| 9 | 13618130 | 0,638 |
| 9 | 13618442 | 0,603 |
| 9 | 13618458 | 0,655 |
| 9 | 13618526 | 0,603 |
| 9 | 13618553 | 0,603 |
| 9 | 13618558 | 0,603 |
| 9 | 13618574 | 0,603 |
| 9 | 13618627 | 0,603 |
| 9 | 13618648 | 0,603 |
| 9 | 13618669 | 0,603 |



|   |          |       |
|---|----------|-------|
| 9 | 13618832 | 0,603 |
| 9 | 13619320 | 0,603 |
| 9 | 13619391 | 0,655 |
| 9 | 13619392 | 0,655 |
| 9 | 13619397 | 0,655 |
| 9 | 13620477 | 0,655 |
| 9 | 13621491 | 0,638 |
| 9 | 13621610 | 0,586 |
| 9 | 13622643 | 0,603 |
| 9 | 13623055 | 0,655 |
| 9 | 13623060 | 0,603 |
| 9 | 13623195 | 0,603 |
| 9 | 13623202 | 0,655 |
| 9 | 13623216 | 0,655 |
| 9 | 13623225 | 0,603 |
| 9 | 13623315 | 0,586 |
| 9 | 13623360 | 0,586 |
| 9 | 13623913 | 0,603 |
| 9 | 13623946 | 0,603 |
| 9 | 13623947 | 0,603 |
| 9 | 13624694 | 0,586 |
| 9 | 13624785 | 0,586 |
| 9 | 13624885 | 0,638 |
| 9 | 13624925 | 0,586 |
| 9 | 13625024 | 0,586 |
| 9 | 13625059 | 0,586 |
| 9 | 13625062 | 0,586 |
| 9 | 13625793 | 0,603 |
| 9 | 13626629 | 0,655 |
| 9 | 13626632 | 0,603 |
| 9 | 13627020 | 0,655 |
| 9 | 13627029 | 0,655 |
| 9 | 13627057 | 0,655 |
| 9 | 13627194 | 0,638 |
| 9 | 13627198 | 0,638 |
| 9 | 13627549 | 0,655 |
| 9 | 13627772 | 0,638 |
| 9 | 13627873 | 0,638 |
| 9 | 13628197 | 0,586 |
| 9 | 13628339 | 0,655 |
| 9 | 13628341 | 0,655 |
| 9 | 13628397 | 0,655 |
| 9 | 13628496 | 0,655 |
| 9 | 13629195 | 0,586 |
| 9 | 13629902 | 0,655 |
| 9 | 13630096 | 0,655 |
| 9 | 13630353 | 0,638 |
| 9 | 13630441 | 0,638 |

|   |          |       |
|---|----------|-------|
| 9 | 13630504 | 0,638 |
| 9 | 13630523 | 0,638 |
| 9 | 13630830 | 0,603 |
| 9 | 13631016 | 0,603 |
| 9 | 13631019 | 0,603 |
| 9 | 13631063 | 0,603 |
| 9 | 13631075 | 0,603 |
| 9 | 13631094 | 0,603 |
| 9 | 13631344 | 0,603 |
| 9 | 13631357 | 0,603 |
| 9 | 13631555 | 0,603 |
| 9 | 13631825 | 0,638 |
| 9 | 13631833 | 0,638 |
| 9 | 13632041 | 0,638 |
| 9 | 13632155 | 0,638 |
| 9 | 13632322 | 0,655 |
| 9 | 13633527 | 0,603 |
| 9 | 13633545 | 0,655 |
| 9 | 13633567 | 0,655 |
| 9 | 13633583 | 0,655 |
| 9 | 13633613 | 0,603 |
| 9 | 13633614 | 0,655 |
| 9 | 13634022 | 0,586 |
| 9 | 13634037 | 0,638 |
| 9 | 13634165 | 0,603 |
| 9 | 13634581 | 0,603 |
| 9 | 13634678 | 0,586 |
| 9 | 13635214 | 0,638 |
| 9 | 13635518 | 0,655 |
| 9 | 13635696 | 0,655 |
| 9 | 13635701 | 0,655 |
| 9 | 13635871 | 0,655 |
| 9 | 13635875 | 0,655 |
| 9 | 13636289 | 0,655 |
| 9 | 13636290 | 0,655 |
| 9 | 13636319 | 0,655 |
| 9 | 13636322 | 0,655 |
| 9 | 13637301 | 0,586 |
| 9 | 13638432 | 0,655 |
| 9 | 13639783 | 0,603 |
| 9 | 13639784 | 0,603 |
| 9 | 13639991 | 0,638 |
| 9 | 13640142 | 0,638 |
| 9 | 13641145 | 0,603 |
| 9 | 13641596 | 0,655 |
| 9 | 13641739 | 0,655 |
| 9 | 13642153 | 0,603 |
| 9 | 13642690 | 0,638 |

|   |          |       |
|---|----------|-------|
| 9 | 13642698 | 0,586 |
| 9 | 13642708 | 0,586 |
| 9 | 13642740 | 0,638 |
| 9 | 13642908 | 0,638 |
| 9 | 13643279 | 0,638 |
| 9 | 13643644 | 0,586 |
| 9 | 13643836 | 0,655 |
| 9 | 13643841 | 0,655 |
| 9 | 13643847 | 0,655 |
| 9 | 13644058 | 0,655 |
| 9 | 13644068 | 0,655 |
| 9 | 13644571 | 0,655 |
| 9 | 13644588 | 0,603 |
| 9 | 13644732 | 0,655 |
| 9 | 13644734 | 0,655 |
| 9 | 13644744 | 0,655 |
| 9 | 13644859 | 0,603 |
| 9 | 13644981 | 0,603 |
| 9 | 13645031 | 0,603 |
| 9 | 13645244 | 0,655 |
| 9 | 13645337 | 0,655 |
| 9 | 13645346 | 0,655 |
| 9 | 13645397 | 0,638 |
| 9 | 13645439 | 0,638 |
| 9 | 13645465 | 0,638 |
| 9 | 13645469 | 0,638 |
| 9 | 13645472 | 0,638 |
| 9 | 13645488 | 0,638 |
| 9 | 13645588 | 0,655 |
| 9 | 13645655 | 0,655 |
| 9 | 13645889 | 0,655 |
| 9 | 13646060 | 0,603 |
| 9 | 13647021 | 0,603 |
| 9 | 13647323 | 0,638 |
| 9 | 13647425 | 0,603 |
| 9 | 13647439 | 0,603 |
| 9 | 13647485 | 0,586 |
| 9 | 13647494 | 0,586 |
| 9 | 13647513 | 0,586 |
| 9 | 13647610 | 0,638 |
| 9 | 13647677 | 0,638 |
| 9 | 13652453 | 0,603 |
| 9 | 13653710 | 0,586 |
| 9 | 13653810 | 0,603 |
| 9 | 13653861 | 0,586 |
| 9 | 13653953 | 0,638 |
| 9 | 13653968 | 0,586 |
| 9 | 13653982 | 0,586 |

|   |          |       |
|---|----------|-------|
| 9 | 13654006 | 0,638 |
| 9 | 13655655 | 0,638 |
| 9 | 13655671 | 0,586 |
| 9 | 13657550 | 0,638 |
| 9 | 13657726 | 0,638 |
| 9 | 13657892 | 0,638 |
| 9 | 13658461 | 0,638 |
| 9 | 13658614 | 0,603 |
| 9 | 13658686 | 0,603 |
| 9 | 13658867 | 0,655 |
| 9 | 13659845 | 0,638 |
| 9 | 13660678 | 0,603 |
| 9 | 13660786 | 0,603 |
| 9 | 13660798 | 0,603 |
| 9 | 13660819 | 0,603 |
| 9 | 13661476 | 0,638 |
| 9 | 13661528 | 0,638 |
| 9 | 13662279 | 0,638 |
| 9 | 13662304 | 0,638 |
| 9 | 13662331 | 0,638 |

---

**Table S10.** SNPs with allele-frequency difference > 0.5 in purging region in HW lineage on chromosome 11 (10.6-11.2 Mb). Loci highlighted in green were tag SNPs selected by backward-elimination analysis in this region.

| Chromosome | Position | AFD   |
|------------|----------|-------|
| 11         | 10752282 | 0,737 |
| 11         | 10767949 | 0,530 |
| 11         | 10780721 | 0,513 |
| 11         | 10780976 | 0,530 |
| 11         | 10780979 | 0,530 |
| 11         | 10782457 | 0,530 |
| 11         | 10782653 | 0,530 |
| 11         | 10782717 | 0,530 |
| 11         | 10782724 | 0,530 |
| 11         | 10783477 | 0,530 |
| 11         | 10784048 | 0,530 |
| 11         | 10785259 | 0,530 |
| 11         | 10785337 | 0,737 |
| 11         | 10785620 | 0,737 |
| 11         | 10785717 | 0,530 |
| 11         | 10786854 | 0,530 |
| 11         | 10786955 | 0,530 |
| 11         | 10786956 | 0,530 |
| 11         | 10786960 | 0,530 |
| 11         | 10787303 | 0,530 |
| 11         | 10787304 | 0,530 |
| 11         | 10787405 | 0,530 |
| 11         | 10787622 | 0,530 |
| 11         | 10787630 | 0,530 |
| 11         | 10787705 | 0,530 |
| 11         | 10787706 | 0,530 |
| 11         | 10787731 | 0,530 |
| 11         | 10787816 | 0,530 |
| 11         | 10787959 | 0,530 |
| 11         | 10788547 | 0,737 |
| 11         | 10788979 | 0,737 |
| 11         | 10789047 | 0,513 |
| 11         | 10789411 | 0,513 |
| 11         | 10789596 | 0,513 |
| 11         | 10789631 | 0,737 |
| 11         | 10789718 | 0,513 |
| 11         | 10790223 | 0,737 |
| 11         | 10790246 | 0,513 |
| 11         | 10790773 | 0,737 |
| 11         | 10790839 | 0,737 |
| 11         | 10790845 | 0,737 |
| 11         | 10790908 | 0,737 |

|    |          |       |
|----|----------|-------|
| 11 | 10791012 | 0,737 |
| 11 | 10791536 | 0,737 |
| 11 | 10791540 | 0,737 |
| 11 | 10792033 | 0,513 |
| 11 | 10792275 | 0,737 |
| 11 | 10792355 | 0,737 |
| 11 | 10792625 | 0,513 |
| 11 | 10792797 | 0,737 |
| 11 | 10794106 | 0,530 |
| 11 | 10796935 | 0,530 |
| 11 | 10796942 | 0,530 |
| 11 | 10796964 | 0,530 |
| 11 | 10797435 | 0,513 |
| 11 | 10797451 | 0,513 |
| 11 | 10797577 | 0,530 |
| 11 | 10797604 | 0,530 |
| 11 | 10799070 | 0,530 |
| 11 | 10799482 | 0,513 |
| 11 | 10800190 | 0,530 |
| 11 | 10801113 | 0,530 |
| 11 | 10801325 | 0,513 |
| 11 | 10801350 | 0,513 |
| 11 | 10801354 | 0,513 |
| 11 | 10801422 | 0,513 |
| 11 | 10801543 | 0,513 |
| 11 | 10801858 | 0,530 |
| 11 | 10801907 | 0,530 |
| 11 | 10801940 | 0,530 |
| 11 | 10802624 | 0,737 |
| 11 | 10803377 | 0,737 |
| 11 | 10803771 | 0,737 |
| 11 | 10803841 | 0,737 |
| 11 | 10803945 | 0,737 |
| 11 | 10803948 | 0,737 |
| 11 | 10803979 | 0,737 |
| 11 | 10803988 | 0,737 |
| 11 | 10804010 | 0,737 |
| 11 | 10804444 | 0,513 |
| 11 | 10805329 | 0,530 |
| 11 | 10806327 | 0,513 |
| 11 | 10807490 | 0,530 |
| 11 | 10807676 | 0,530 |
| 11 | 10807952 | 0,737 |
| 11 | 10807956 | 0,737 |
| 11 | 10807957 | 0,737 |
| 11 | 10807969 | 0,737 |
| 11 | 10808164 | 0,737 |
| 11 | 10808986 | 0,513 |

|    |          |       |
|----|----------|-------|
| 11 | 10809978 | 0,737 |
| 11 | 10810516 | 0,737 |
| 11 | 10810535 | 0,737 |
| 11 | 10810540 | 0,530 |
| 11 | 10810557 | 0,737 |
| 11 | 10810637 | 0,737 |
| 11 | 10810842 | 0,737 |
| 11 | 10810886 | 0,737 |
| 11 | 10810941 | 0,737 |
| 11 | 10811033 | 0,737 |
| 11 | 10811656 | 0,530 |
| 11 | 10811676 | 0,530 |
| 11 | 10812647 | 0,530 |
| 11 | 10812721 | 0,737 |
| 11 | 10812922 | 0,737 |
| 11 | 10812977 | 0,737 |
| 11 | 10813029 | 0,727 |
| 11 | 10813202 | 0,530 |
| 11 | 10813207 | 0,737 |
| 11 | 10813678 | 0,530 |
| 11 | 10814865 | 0,737 |
| 11 | 10815088 | 0,737 |
| 11 | 10815204 | 0,530 |
| 11 | 10815309 | 0,737 |
| 11 | 10815346 | 0,737 |
| 11 | 10815350 | 0,737 |
| 11 | 10815677 | 0,513 |
| 11 | 10815750 | 0,513 |
| 11 | 10815860 | 0,737 |
| 11 | 10816661 | 0,530 |
| 11 | 10816695 | 0,530 |
| 11 | 10816782 | 0,513 |
| 11 | 10816804 | 0,513 |
| 11 | 10816934 | 0,530 |
| 11 | 10817040 | 0,530 |
| 11 | 10817055 | 0,737 |
| 11 | 10817223 | 0,530 |
| 11 | 10817238 | 0,530 |
| 11 | 10817733 | 0,513 |
| 11 | 10817804 | 0,513 |
| 11 | 10817840 | 0,513 |
| 11 | 10817898 | 0,513 |
| 11 | 10817947 | 0,513 |
| 11 | 10821146 | 0,737 |
| 11 | 10821411 | 0,727 |
| 11 | 10821437 | 0,727 |
| 11 | 10821440 | 0,727 |
| 11 | 10821932 | 0,737 |

|    |          |       |
|----|----------|-------|
| 11 | 10822091 | 0,727 |
| 11 | 10822478 | 0,727 |
| 11 | 10822588 | 0,737 |
| 11 | 10823741 | 0,737 |
| 11 | 10823743 | 0,727 |
| 11 | 10823926 | 0,727 |
| 11 | 10824106 | 0,727 |
| 11 | 10837928 | 0,530 |
| 11 | 10837939 | 0,530 |
| 11 | 10837998 | 0,513 |
| 11 | 10838002 | 0,513 |
| 11 | 10838148 | 0,530 |
| 11 | 10838169 | 0,530 |
| 11 | 10838568 | 0,530 |
| 11 | 10838955 | 0,513 |
| 11 | 10839092 | 0,530 |
| 11 | 10839139 | 0,530 |
| 11 | 10840571 | 0,513 |
| 11 | 10841501 | 0,513 |
| 11 | 10841540 | 0,530 |
| 11 | 10841993 | 0,513 |
| 11 | 10846116 | 0,513 |
| 11 | 10846236 | 0,513 |
| 11 | 10846688 | 0,513 |
| 11 | 10852113 | 0,513 |
| 11 | 10852200 | 0,513 |
| 11 | 10852229 | 0,513 |
| 11 | 10852425 | 0,530 |
| 11 | 10852544 | 0,513 |
| 11 | 10852549 | 0,513 |
| 11 | 10853097 | 0,530 |
| 11 | 10853602 | 0,513 |
| 11 | 10853633 | 0,513 |
| 11 | 10854252 | 0,513 |
| 11 | 10855980 | 0,513 |
| 11 | 10859250 | 0,513 |
| 11 | 10859648 | 0,513 |
| 11 | 10859885 | 0,513 |
| 11 | 10862542 | 0,530 |
| 11 | 10862543 | 0,530 |
| 11 | 10862890 | 0,530 |
| 11 | 10862958 | 0,513 |
| 11 | 10863630 | 0,530 |
| 11 | 10863728 | 0,530 |
| 11 | 10864120 | 0,513 |
| 11 | 10864250 | 0,513 |
| 11 | 10864301 | 0,513 |
| 11 | 10864499 | 0,513 |



|    |          |       |
|----|----------|-------|
| 11 | 10865662 | 0,530 |
| 11 | 10865965 | 0,530 |
| 11 | 10866497 | 0,530 |
| 11 | 10866785 | 0,530 |
| 11 | 10867353 | 0,530 |
| 11 | 10867454 | 0,530 |
| 11 | 10867456 | 0,530 |
| 11 | 10867543 | 0,530 |
| 11 | 10867580 | 0,530 |
| 11 | 10867739 | 0,530 |
| 11 | 10868298 | 0,530 |
| 11 | 10869817 | 0,530 |
| 11 | 10869828 | 0,530 |
| 11 | 10869851 | 0,530 |
| 11 | 10870090 | 0,530 |
| 11 | 10870096 | 0,530 |
| 11 | 10870139 | 0,530 |
| 11 | 10870400 | 0,530 |
| 11 | 10870694 | 0,530 |
| 11 | 10871954 | 0,513 |
| 11 | 10874165 | 0,513 |
| 11 | 10875132 | 0,513 |
| 11 | 10876127 | 0,513 |
| 11 | 10876276 | 0,530 |
| 11 | 10876277 | 0,530 |
| 11 | 10876471 | 0,530 |
| 11 | 10876494 | 0,530 |
| 11 | 10876676 | 0,530 |
| 11 | 10876721 | 0,530 |
| 11 | 10877005 | 0,530 |
| 11 | 10877246 | 0,513 |
| 11 | 10877386 | 0,513 |
| 11 | 10877876 | 0,530 |
| 11 | 10877917 | 0,530 |
| 11 | 10878685 | 0,530 |
| 11 | 10878688 | 0,530 |
| 11 | 10878781 | 0,513 |
| 11 | 10879638 | 0,530 |
| 11 | 10880246 | 0,513 |
| 11 | 10880669 | 0,530 |
| 11 | 10880903 | 0,513 |
| 11 | 10880957 | 0,513 |
| 11 | 10881572 | 0,530 |
| 11 | 10881655 | 0,530 |
| 11 | 10884221 | 0,530 |
| 11 | 10884397 | 0,530 |
| 11 | 10884970 | 0,513 |
| 11 | 10885502 | 0,513 |

|    |          |       |
|----|----------|-------|
| 11 | 10885741 | 0,530 |
| 11 | 10885745 | 0,530 |
| 11 | 10886842 | 0,513 |
| 11 | 10886905 | 0,530 |
| 11 | 10886908 | 0,530 |
| 11 | 10887444 | 0,530 |
| 11 | 10888086 | 0,530 |
| 11 | 10890078 | 0,530 |
| 11 | 10890308 | 0,513 |
| 11 | 10891303 | 0,530 |
| 11 | 10891726 | 0,530 |
| 11 | 10892317 | 0,530 |
| 11 | 10892735 | 0,530 |
| 11 | 10893921 | 0,530 |
| 11 | 10894448 | 0,513 |
| 11 | 10895757 | 0,513 |
| 11 | 10896453 | 0,513 |
| 11 | 10896564 | 0,513 |
| 11 | 10896632 | 0,530 |
| 11 | 10896636 | 0,530 |
| 11 | 10896776 | 0,513 |
| 11 | 10896974 | 0,513 |
| 11 | 10897059 | 0,513 |
| 11 | 10897346 | 0,513 |
| 11 | 10898609 | 0,530 |
| 11 | 10898841 | 0,530 |
| 11 | 10900601 | 0,513 |
| 11 | 10900946 | 0,513 |
| 11 | 10901391 | 0,530 |
| 11 | 10901738 | 0,513 |
| 11 | 10902242 | 0,530 |
| 11 | 10902245 | 0,530 |
| 11 | 10905011 | 0,513 |
| 11 | 10907308 | 0,513 |
| 11 | 10910426 | 0,530 |
| 11 | 10913315 | 0,513 |
| 11 | 10913353 | 0,513 |
| 11 | 10913402 | 0,513 |
| 11 | 10913403 | 0,513 |
| 11 | 10914665 | 0,513 |
| 11 | 10914967 | 0,530 |
| 11 | 10915523 | 0,513 |
| 11 | 10915754 | 0,530 |
| 11 | 10916008 | 0,513 |
| 11 | 10916091 | 0,513 |
| 11 | 10916107 | 0,513 |
| 11 | 10916637 | 0,513 |
| 11 | 10916658 | 0,513 |

|    |          |       |
|----|----------|-------|
| 11 | 10916719 | 0,513 |
| 11 | 10917615 | 0,513 |
| 11 | 10917904 | 0,530 |
| 11 | 10918229 | 0,513 |
| 11 | 10921045 | 0,513 |
| 11 | 10923056 | 0,513 |
| 11 | 10923076 | 0,513 |
| 11 | 10923116 | 0,513 |
| 11 | 10923900 | 0,530 |
| 11 | 10924784 | 0,513 |
| 11 | 10925149 | 0,530 |
| 11 | 10928216 | 0,530 |
| 11 | 10928455 | 0,513 |
| 11 | 10929781 | 0,530 |
| 11 | 10930363 | 0,513 |
| 11 | 10931242 | 0,513 |
| 11 | 10931652 | 0,513 |
| 11 | 10931663 | 0,513 |
| 11 | 10931861 | 0,513 |
| 11 | 10932311 | 0,530 |
| 11 | 10932352 | 0,530 |
| 11 | 10932429 | 0,530 |
| 11 | 10934126 | 0,513 |
| 11 | 10934138 | 0,513 |
| 11 | 10934291 | 0,530 |
| 11 | 10934400 | 0,530 |
| 11 | 10934472 | 0,530 |
| 11 | 10934670 | 0,530 |
| 11 | 10934718 | 0,530 |
| 11 | 10934968 | 0,530 |
| 11 | 10935154 | 0,530 |
| 11 | 10935273 | 0,530 |
| 11 | 10935284 | 0,530 |
| 11 | 10935566 | 0,530 |
| 11 | 10935590 | 0,530 |
| 11 | 10935718 | 0,530 |
| 11 | 10935736 | 0,530 |
| 11 | 10936029 | 0,530 |
| 11 | 10936030 | 0,530 |
| 11 | 10936034 | 0,530 |
| 11 | 10936604 | 0,530 |
| 11 | 10936606 | 0,530 |
| 11 | 10938108 | 0,513 |
| 11 | 10938318 | 0,513 |
| 11 | 10938324 | 0,513 |
| 11 | 10938957 | 0,530 |
| 11 | 10941369 | 0,530 |
| 11 | 10941386 | 0,530 |

|    |          |       |
|----|----------|-------|
| 11 | 10941704 | 0,530 |
| 11 | 10941981 | 0,513 |
| 11 | 10942405 | 0,513 |
| 11 | 10942457 | 0,530 |
| 11 | 10942693 | 0,530 |
| 11 | 10942716 | 0,530 |
| 11 | 10943407 | 0,530 |
| 11 | 10943600 | 0,513 |
| 11 | 10945116 | 0,530 |
| 11 | 10945969 | 0,513 |
| 11 | 10946122 | 0,513 |
| 11 | 10946377 | 0,513 |
| 11 | 10946647 | 0,530 |
| 11 | 10946803 | 0,530 |
| 11 | 10947075 | 0,530 |
| 11 | 10947822 | 0,530 |
| 11 | 10947906 | 0,530 |
| 11 | 10947923 | 0,530 |
| 11 | 10949415 | 0,530 |
| 11 | 10949461 | 0,530 |
| 11 | 10950412 | 0,513 |
| 11 | 10950743 | 0,530 |
| 11 | 10950762 | 0,530 |
| 11 | 10950788 | 0,727 |
| 11 | 10952281 | 0,513 |
| 11 | 10952747 | 0,530 |
| 11 | 10953262 | 0,727 |
| 11 | 10953408 | 0,727 |
| 11 | 10954346 | 0,530 |
| 11 | 10954358 | 0,727 |
| 11 | 10954488 | 0,530 |
| 11 | 10955086 | 0,513 |
| 11 | 10955575 | 0,727 |
| 11 | 10955939 | 0,727 |
| 11 | 10957853 | 0,727 |
| 11 | 10959366 | 0,727 |
| 11 | 10959419 | 0,727 |
| 11 | 10959585 | 0,530 |
| 11 | 10959587 | 0,530 |
| 11 | 10959662 | 0,530 |
| 11 | 10959667 | 0,530 |
| 11 | 10959687 | 0,530 |
| 11 | 10959709 | 0,530 |
| 11 | 10960087 | 0,513 |
| 11 | 10960119 | 0,513 |
| 11 | 10960153 | 0,513 |
| 11 | 10960325 | 0,530 |
| 11 | 10961774 | 0,727 |

|    |          |       |
|----|----------|-------|
| 11 | 10962174 | 0,513 |
| 11 | 10963161 | 0,727 |
| 11 | 10963346 | 0,530 |
| 11 | 10963352 | 0,530 |
| 11 | 10963357 | 0,530 |
| 11 | 10963520 | 0,530 |
| 11 | 10964270 | 0,727 |
| 11 | 10964369 | 0,530 |
| 11 | 10964588 | 0,727 |
| 11 | 10964947 | 0,727 |
| 11 | 10966134 | 0,727 |
| 11 | 10966615 | 0,513 |
| 11 | 10966619 | 0,727 |
| 11 | 10967047 | 0,530 |
| 11 | 10967052 | 0,530 |
| 11 | 10967357 | 0,727 |
| 11 | 10967806 | 0,727 |
| 11 | 10968077 | 0,530 |
| 11 | 10968078 | 0,530 |
| 11 | 10968588 | 0,727 |
| 11 | 10968589 | 0,727 |
| 11 | 10969032 | 0,727 |
| 11 | 10969075 | 0,727 |
| 11 | 10969089 | 0,727 |
| 11 | 10969181 | 0,530 |
| 11 | 10969377 | 0,530 |
| 11 | 10969378 | 0,727 |
| 11 | 10969891 | 0,727 |
| 11 | 10970290 | 0,530 |
| 11 | 10970479 | 0,727 |
| 11 | 10970495 | 0,513 |
| 11 | 10970660 | 0,513 |
| 11 | 10972354 | 0,727 |
| 11 | 10972807 | 0,727 |
| 11 | 10972810 | 0,727 |
| 11 | 10972990 | 0,513 |
| 11 | 10973749 | 0,513 |
| 11 | 10973807 | 0,513 |
| 11 | 10974067 | 0,513 |
| 11 | 10974651 | 0,530 |
| 11 | 10974887 | 0,530 |
| 11 | 10975527 | 0,530 |
| 11 | 10975534 | 0,530 |
| 11 | 10975911 | 0,530 |
| 11 | 10976041 | 0,530 |
| 11 | 10976815 | 0,530 |
| 11 | 10976961 | 0,530 |
| 11 | 10977136 | 0,530 |

|    |          |       |
|----|----------|-------|
| 11 | 10977445 | 0,513 |
| 11 | 10977872 | 0,513 |
| 11 | 10977919 | 0,513 |
| 11 | 10977990 | 0,513 |
| 11 | 10978371 | 0,530 |
| 11 | 10978506 | 0,530 |
| 11 | 10978677 | 0,513 |
| 11 | 10978792 | 0,513 |
| 11 | 10978844 | 0,513 |
| 11 | 10979528 | 0,513 |
| 11 | 10979544 | 0,513 |
| 11 | 10981399 | 0,530 |
| 11 | 10982246 | 0,530 |
| 11 | 10982458 | 0,530 |
| 11 | 10984026 | 0,513 |
| 11 | 10984669 | 0,530 |
| 11 | 10985025 | 0,513 |
| 11 | 10985225 | 0,530 |
| 11 | 10985792 | 0,513 |
| 11 | 10985945 | 0,530 |
| 11 | 10986002 | 0,530 |
| 11 | 10987055 | 0,727 |
| 11 | 10987057 | 0,530 |
| 11 | 10987417 | 0,530 |
| 11 | 10987510 | 0,530 |
| 11 | 10987588 | 0,727 |
| 11 | 10987719 | 0,727 |
| 11 | 10987770 | 0,727 |
| 11 | 10988409 | 0,530 |
| 11 | 10988433 | 0,727 |
| 11 | 10988507 | 0,727 |
| 11 | 10988642 | 0,727 |
| 11 | 10988649 | 0,727 |
| 11 | 10989140 | 0,727 |
| 11 | 10989471 | 0,727 |
| 11 | 10990100 | 0,727 |
| 11 | 10990379 | 0,727 |
| 11 | 10990533 | 0,727 |
| 11 | 10990564 | 0,727 |
| 11 | 10990994 | 0,727 |
| 11 | 10991142 | 0,727 |
| 11 | 10991320 | 0,727 |
| 11 | 10991422 | 0,727 |
| 11 | 10991454 | 0,727 |
| 11 | 10991833 | 0,727 |
| 11 | 10992547 | 0,727 |
| 11 | 10992680 | 0,727 |
| 11 | 10992698 | 0,727 |

|    |          |       |
|----|----------|-------|
| 11 | 10992715 | 0,727 |
| 11 | 10992910 | 0,727 |
| 11 | 10992934 | 0,727 |
| 11 | 10992964 | 0,727 |
| 11 | 10993081 | 0,727 |
| 11 | 10993736 | 0,727 |
| 11 | 10993738 | 0,727 |
| 11 | 10993748 | 0,727 |
| 11 | 10994410 | 0,513 |
| 11 | 10994432 | 0,727 |
| 11 | 10994606 | 0,727 |
| 11 | 10994613 | 0,727 |
| 11 | 10994786 | 0,727 |
| 11 | 10994789 | 0,727 |
| 11 | 10994946 | 0,513 |
| 11 | 10994979 | 0,513 |
| 11 | 10995065 | 0,727 |
| 11 | 10995311 | 0,727 |
| 11 | 10995523 | 0,530 |
| 11 | 10995848 | 0,530 |
| 11 | 10995968 | 0,727 |
| 11 | 10996259 | 0,727 |
| 11 | 10996412 | 0,727 |
| 11 | 10996423 | 0,727 |
| 11 | 10996430 | 0,727 |
| 11 | 10996433 | 0,727 |
| 11 | 10996439 | 0,727 |
| 11 | 10996456 | 0,727 |
| 11 | 10996487 | 0,727 |
| 11 | 10996502 | 0,727 |
| 11 | 10996613 | 0,530 |
| 11 | 10996776 | 0,727 |
| 11 | 10996971 | 0,727 |
| 11 | 10997222 | 0,727 |
| 11 | 10998018 | 0,727 |
| 11 | 10998102 | 0,727 |
| 11 | 10998340 | 0,530 |
| 11 | 10998776 | 0,530 |
| 11 | 10998793 | 0,530 |
| 11 | 10998794 | 0,530 |
| 11 | 10999285 | 0,513 |
| 11 | 10999409 | 0,530 |
| 11 | 10999411 | 0,530 |
| 11 | 10999817 | 0,727 |
| 11 | 10999875 | 0,530 |
| 11 | 11000624 | 0,513 |
| 11 | 11001215 | 0,513 |
| 11 | 11001474 | 0,727 |

|    |          |       |
|----|----------|-------|
| 11 | 11001818 | 0,513 |
| 11 | 11002148 | 0,530 |
| 11 | 11003436 | 0,727 |
| 11 | 11003544 | 0,727 |
| 11 | 11003875 | 0,727 |
| 11 | 11004288 | 0,727 |
| 11 | 11004349 | 0,727 |
| 11 | 11004460 | 0,530 |
| 11 | 11004814 | 0,727 |
| 11 | 11004819 | 0,727 |
| 11 | 11006167 | 0,513 |
| 11 | 11006750 | 0,513 |
| 11 | 11007102 | 0,530 |
| 11 | 11007277 | 0,513 |
| 11 | 11007572 | 0,513 |
| 11 | 11007810 | 0,513 |
| 11 | 11008221 | 0,530 |
| 11 | 11008223 | 0,530 |
| 11 | 11008490 | 0,530 |
| 11 | 11008504 | 0,530 |
| 11 | 11008517 | 0,530 |
| 11 | 11008535 | 0,530 |
| 11 | 11008572 | 0,513 |
| 11 | 11009587 | 0,513 |
| 11 | 11009922 | 0,530 |
| 11 | 11010051 | 0,530 |
| 11 | 11010330 | 0,530 |
| 11 | 11010538 | 0,530 |
| 11 | 11010557 | 0,530 |
| 11 | 11010558 | 0,530 |
| 11 | 11010663 | 0,513 |
| 11 | 11010681 | 0,513 |
| 11 | 11011382 | 0,513 |
| 11 | 11012529 | 0,513 |
| 11 | 11012708 | 0,513 |
| 11 | 11012734 | 0,513 |
| 11 | 11013023 | 0,513 |
| 11 | 11013156 | 0,513 |
| 11 | 11013194 | 0,513 |
| 11 | 11013228 | 0,513 |
| 11 | 11013847 | 0,513 |
| 11 | 11014194 | 0,530 |
| 11 | 11014199 | 0,530 |
| 11 | 11014253 | 0,530 |
| 11 | 11014265 | 0,530 |
| 11 | 11014917 | 0,530 |
| 11 | 11014971 | 0,513 |
| 11 | 11015185 | 0,513 |



|    |          |       |
|----|----------|-------|
| 11 | 11015375 | 0,530 |
| 11 | 11016491 | 0,530 |
| 11 | 11016513 | 0,530 |
| 11 | 11017373 | 0,530 |
| 11 | 11017709 | 0,513 |
| 11 | 11017765 | 0,513 |
| 11 | 11018973 | 0,513 |
| 11 | 11019291 | 0,530 |
| 11 | 11019864 | 0,530 |
| 11 | 11019992 | 0,530 |
| 11 | 11020407 | 0,513 |
| 11 | 11020534 | 0,530 |
| 11 | 11020946 | 0,530 |
| 11 | 11020952 | 0,530 |
| 11 | 11021259 | 0,530 |
| 11 | 11022723 | 0,530 |
| 11 | 11023065 | 0,530 |
| 11 | 11024606 | 0,727 |
| 11 | 11025090 | 0,513 |
| 11 | 11027002 | 0,530 |
| 11 | 11032273 | 0,513 |
| 11 | 11034704 | 0,530 |
| 11 | 11034705 | 0,530 |
| 11 | 11035434 | 0,530 |
| 11 | 11035456 | 0,530 |
| 11 | 11036267 | 0,513 |
| 11 | 11036797 | 0,530 |
| 11 | 11036799 | 0,530 |
| 11 | 11036985 | 0,513 |
| 11 | 11037115 | 0,513 |
| 11 | 11037191 | 0,513 |
| 11 | 11037510 | 0,513 |
| 11 | 11037768 | 0,513 |
| 11 | 11038187 | 0,530 |
| 11 | 11038631 | 0,513 |
| 11 | 11038643 | 0,513 |
| 11 | 11039796 | 0,513 |
| 11 | 11039878 | 0,530 |
| 11 | 11040046 | 0,530 |
| 11 | 11040422 | 0,530 |
| 11 | 11040677 | 0,530 |
| 11 | 11040948 | 0,530 |
| 11 | 11042425 | 0,530 |
| 11 | 11062513 | 0,530 |
| 11 | 11062517 | 0,530 |
| 11 | 11065538 | 0,530 |
| 11 | 11068902 | 0,530 |
| 11 | 11068948 | 0,530 |

|    |          |       |
|----|----------|-------|
| 11 | 11069082 | 0,530 |
| 11 | 11069180 | 0,530 |
| 11 | 11069791 | 0,530 |
| 11 | 11070079 | 0,513 |
| 11 | 11070144 | 0,513 |
| 11 | 11070155 | 0,513 |
| 11 | 11070302 | 0,513 |
| 11 | 11070317 | 0,513 |
| 11 | 11070542 | 0,530 |
| 11 | 11071901 | 0,530 |
| 11 | 11071905 | 0,530 |
| 11 | 11072620 | 0,530 |
| 11 | 11072880 | 0,513 |
| 11 | 11073303 | 0,530 |
| 11 | 11073304 | 0,530 |
| 11 | 11075788 | 0,513 |
| 11 | 11075803 | 0,513 |
| 11 | 11075910 | 0,513 |
| 11 | 11076759 | 0,530 |
| 11 | 11077037 | 0,513 |
| 11 | 11078220 | 0,513 |
| 11 | 11078660 | 0,513 |
| 11 | 11079095 | 0,530 |
| 11 | 11079104 | 0,530 |
| 11 | 11079296 | 0,513 |
| 11 | 11079329 | 0,513 |
| 11 | 11079917 | 0,513 |
| 11 | 11081837 | 0,513 |
| 11 | 11081958 | 0,513 |
| 11 | 11081973 | 0,513 |
| 11 | 11081982 | 0,513 |
| 11 | 11082321 | 0,530 |
| 11 | 11082334 | 0,530 |
| 11 | 11082335 | 0,530 |
| 11 | 11082499 | 0,530 |
| 11 | 11082511 | 0,530 |
| 11 | 11082567 | 0,530 |
| 11 | 11083659 | 0,513 |
| 11 | 11083684 | 0,513 |
| 11 | 11083719 | 0,513 |
| 11 | 11083728 | 0,513 |
| 11 | 11083744 | 0,513 |
| 11 | 11083782 | 0,513 |
| 11 | 11083795 | 0,513 |
| 11 | 11083840 | 0,530 |
| 11 | 11083912 | 0,513 |
| 11 | 11084475 | 0,513 |
| 11 | 11086318 | 0,530 |

|    |          |       |
|----|----------|-------|
| 11 | 11086339 | 0,530 |
| 11 | 11086383 | 0,530 |
| 11 | 11086398 | 0,530 |
| 11 | 11086794 | 0,513 |
| 11 | 11086887 | 0,513 |
| 11 | 11087134 | 0,513 |
| 11 | 11087238 | 0,513 |
| 11 | 11087377 | 0,530 |
| 11 | 11088763 | 0,530 |
| 11 | 11088858 | 0,530 |
| 11 | 11088859 | 0,530 |
| 11 | 11089570 | 0,513 |
| 11 | 11089850 | 0,513 |
| 11 | 11089879 | 0,513 |
| 11 | 11090958 | 0,530 |
| 11 | 11092201 | 0,513 |
| 11 | 11092209 | 0,513 |
| 11 | 11092247 | 0,513 |
| 11 | 11092253 | 0,513 |
| 11 | 11092254 | 0,513 |
| 11 | 11092744 | 0,513 |
| 11 | 11093039 | 0,530 |
| 11 | 11093060 | 0,530 |
| 11 | 11093625 | 0,530 |
| 11 | 11093967 | 0,513 |
| 11 | 11094924 | 0,513 |
| 11 | 11095233 | 0,513 |
| 11 | 11095246 | 0,513 |
| 11 | 11095264 | 0,513 |
| 11 | 11096287 | 0,513 |
| 11 | 11096522 | 0,513 |
| 11 | 11096761 | 0,513 |
| 11 | 11097695 | 0,513 |
| 11 | 11098293 | 0,737 |
| 11 | 11098306 | 0,513 |
| 11 | 11098771 | 0,513 |
| 11 | 11099662 | 0,530 |
| 11 | 11099671 | 0,530 |
| 11 | 11099719 | 0,530 |
| 11 | 11099724 | 0,530 |
| 11 | 11099758 | 0,530 |
| 11 | 11099772 | 0,530 |
| 11 | 11099774 | 0,530 |
| 11 | 11099776 | 0,530 |
| 11 | 11099785 | 0,530 |
| 11 | 11100082 | 0,530 |
| 11 | 11100090 | 0,530 |
| 11 | 11100097 | 0,530 |

|    |          |       |
|----|----------|-------|
| 11 | 11100564 | 0,513 |
| 11 | 11101336 | 0,513 |
| 11 | 11101361 | 0,513 |
| 11 | 11101366 | 0,513 |
| 11 | 11101369 | 0,513 |
| 11 | 11101868 | 0,530 |
| 11 | 11103342 | 0,737 |
| 11 | 11103621 | 0,737 |
| 11 | 11103773 | 0,737 |
| 11 | 11103785 | 0,737 |
| 11 | 11103791 | 0,737 |
| 11 | 11104483 | 0,737 |
| 11 | 11104581 | 0,513 |
| 11 | 11104780 | 0,513 |
| 11 | 11104783 | 0,513 |
| 11 | 11104784 | 0,513 |
| 11 | 11104801 | 0,513 |
| 11 | 11107029 | 0,530 |
| 11 | 11107331 | 0,513 |
| 11 | 11107358 | 0,513 |
| 11 | 11107988 | 0,737 |
| 11 | 11108448 | 0,737 |
| 11 | 11108526 | 0,737 |
| 11 | 11109015 | 0,737 |
| 11 | 11109662 | 0,530 |
| 11 | 11109750 | 0,530 |
| 11 | 11111242 | 0,737 |
| 11 | 11111340 | 0,737 |
| 11 | 11111561 | 0,737 |
| 11 | 11111578 | 0,737 |
| 11 | 11112078 | 0,737 |
| 11 | 11112117 | 0,737 |
| 11 | 11112198 | 0,737 |
| 11 | 11112404 | 0,737 |
| 11 | 11112422 | 0,737 |
| 11 | 11112454 | 0,737 |
| 11 | 11112487 | 0,513 |
| 11 | 11113082 | 0,737 |
| 11 | 11113514 | 0,513 |
| 11 | 11114069 | 0,530 |
| 11 | 11114073 | 0,530 |
| 11 | 11114935 | 0,737 |
| 11 | 11115210 | 0,737 |
| 11 | 11115748 | 0,737 |
| 11 | 11116073 | 0,513 |
| 11 | 11116139 | 0,737 |
| 11 | 11117516 | 0,617 |
| 11 | 11117755 | 0,617 |

|    |          |       |
|----|----------|-------|
| 11 | 11117756 | 0,617 |
| 11 | 11118222 | 0,623 |
| 11 | 11118483 | 0,623 |
| 11 | 11119177 | 0,617 |
| 11 | 11119236 | 0,623 |
| 11 | 11120440 | 0,617 |
| 11 | 11120644 | 0,617 |
| 11 | 11120686 | 0,617 |
| 11 | 11120806 | 0,623 |
| 11 | 11120944 | 0,617 |
| 11 | 11120994 | 0,623 |
| 11 | 11121274 | 0,617 |
| 11 | 11121286 | 0,617 |
| 11 | 11121318 | 0,617 |
| 11 | 11121324 | 0,623 |
| 11 | 11121405 | 0,617 |
| 11 | 11121825 | 0,617 |
| 11 | 11121851 | 0,617 |
| 11 | 11121900 | 0,617 |
| 11 | 11122370 | 0,623 |
| 11 | 11122432 | 0,623 |
| 11 | 11122519 | 0,617 |
| 11 | 11122533 | 0,617 |
| 11 | 11125287 | 0,623 |
| 11 | 11125290 | 0,617 |
| 11 | 11158770 | 0,623 |
| 11 | 11159133 | 0,623 |
| 11 | 11159277 | 0,623 |
| 11 | 11159420 | 0,623 |
| 11 | 11159574 | 0,617 |
| 11 | 11159881 | 0,617 |
| 11 | 11160096 | 0,617 |
| 11 | 11160217 | 0,617 |
| 11 | 11160219 | 0,617 |
| 11 | 11161187 | 0,623 |
| 11 | 11161398 | 0,623 |
| 11 | 11161472 | 0,623 |
| 11 | 11161649 | 0,623 |
| 11 | 11161815 | 0,623 |
| 11 | 11161960 | 0,623 |
| 11 | 11161994 | 0,623 |
| 11 | 11162043 | 0,623 |
| 11 | 11162197 | 0,623 |
| 11 | 11162384 | 0,623 |
| 11 | 11162499 | 0,623 |
| 11 | 11162557 | 0,623 |
| 11 | 11162568 | 0,623 |
| 11 | 11162688 | 0,623 |

|    |          |       |
|----|----------|-------|
| 11 | 11162746 | 0,623 |
| 11 | 11163268 | 0,623 |
| 11 | 11163283 | 0,623 |
| 11 | 11163416 | 0,623 |
| 11 | 11163718 | 0,623 |
| 11 | 11165089 | 0,623 |
| 11 | 11165206 | 0,623 |
| 11 | 11165435 | 0,623 |
| 11 | 11165488 | 0,623 |
| 11 | 11165585 | 0,623 |
| 11 | 11165636 | 0,623 |
| 11 | 11165726 | 0,623 |
| 11 | 11165757 | 0,623 |
| 11 | 11165818 | 0,623 |
| 11 | 11165848 | 0,623 |
| 11 | 11165875 | 0,623 |
| 11 | 11165890 | 0,623 |
| 11 | 11166036 | 0,623 |
| 11 | 11166094 | 0,623 |
| 11 | 11166116 | 0,623 |
| 11 | 11166163 | 0,623 |
| 11 | 11166204 | 0,623 |
| 11 | 11166205 | 0,617 |
| 11 | 11166613 | 0,623 |
| 11 | 11166638 | 0,623 |
| 11 | 11166783 | 0,623 |
| 11 | 11168423 | 0,623 |
| 11 | 11168425 | 0,623 |
| 11 | 11169724 | 0,623 |
| 11 | 11169949 | 0,623 |
| 11 | 11170554 | 0,623 |
| 11 | 11170635 | 0,623 |
| 11 | 11170969 | 0,623 |
| 11 | 11171045 | 0,623 |
| 11 | 11171546 | 0,617 |
| 11 | 11172150 | 0,623 |
| 11 | 11172166 | 0,623 |
| 11 | 11172233 | 0,623 |
| 11 | 11172261 | 0,623 |
| 11 | 11172558 | 0,623 |
| 11 | 11173252 | 0,623 |
| 11 | 11173283 | 0,623 |
| 11 | 11173343 | 0,623 |
| 11 | 11174462 | 0,623 |
| 11 | 11175562 | 0,623 |
| 11 | 11175577 | 0,623 |
| 11 | 11175578 | 0,623 |
| 11 | 11176166 | 0,623 |

|    |          |       |
|----|----------|-------|
| 11 | 11176997 | 0,623 |
| 11 | 11178913 | 0,623 |
| 11 | 11180458 | 0,623 |
| 11 | 11180872 | 0,623 |
| 11 | 11181545 | 0,623 |
| 11 | 11182954 | 0,623 |
| 11 | 11183177 | 0,623 |
| 11 | 11183255 | 0,623 |
| 11 | 11187036 | 0,623 |
| 11 | 11188159 | 0,617 |
| 11 | 11188195 | 0,617 |
| 11 | 11193646 | 0,617 |
| 11 | 11193682 | 0,617 |
| 11 | 11193817 | 0,617 |
| 11 | 11194727 | 0,617 |
| 11 | 11195009 | 0,617 |
| 11 | 11195579 | 0,623 |
| 11 | 11195765 | 0,617 |
| 11 | 11195766 | 0,617 |
| 11 | 11195924 | 0,617 |
| 11 | 11198573 | 0,623 |
| 11 | 11199373 | 0,623 |
| 11 | 11200132 | 0,617 |
| 11 | 11200356 | 0,617 |
| 11 | 11201901 | 0,623 |
| 11 | 11202143 | 0,617 |
| 11 | 11202272 | 0,617 |
| 11 | 11202943 | 0,617 |
| 11 | 11203023 | 0,617 |
| 11 | 11203136 | 0,617 |
| 11 | 11204217 | 0,623 |
| 11 | 11204624 | 0,623 |
| 11 | 11204702 | 0,623 |
| 11 | 11204847 | 0,623 |
| 11 | 11204904 | 0,623 |
| 11 | 11245902 | 0,613 |
| 11 | 11246208 | 0,623 |
| 11 | 11246740 | 0,603 |
| 11 | 11246802 | 0,623 |
| 11 | 11246821 | 0,623 |
| 11 | 11247074 | 0,603 |
| 11 | 11247518 | 0,623 |
| 11 | 11247782 | 0,603 |
| 11 | 11247792 | 0,623 |
| 11 | 11248133 | 0,613 |
| 11 | 11248171 | 0,613 |
| 11 | 11248221 | 0,613 |
| 11 | 11248227 | 0,603 |

|    |          |       |
|----|----------|-------|
| 11 | 11248229 | 0,613 |
| 11 | 11248346 | 0,613 |
| 11 | 11248354 | 0,613 |
| 11 | 11248382 | 0,603 |
| 11 | 11248447 | 0,603 |
| 11 | 11248503 | 0,603 |
| 11 | 11248587 | 0,623 |
| 11 | 11248961 | 0,623 |
| 11 | 11249588 | 0,603 |
| 11 | 11251912 | 0,603 |
| 11 | 11252308 | 0,603 |
| 11 | 11252311 | 0,638 |
| 11 | 11252356 | 0,603 |
| 11 | 11252407 | 0,628 |
| 11 | 11252869 | 0,613 |
| 11 | 11253263 | 0,623 |
| 11 | 11253296 | 0,623 |
| 11 | 11253527 | 0,623 |
| 11 | 11253536 | 0,623 |
| 11 | 11253545 | 0,613 |
| 11 | 11253650 | 0,623 |
| 11 | 11254276 | 0,628 |
| 11 | 11254406 | 0,623 |
| 11 | 11254489 | 0,628 |
| 11 | 11254620 | 0,628 |
| 11 | 11255095 | 0,623 |
| 11 | 11255621 | 0,623 |
| 11 | 11255834 | 0,623 |
| 11 | 11256119 | 0,623 |
| 11 | 11256350 | 0,628 |
| 11 | 11256653 | 0,628 |
| 11 | 11256776 | 0,623 |
| 11 | 11256960 | 0,623 |
| 11 | 11257435 | 0,623 |
| 11 | 11258032 | 0,628 |
| 11 | 11259059 | 0,623 |
| 11 | 11259313 | 0,623 |
| 11 | 11259378 | 0,617 |
| 11 | 11259941 | 0,623 |
| 11 | 11259976 | 0,623 |
| 11 | 11260044 | 0,623 |
| 11 | 11260323 | 0,628 |
| 11 | 11260512 | 0,623 |
| 11 | 11261212 | 0,623 |
| 11 | 11261868 | 0,623 |
| 11 | 11261958 | 0,623 |
| 11 | 11261963 | 0,623 |
| 11 | 11262215 | 0,623 |



|    |          |       |
|----|----------|-------|
| 11 | 11262843 | 0,628 |
| 11 | 11263242 | 0,628 |
| 11 | 11263263 | 0,628 |
| 11 | 11263410 | 0,628 |
| 11 | 11263456 | 0,628 |
| 11 | 11263763 | 0,628 |
| 11 | 11264370 | 0,628 |
| 11 | 11264606 | 0,628 |
| 11 | 11265358 | 0,623 |
| 11 | 11265574 | 0,623 |
| 11 | 11266256 | 0,623 |
| 11 | 11266434 | 0,628 |
| 11 | 11271668 | 0,628 |
| 11 | 11271848 | 0,623 |
| 11 | 11272001 | 0,623 |
| 11 | 11273584 | 0,623 |
| 11 | 11277509 | 0,623 |
| 11 | 11278110 | 0,623 |
| 11 | 11278128 | 0,623 |

**Table S11.** SNPs with allele-frequency difference > 0.5 in purging region in HW lineage on chromosome 20 (10.6-10.7 Mb). Loci highlighted in green were tag SNPs selected by backward-elimination analysis in this region.

| Chromosome | Position | AFD   |
|------------|----------|-------|
| 20         | 10666379 | 0,584 |
| 20         | 10666401 | 0,584 |
| 20         | 10666405 | 0,584 |
| 20         | 10666480 | 0,584 |
| 20         | 10666681 | 0,756 |
| 20         | 10667370 | 0,722 |
| 20         | 10667575 | 0,722 |
| 20         | 10667817 | 0,544 |
| 20         | 10668030 | 0,722 |
| 20         | 10668353 | 0,561 |
| 20         | 10668737 | 0,722 |
| 20         | 10668758 | 0,756 |
| 20         | 10669071 | 0,756 |
| 20         | 10669160 | 0,756 |
| 20         | 10670059 | 0,756 |
| 20         | 10670133 | 0,756 |
| 20         | 10670134 | 0,756 |
| 20         | 10670532 | 0,618 |
| 20         | 10670663 | 0,618 |
| 20         | 10671067 | 0,618 |
| 20         | 10671147 | 0,618 |
| 20         | 10671528 | 0,584 |
| 20         | 10671690 | 0,584 |
| 20         | 10671955 | 0,618 |
| 20         | 10671976 | 0,584 |
| 20         | 10672006 | 0,618 |
| 20         | 10672027 | 0,584 |
| 20         | 10672079 | 0,756 |
| 20         | 10673132 | 0,756 |
| 20         | 10674284 | 0,722 |
| 20         | 10674488 | 0,756 |
| 20         | 10675275 | 0,544 |
| 20         | 10676908 | 0,618 |
| 20         | 10676992 | 0,618 |
| 20         | 10677008 | 0,618 |
| 20         | 10677015 | 0,618 |
| 20         | 10677032 | 0,756 |
| 20         | 10677033 | 0,756 |
| 20         | 10677856 | 0,756 |
| 20         | 10679133 | 0,584 |
| 20         | 10679199 | 0,618 |
| 20         | 10679508 | 0,756 |
| 20         | 10679799 | 0,756 |
| 20         | 10680453 | 0,756 |

|    |          |       |
|----|----------|-------|
| 20 | 10681113 | 0,756 |
| 20 | 10681200 | 0,756 |
| 20 | 10681426 | 0,756 |
| 20 | 10681505 | 0,584 |
| 20 | 10681580 | 0,722 |
| 20 | 10681733 | 0,756 |
| 20 | 10681734 | 0,584 |
| 20 | 10681777 | 0,722 |
| 20 | 10681815 | 0,756 |
| 20 | 10682220 | 0,756 |
| 20 | 10683397 | 0,722 |
| 20 | 10683918 | 0,756 |
| 20 | 10684497 | 0,578 |
| 20 | 10685645 | 0,578 |
| 20 | 10685893 | 0,756 |
| 20 | 10686088 | 0,756 |
| 20 | 10686093 | 0,756 |
| 20 | 10686696 | 0,756 |
| 20 | 10686784 | 0,756 |
| 20 | 10686846 | 0,584 |
| 20 | 10686869 | 0,584 |
| 20 | 10687583 | 0,618 |
| 20 | 10688489 | 0,756 |
| 20 | 10689504 | 0,722 |
| 20 | 10689579 | 0,756 |
| 20 | 10689690 | 0,618 |
| 20 | 10689738 | 0,756 |
| 20 | 10690403 | 0,756 |
| 20 | 10690458 | 0,584 |
| 20 | 10690466 | 0,618 |
| 20 | 10690475 | 0,618 |
| 20 | 10690583 | 0,756 |
| 20 | 10690705 | 0,578 |
| 20 | 10690733 | 0,578 |
| 20 | 10691133 | 0,578 |
| 20 | 10691241 | 0,584 |
| 20 | 10691942 | 0,756 |
| 20 | 10692256 | 0,756 |
| 20 | 10692761 | 0,561 |
| 20 | 10692840 | 0,756 |
| 20 | 10692982 | 0,561 |
| 20 | 10692983 | 0,561 |
| 20 | 10693029 | 0,756 |
| 20 | 10693074 | 0,722 |
| 20 | 10693494 | 0,756 |
| 20 | 10694352 | 0,561 |
| 20 | 10694362 | 0,561 |
| 20 | 10694698 | 0,544 |

|    |          |       |
|----|----------|-------|
| 20 | 10694866 | 0,756 |
| 20 | 10694883 | 0,618 |
| 20 | 10695265 | 0,756 |
| 20 | 10695286 | 0,561 |
| 20 | 10695415 | 0,756 |
| 20 | 10695430 | 0,756 |
| 20 | 10695468 | 0,756 |
| 20 | 10695687 | 0,756 |
| 20 | 10695798 | 0,561 |
| 20 | 10696021 | 0,756 |
| 20 | 10696133 | 0,722 |
| 20 | 10696574 | 0,578 |
| 20 | 10696585 | 0,578 |
| 20 | 10696616 | 0,578 |
| 20 | 10696694 | 0,756 |
| 20 | 10696839 | 0,756 |
| 20 | 10697106 | 0,756 |
| 20 | 10697486 | 0,618 |
| 20 | 10697489 | 0,618 |
| 20 | 10698092 | 0,756 |
| 20 | 10698564 | 0,618 |
| 20 | 10698810 | 0,756 |
| 20 | 10698949 | 0,756 |
| 20 | 10699052 | 0,756 |
| 20 | 10699774 | 0,756 |
| 20 | 10700425 | 0,756 |
| 20 | 10700464 | 0,561 |
| 20 | 10700465 | 0,561 |
| 20 | 10701679 | 0,756 |
| 20 | 10702012 | 0,756 |
| 20 | 10702233 | 0,756 |
| 20 | 10702244 | 0,561 |
| 20 | 10702439 | 0,756 |
| 20 | 10703091 | 0,722 |
| 20 | 10703278 | 0,756 |
| 20 | 10703922 | 0,527 |
| 20 | 10704869 | 0,756 |
| 20 | 10705422 | 0,756 |
| 20 | 10705665 | 0,756 |
| 20 | 10705762 | 0,722 |
| 20 | 10705834 | 0,722 |
| 20 | 10705866 | 0,722 |
| 20 | 10705980 | 0,756 |
| 20 | 10706022 | 0,578 |
| 20 | 10706169 | 0,544 |
| 20 | 10706403 | 0,722 |
| 20 | 10706424 | 0,756 |
| 20 | 10706545 | 0,527 |

|    |          |       |
|----|----------|-------|
| 20 | 10706730 | 0,756 |
| 20 | 10706744 | 0,756 |
| 20 | 10707959 | 0,544 |
| 20 | 10708043 | 0,722 |
| 20 | 10710190 | 0,756 |
| 20 | 10710332 | 0,722 |
| 20 | 10710456 | 0,544 |
| 20 | 10710474 | 0,544 |
| 20 | 10710687 | 0,756 |
| 20 | 10710814 | 0,756 |
| 20 | 10711007 | 0,561 |
| 20 | 10711063 | 0,722 |
| 20 | 10711098 | 0,527 |
| 20 | 10711138 | 0,527 |
| 20 | 10711154 | 0,756 |
| 20 | 10711474 | 0,544 |
| 20 | 10711517 | 0,722 |
| 20 | 10711694 | 0,756 |
| 20 | 10711735 | 0,756 |
| 20 | 10712151 | 0,756 |
| 20 | 10712289 | 0,544 |
| 20 | 10712420 | 0,756 |
| 20 | 10712486 | 0,756 |
| 20 | 10712698 | 0,578 |
| 20 | 10713196 | 0,578 |
| 20 | 10713571 | 0,756 |
| 20 | 10713574 | 0,756 |
| 20 | 10713600 | 0,756 |
| 20 | 10713625 | 0,756 |
| 20 | 10713630 | 0,756 |
| 20 | 10713636 | 0,756 |
| 20 | 10713644 | 0,756 |
| 20 | 10713685 | 0,756 |
| 20 | 10713707 | 0,756 |
| 20 | 10713711 | 0,756 |
| 20 | 10713812 | 0,722 |
| 20 | 10714422 | 0,756 |
| 20 | 10714425 | 0,756 |
| 20 | 10714718 | 0,756 |
| 20 | 10715095 | 0,618 |
| 20 | 10715399 | 0,561 |
| 20 | 10715401 | 0,561 |
| 20 | 10715740 | 0,618 |
| 20 | 10716887 | 0,756 |
| 20 | 10717267 | 0,722 |
| 20 | 10717433 | 0,756 |
| 20 | 10717634 | 0,618 |
| 20 | 10718530 | 0,722 |

|    |          |       |
|----|----------|-------|
| 20 | 10722552 | 0,618 |
| 20 | 10722611 | 0,756 |
| 20 | 10724776 | 0,756 |
| 20 | 10725644 | 0,561 |
| 20 | 10726091 | 0,756 |
| 20 | 10726094 | 0,609 |
| 20 | 10726714 | 0,756 |
| 20 | 10726737 | 0,722 |
| 20 | 10726743 | 0,747 |
| 20 | 10726952 | 0,756 |
| 20 | 10727568 | 0,756 |
| 20 | 10729503 | 0,634 |
| 20 | 10729674 | 0,781 |
| 20 | 10729887 | 0,772 |
| 20 | 10730019 | 0,772 |
| 20 | 10735190 | 0,806 |
| 20 | 10735238 | 0,578 |
| 20 | 10735598 | 0,781 |
| 20 | 10735664 | 0,668 |
| 20 | 10735685 | 0,806 |
| 20 | 10735787 | 0,643 |
| 20 | 10737007 | 0,806 |
| 20 | 10737060 | 0,806 |
| 20 | 10737192 | 0,578 |
| 20 | 10737362 | 0,668 |
| 20 | 10738314 | 0,561 |
| 20 | 10738326 | 0,806 |
| 20 | 10738382 | 0,806 |
| 20 | 10740762 | 0,578 |
| 20 | 10740930 | 0,561 |
| 20 | 10741543 | 0,668 |
| 20 | 10741964 | 0,772 |
| 20 | 10742547 | 0,772 |
| 20 | 10742834 | 0,668 |
| 20 | 10742889 | 0,634 |
| 20 | 10743581 | 0,806 |
| 20 | 10743752 | 0,806 |
| 20 | 10744503 | 0,772 |
| 20 | 10744554 | 0,772 |
| 20 | 10745054 | 0,527 |
| 20 | 10745058 | 0,527 |
| 20 | 10745060 | 0,527 |
| 20 | 10745263 | 0,806 |
| 20 | 10745341 | 0,772 |
| 20 | 10745712 | 0,806 |
| 20 | 10745769 | 0,772 |
| 20 | 10748859 | 0,668 |

Table S12, Haplotype frequencies for the major haplotypes segregating in the HWS41/LWS41 birds used as founders for the AIL where associations to 56 day body weights were performed in generations F2 - F15

| Location                |         |                     |                |                |                |                |                |                |                |                |                 |                 |                 |                 |                 | HWR9 |       |       |       | LWR9 |       |       |       |
|-------------------------|---------|---------------------|----------------|----------------|----------------|----------------|----------------|----------------|----------------|----------------|-----------------|-----------------|-----------------|-----------------|-----------------|------|-------|-------|-------|------|-------|-------|-------|
| Haplotype               | Lineage | Chromosome_Position | F <sub>2</sub> | F <sub>3</sub> | F <sub>4</sub> | F <sub>5</sub> | F <sub>6</sub> | F <sub>7</sub> | F <sub>8</sub> | F <sub>9</sub> | F <sub>10</sub> | F <sub>11</sub> | F <sub>13</sub> | F <sub>14</sub> | F <sub>15</sub> |      | HWS41 | HWS50 | HWS53 |      | LWS41 | LWS50 | LWS53 |
| Hap1 <sub>HC8-2</sub>   | HW      | 8_10Mb              | 0,7            | 0,7            | 0,7            | 0,7            | 0,6            | 0,6            | 0,6            | 0,7            | 0,8             | 0,8             | 0,7             | 0,7             | 0,7             | 0,0  | 0,8   | 0,4   | 0,6   | 1,0  | 0,9   | 1,0   | 1,0   |
| Hap2 <sub>HC8-2</sub>   | HW      | 8_10Mb              | 0,0            | 0,0            | 0,0            | 0,0            | 0,0            | 0,0            | 0,0            | 0,0            | 0,0             | 0,0             | 0,0             | 0,1             | 0,0             | 0,6  | 0,0   | 0,1   | 0,0   | 0,0  | 0,0   | 0,0   | 0,0   |
| Hap3 <sub>HC8-2</sub>   | HW      | 8_10Mb              | 0,1            | 0,1            | 0,1            | 0,1            | 0,2            | 0,2            | 0,2            | 0,2            | 0,1             | 0,1             | 0,1             | 0,1             | 0,2             | 0,3  | 0,1   | 0,3   | 0,2   | 0,0  | 0,1   | 0,0   | 0,0   |
| Hap1 <sub>HC20-10</sub> | HW      | 20_2Mb              | 0,5            | 0,5            | 0,5            | 0,5            | 0,5            | 0,5            | 0,5            | 0,4            | 0,5             | 0,5             | 0,5             | 0,4             | 0,4             | 0,8  | 0,1   | 0,3   | 0,3   | 1,0  | 1,0   | 1,0   | 1,0   |
| Hap2 <sub>HC20-10</sub> | HW      | 20_2Mb              | 0,3            | 0,2            | 0,3            | 0,2            | 0,2            | 0,3            | 0,2            | 0,2            | 0,2             | 0,1             | 0,1             | 0,1             | 0,1             | 0,2  | 0,3   | 0,5   | 0,3   | 0,0  | 0,0   | 0,0   | 0,0   |
| Hap3 <sub>HC20-10</sub> | HW      | 20_2Mb              | 0,2            | 0,2            | 0,2            | 0,2            | 0,3            | 0,3            | 0,4            | 0,4            | 0,4             | 0,4             | 0,4             | 0,4             | 0,4             | 0,0  | 0,5   | 0,2   | 0,4   | 0,0  | 0,0   | 0,0   | 0,0   |
| Hap1 <sub>HC6-17</sub>  | LW      | 6_17Mb              | 0,5            | 0,5            | 0,5            | 0,5            | 0,5            | 0,6            | 0,7            | 0,6            | 0,6             | 0,6             | 0,6             | 0,6             | 0,6             | 0,5  | 0,4   | 0,2   | 0,3   | 0,2  | 0,8   | 0,8   | 1,0   |
| Hap2 <sub>HC6-17</sub>  | LW      | 6_17Mb              | 0,5            | 0,5            | 0,5            | 0,5            | 0,5            | 0,4            | 0,3            | 0,4            | 0,5             | 0,4             | 0,4             | 0,4             | 0,4             | 0,5  | 0,6   | 0,8   | 0,7   | 0,8  | 0,2   | 0,3   | 0,0   |
