# Supplementary material for: Haplotype Purging after Relaxation of Selection in Lines of Chickens That Had Undergone Long-Term Selection for High and Low Body Weight
Source: MDPI journal article supplement (doi:10.3390/genes11060630), 2020-06-08
Supplement: s1 [file s1]

## **Supplementary figures S1-S15**

Haplotype purging after relaxation of selection in lines of chickens that had undergone long-term selection for high and low body weight

Yunzhou Yang, Yanjun Zan, Christa F. Honaker, Paul B. Siegel, and Örjan Carlborg

A

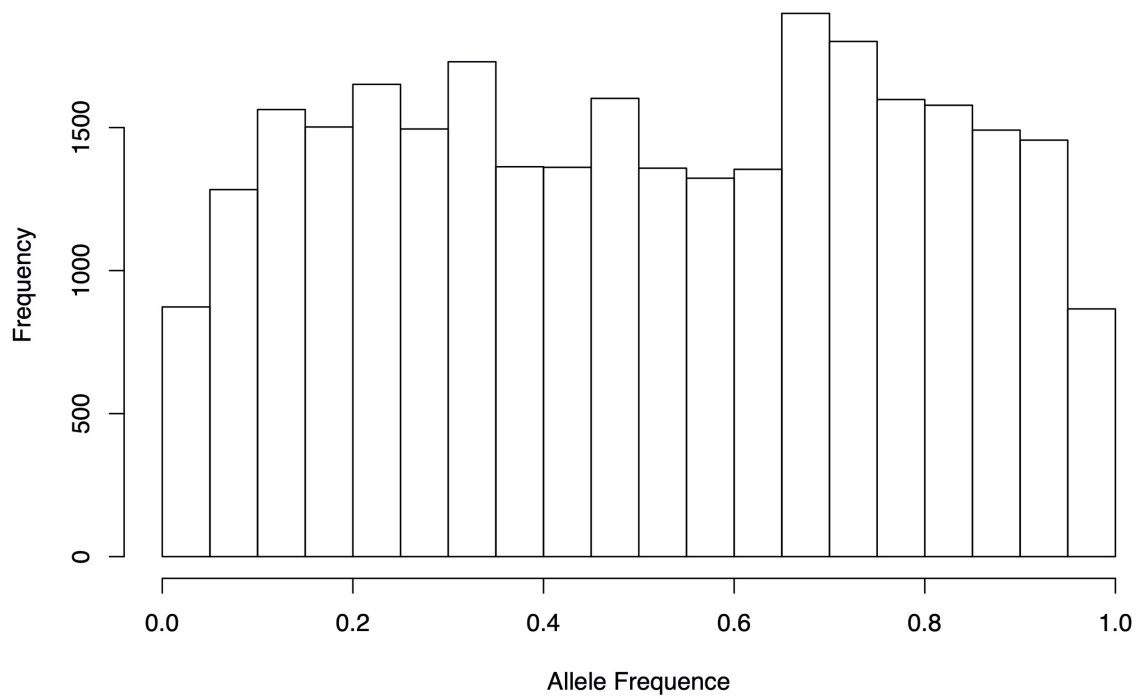

B

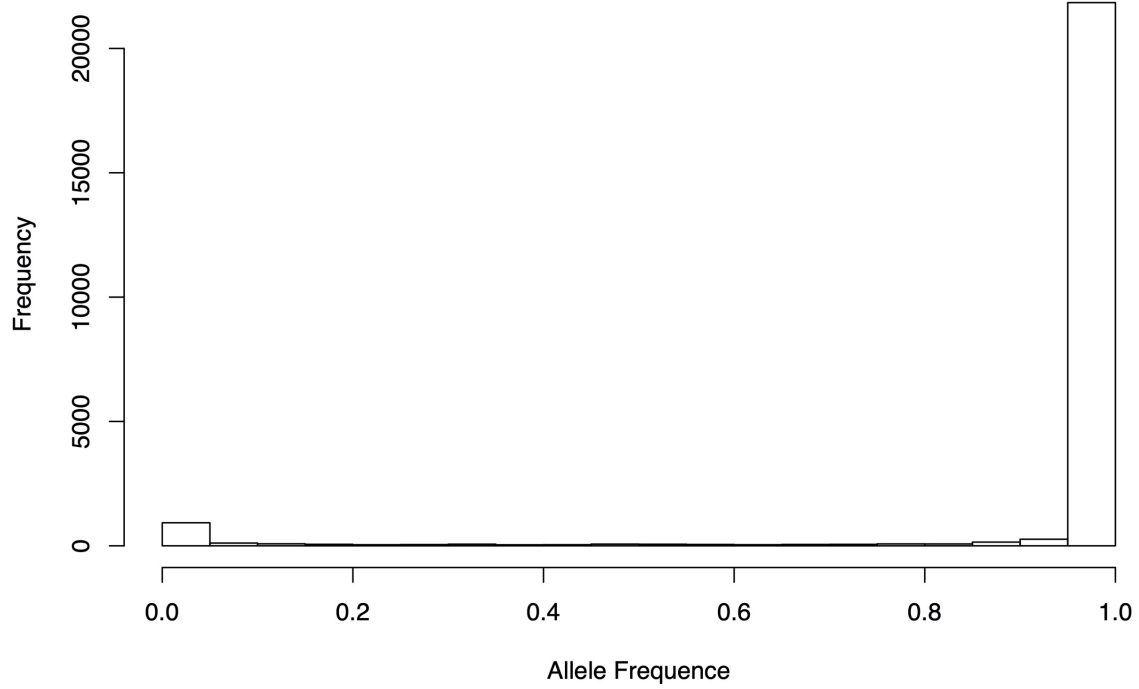

**Figure S1.** Allele frequency of single nucleotide polymorphisms (SNP) genotyped by the 60-K chicken chip. **A:** Distributions of allele frequency for 29,147 SNPs which were kept for imputation, **B:** Distributions of allele frequency for 24,166 SNPs which were filtered out.

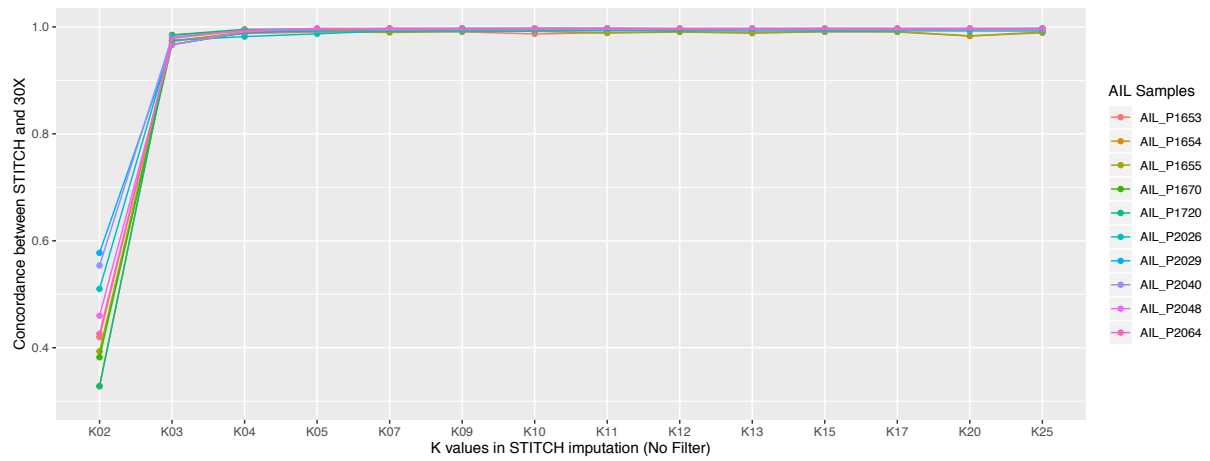

**Figure S2.** Evaluation of genotyping quality from imputation using different K-values in the *STITCH* software [25]. X-axis are the values tested for K. The Y-axis are the corresponding concordances between the genotypes scored using ~30X-depth sequencing and the *STITCH* genotypes imputed on the same individuals after down-sampling to ~0.4X using *seqtk* (<https://github.com/lh3/seqtk>).

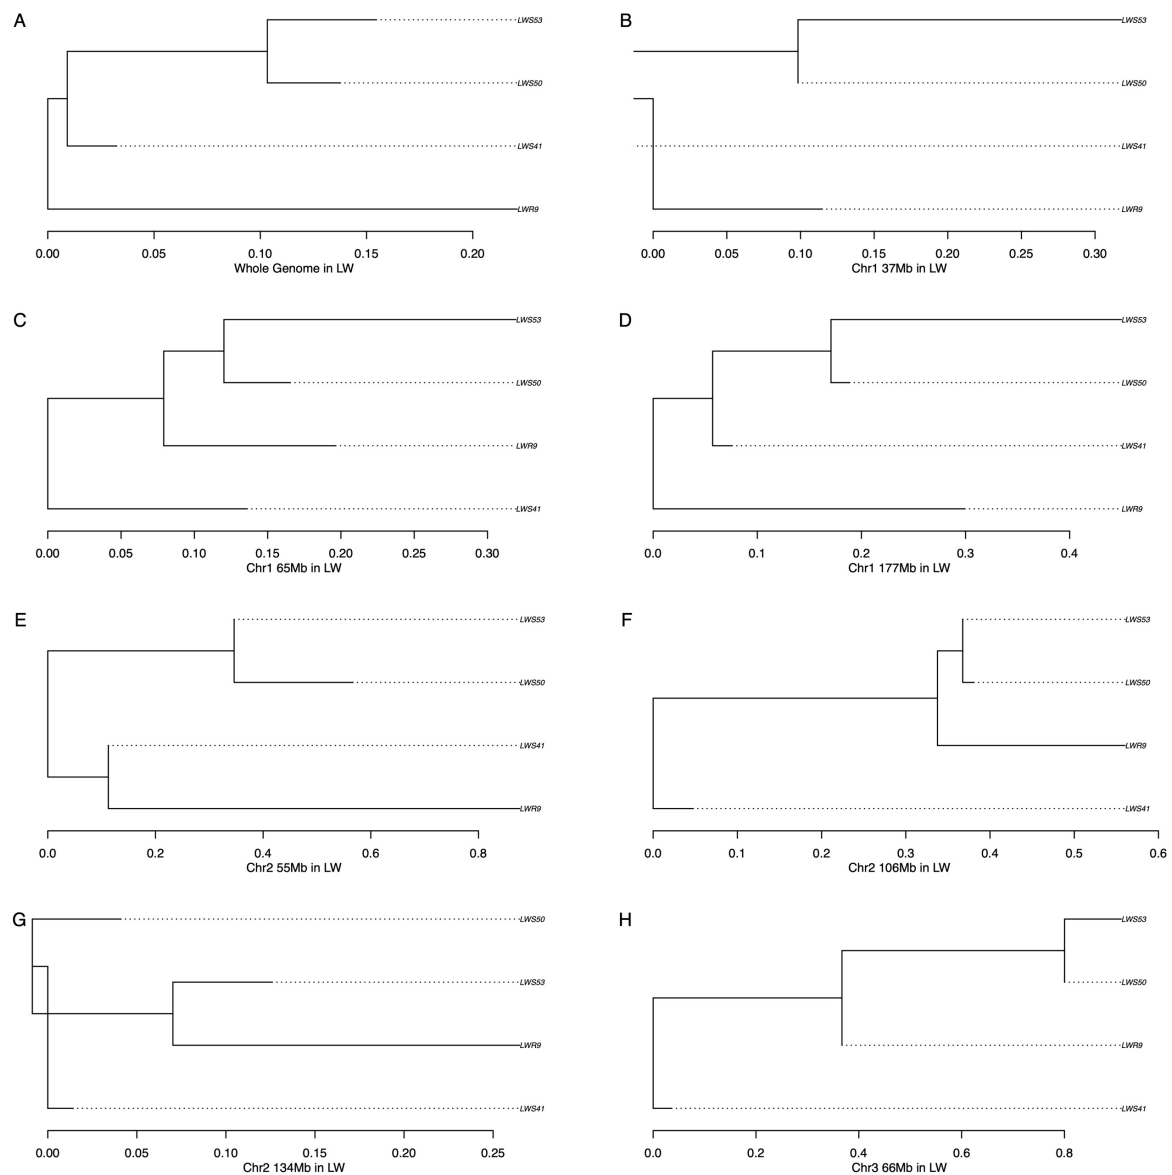

**Figure S3.** Hierarchical *hapFLK* trees for the LW lineage of the Virginia lines. **A** shows the tree constructed using whole-genome data for reference. **B-H** are the local trees constructed using genotype data for the *hapFLK* significant regions on chromosomes 1, 2, and 3.

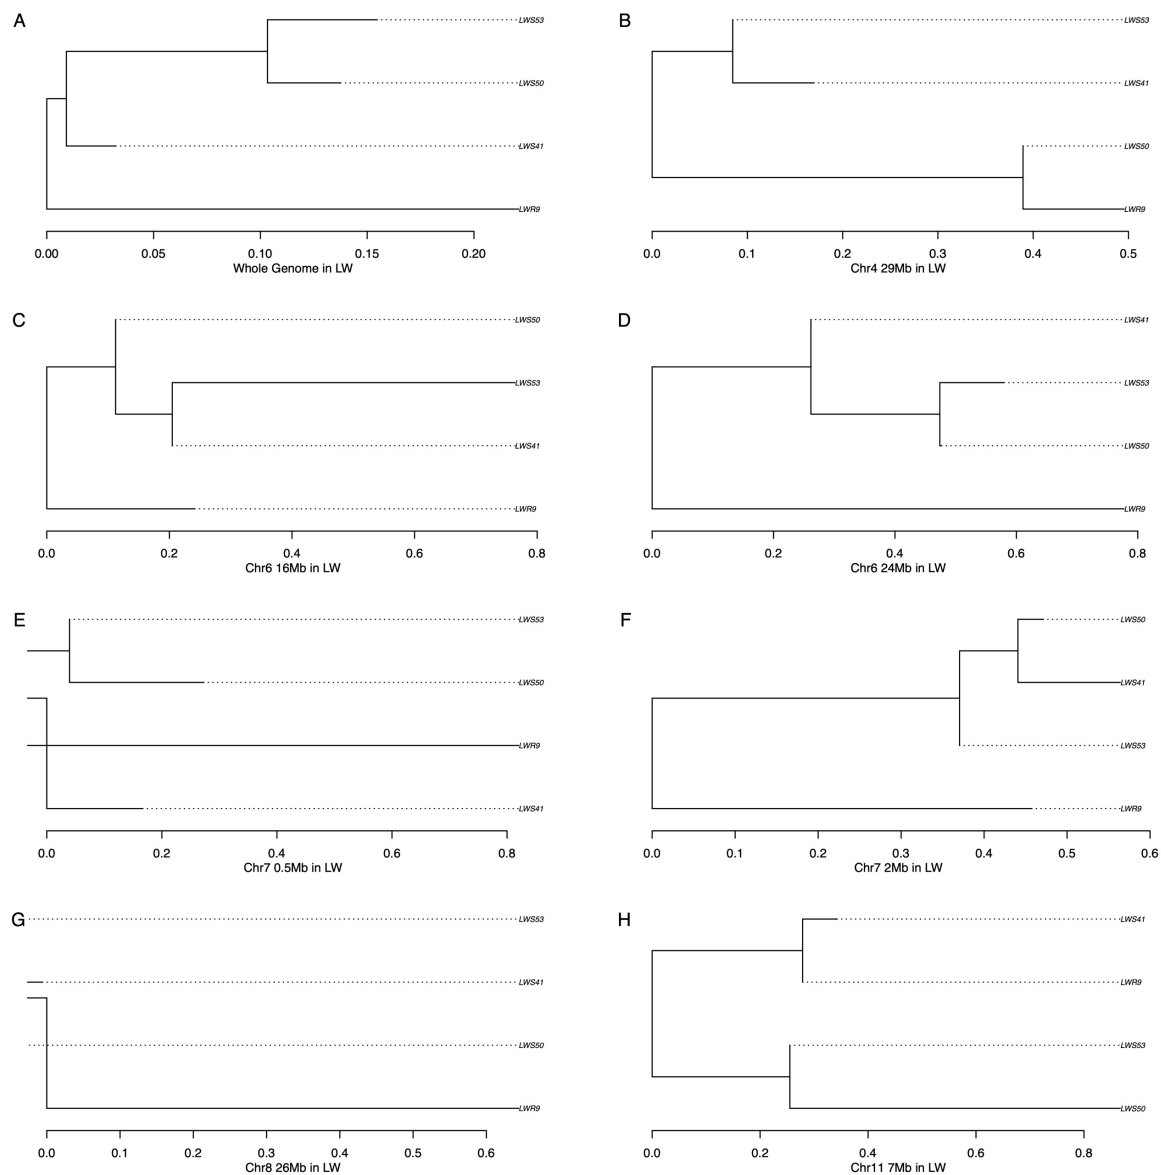

**Figure S4.** Hierarchical *hapFLK* trees for the LW lineage of the Virginia lines. **A** shows the tree constructed using whole-genome data for reference. **B-H** are the local trees constructed using genotype data for the *hapFLK* significant regions on chromosomes 4, 6, 7, 8, and 11.

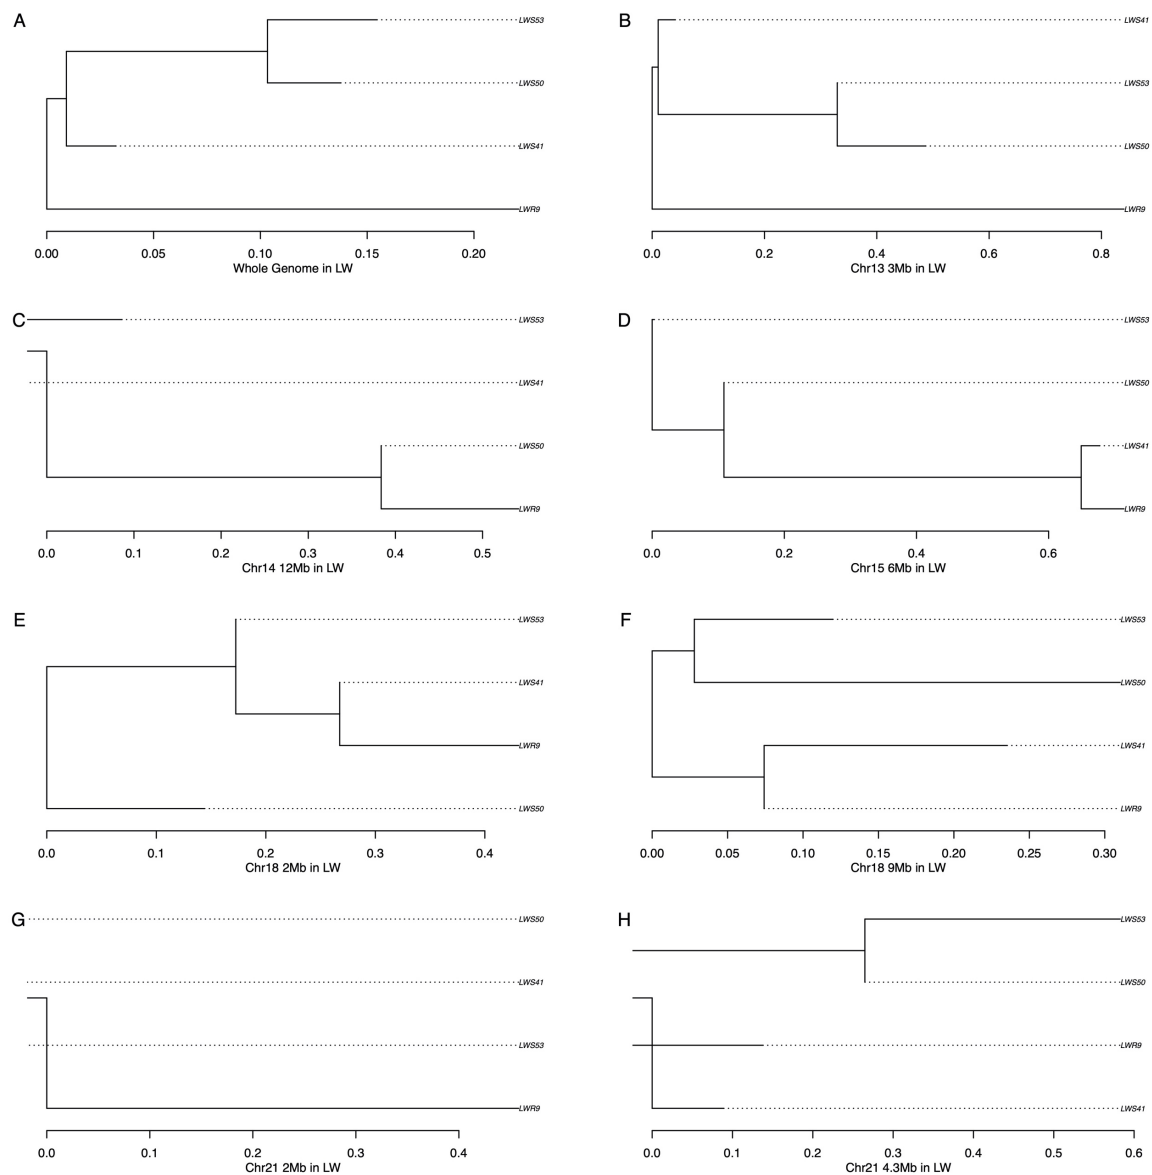

**Figure S5.** Hierarchical *hapFLK* trees for the LW lineage of the Virginia lines. **A** shows the tree constructed using whole-genome data for reference. **B-H** are the local trees constructed using genotype data for the *hapFLK* significant regions on chromosomes 13, 14, 15, 18, and 21.

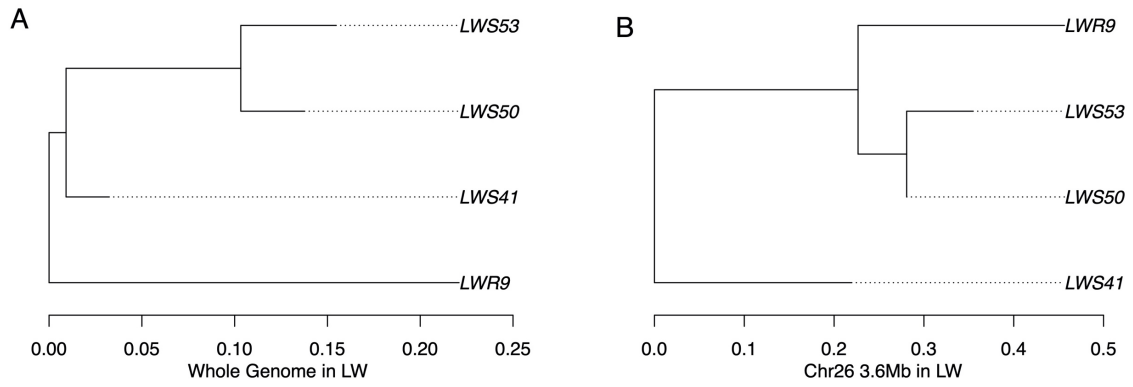

**Figure S6.** Hierarchical *hapFLK* trees for the LW lineage of the Virginia lines. **A** shows the tree constructed using whole-genome data for reference. **B** is the local tree constructed using genotype data for the *hapFLK* significant region on chromosome 26.

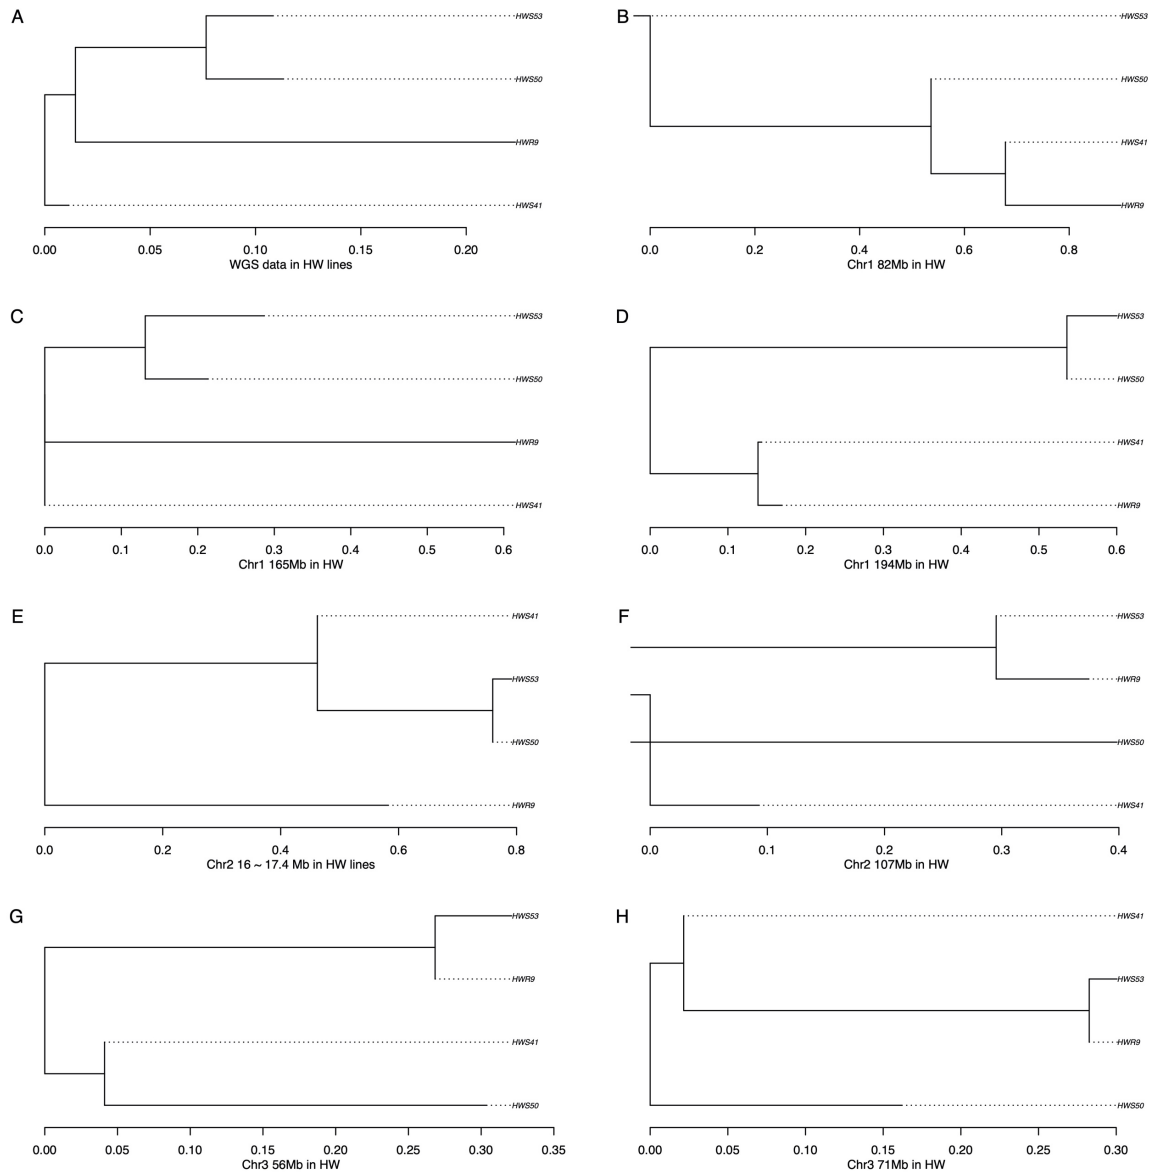

**Figure S7.** Hierarchical *hapFLK* trees for the HW lineage of the Virginia lines. **A** shows the tree constructed using whole-genome data for reference. **B-H** are the local trees constructed using genotype data for the *hapFLK* significant regions on chromosomes 1, 2, and 3.

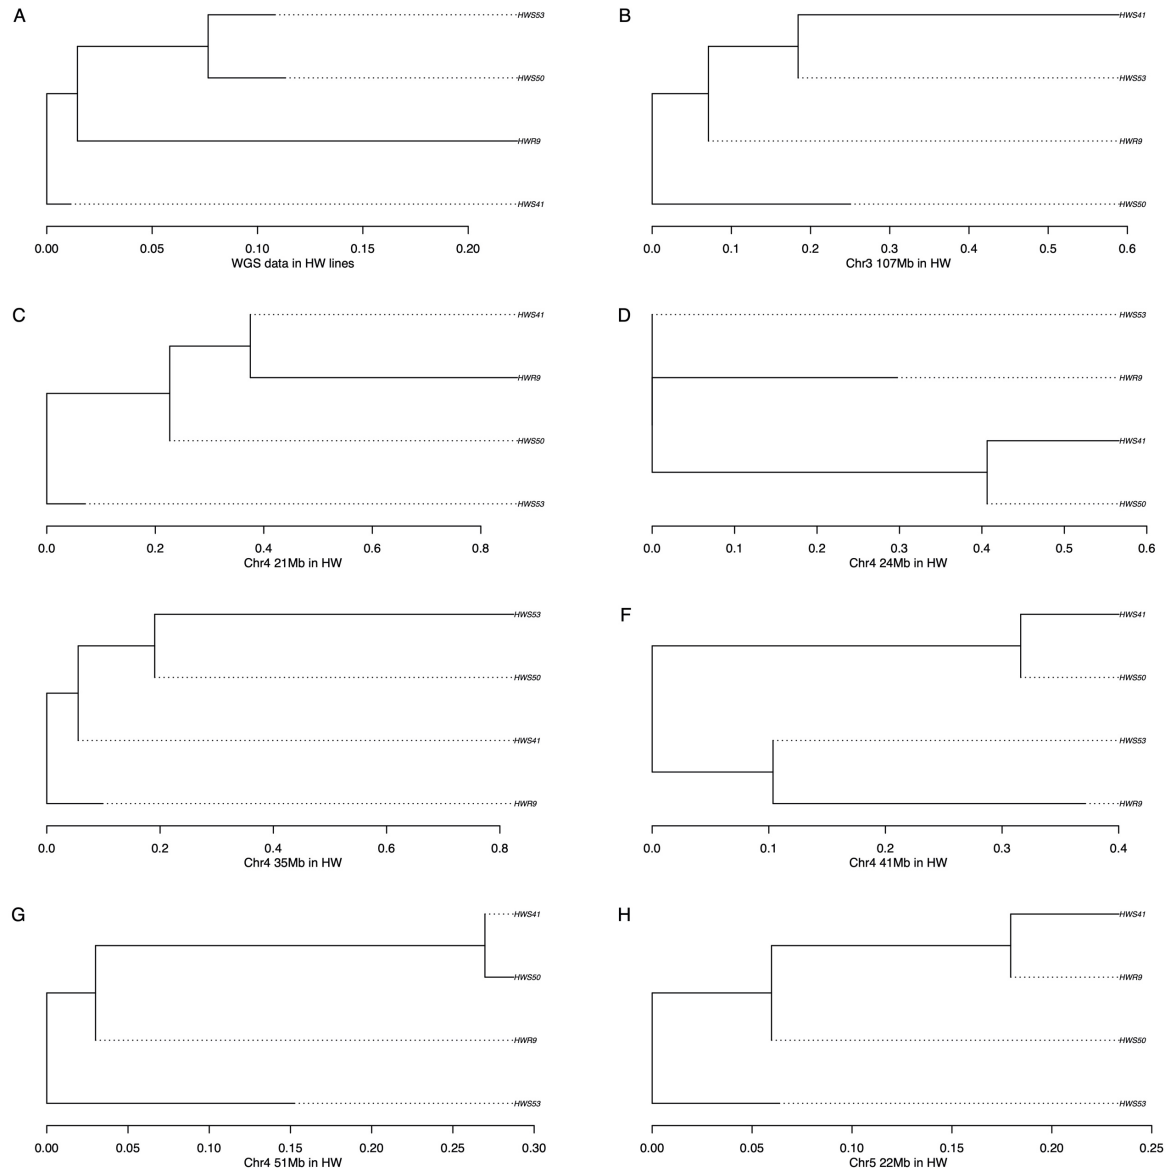

**Figure S8.** Hierarchical *hapFLK* trees for the HW lineage of the Virginia lines. **A** shows the tree constructed using whole-genome data for reference. **B-H** are the local trees constructed using genotype data for the *hapFLK* significant regions on chromosomes 3, 4, and 5.



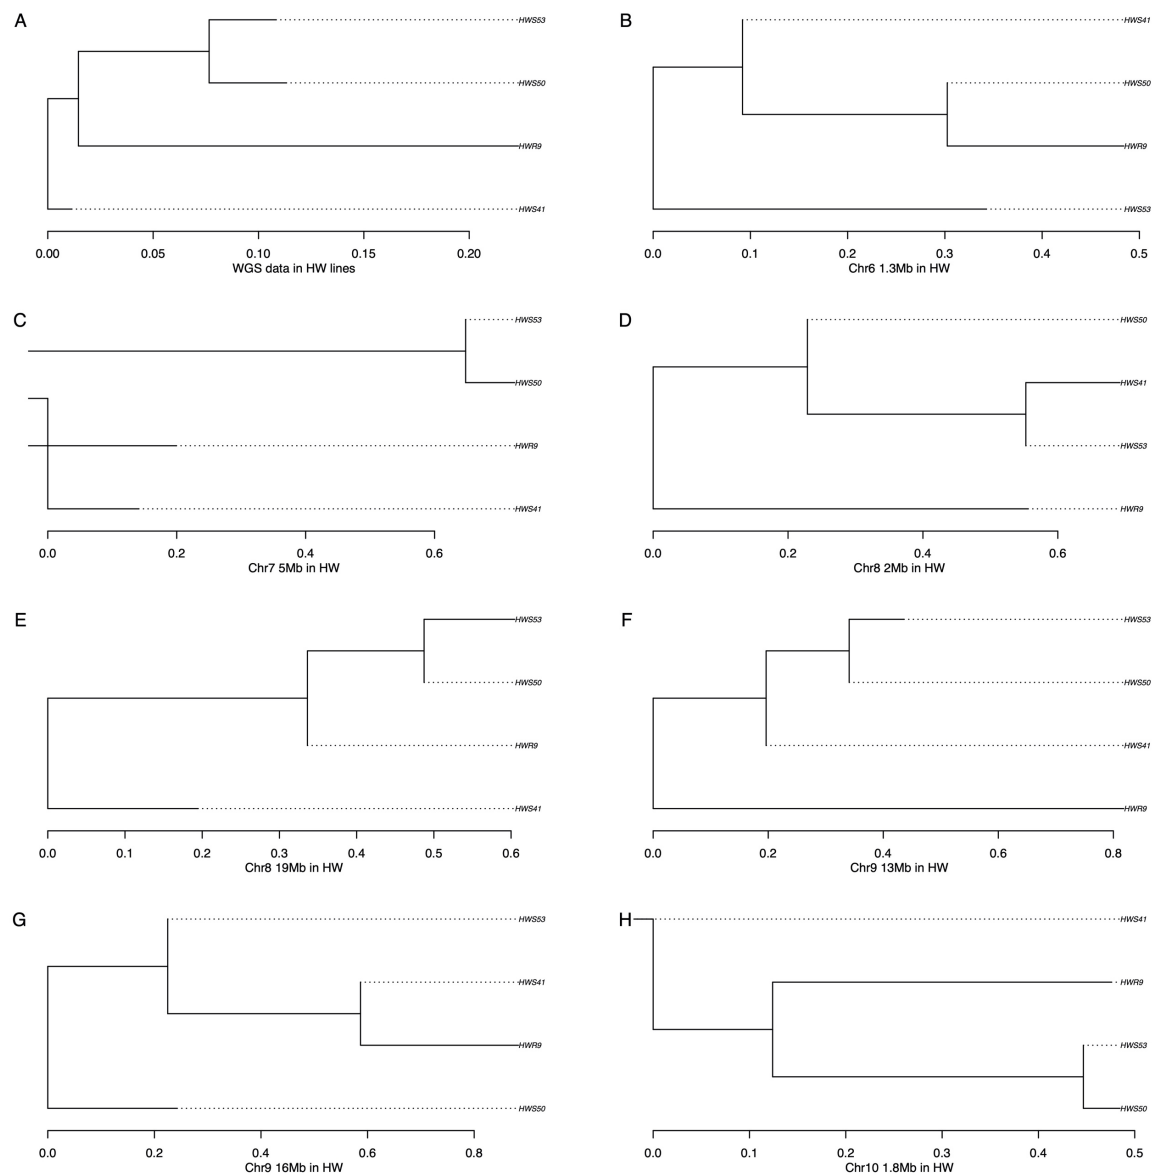

**Figure S9.** Hierarchical *hapFLK* trees for the HW lineage of the Virginia lines. **A** shows the tree constructed using whole-genome data for reference. **B-H** are the local trees constructed using genotype data for the *hapFLK* significant regions on chromosomes 6 – 10.

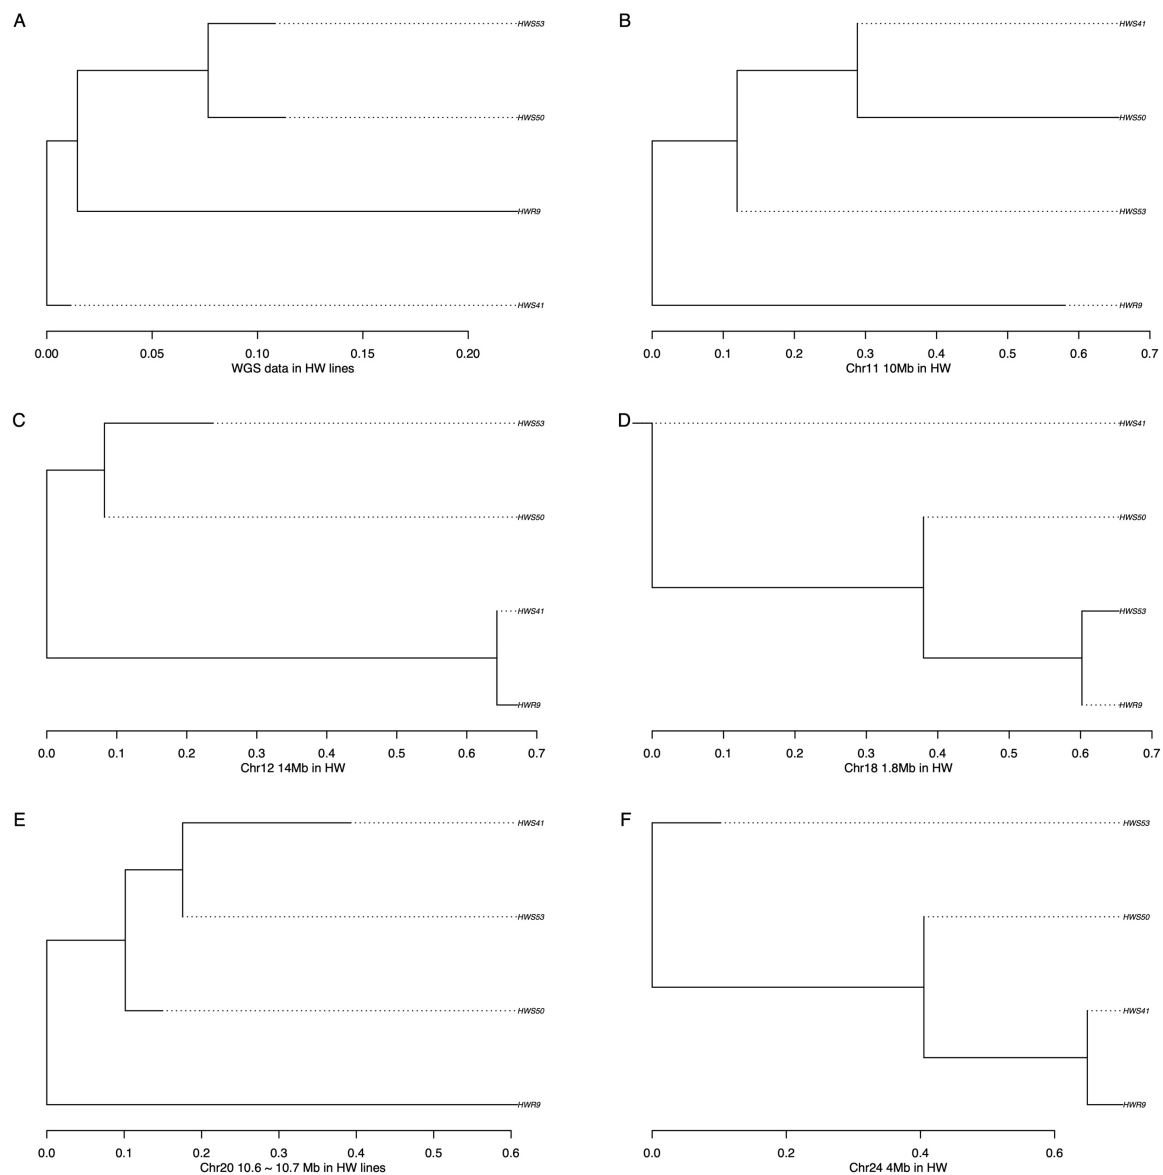

**Figure S10.** Hierarchical *hapFLK* trees for the HW lineage of the Virginia lines. **A** shows the tree constructed using whole-genome data for reference. **B-F** are the local trees constructed using genotype data for the *hapFLK* significant regions on chromosomes 11, 12, 18, 20, and 24.

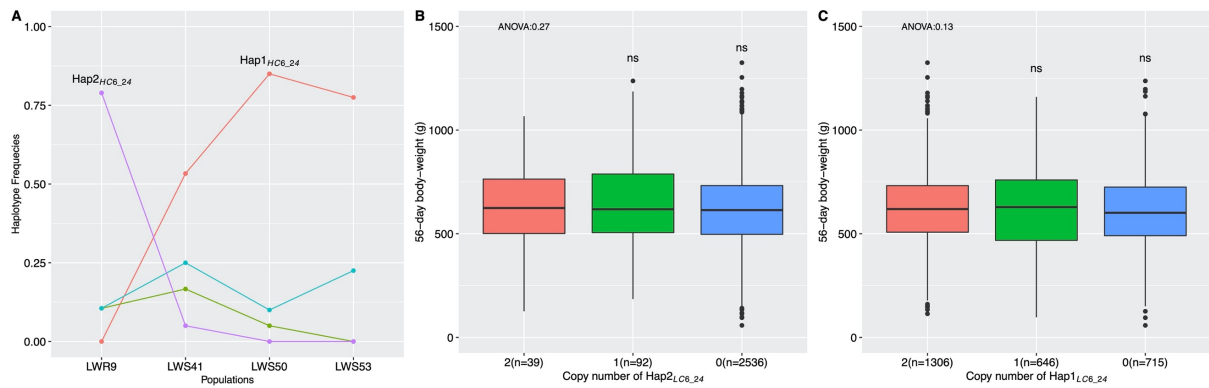

**Figure S11.** Changes in haplotype frequencies in the LW lineage (A) and associations between the major haplotypes in the relaxed (B) and selected (C) lines on chromosome 6 (~24Mb) in the AIL.

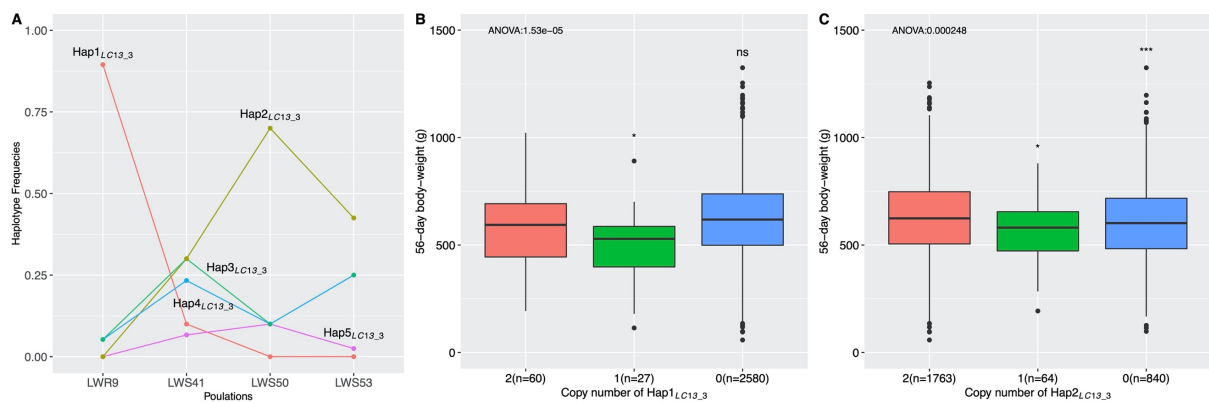

**Figure S12.** Changes in haplotype frequencies in the LW lineage (A) and associations between the major haplotypes in the relaxed (B) and selected (C) lines on chromosome 13 in the AIL.

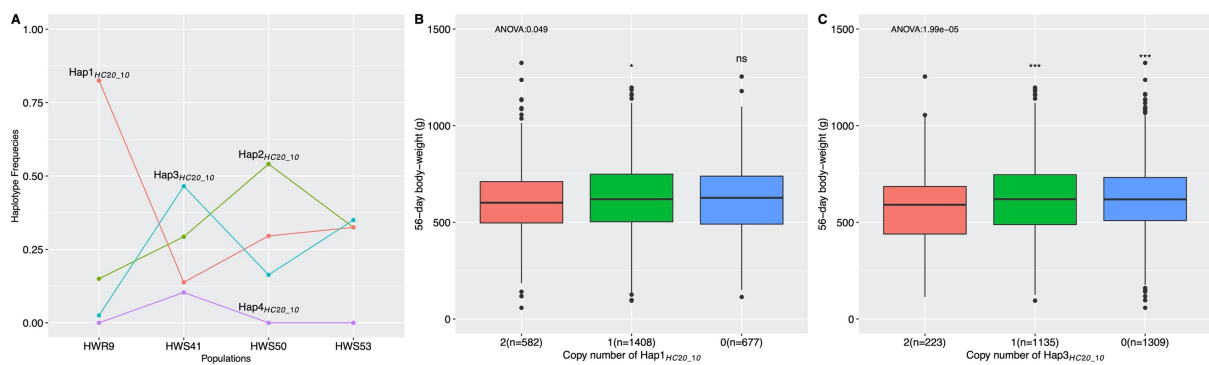

**Figure S13.** Association between the haplotype Hap3 detected on chromosome 20 in HW lineage in the AIL. Hap3 is the second most common selected haplotype and significantly related to body weight.

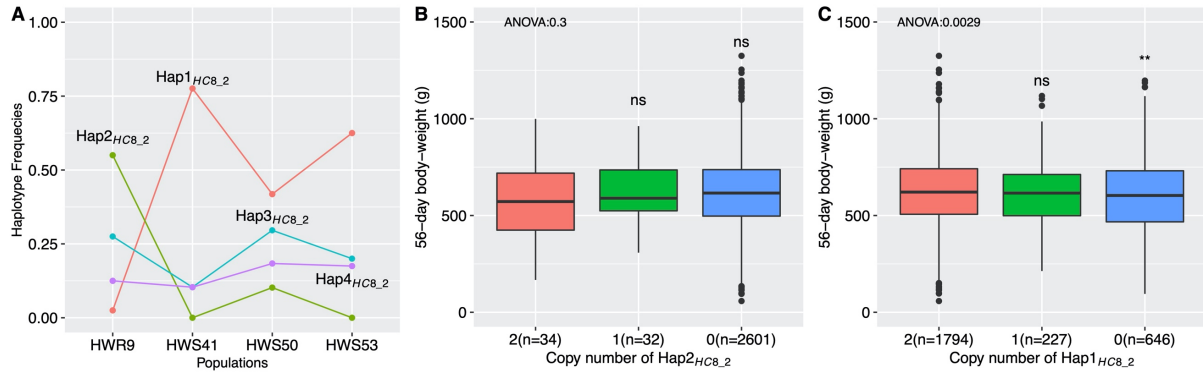

**Figure S14.** Association between the haplotype Hap2<sub>HC8\_2</sub> on chromosome8 in HW lineage and 56-day body weight. Hap2<sub>HC8\_2</sub> was the most common haplotype in relaxed lines but had no significant relation to 56-day body weight (B).

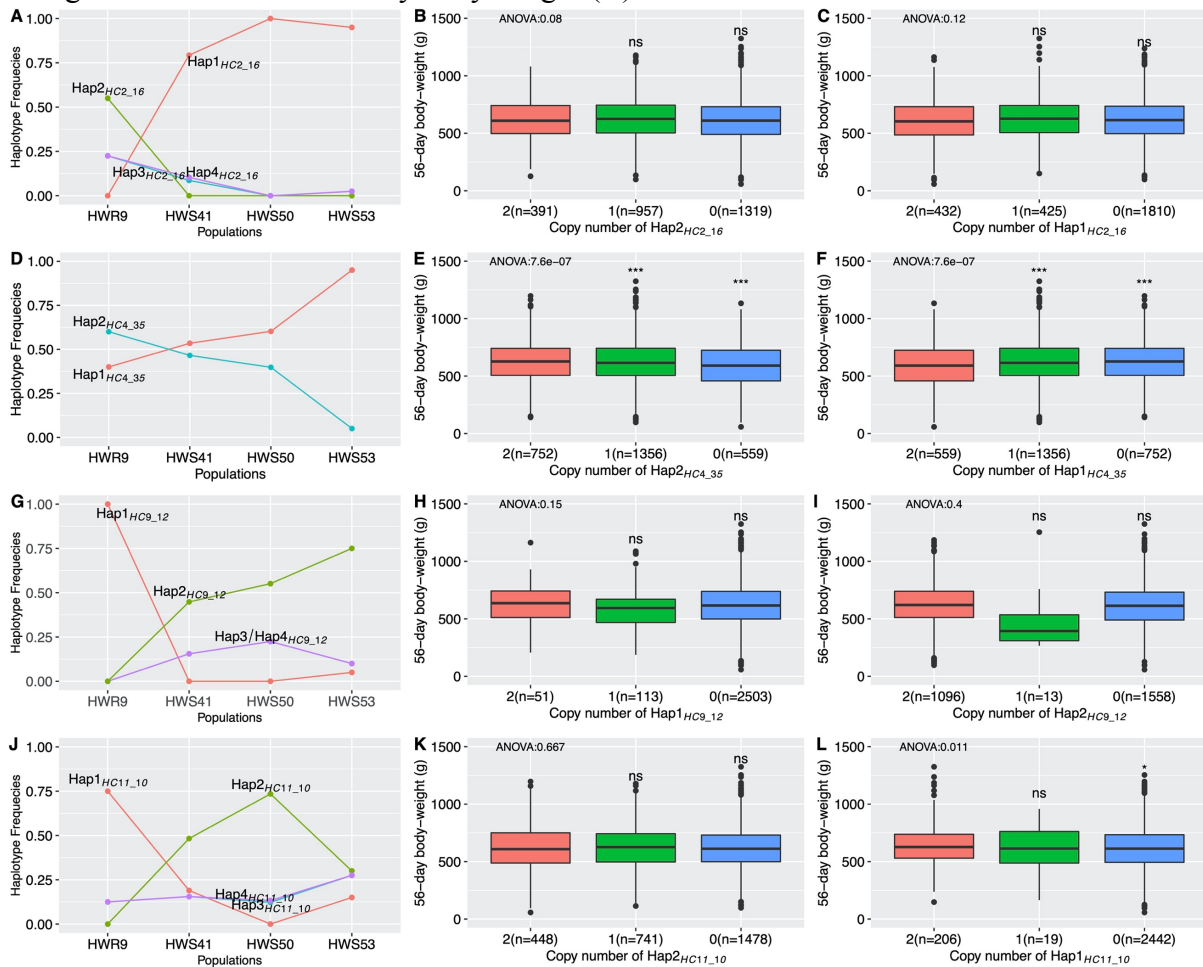

**Figure S15.** Changes in haplotype frequencies in the HW lineage **A/D/G/J** and associations between the major haplotypes in the relaxed **B/E/H/K** and selected **C/F/I/L** lines on chromosomes 2 **A-C**, chromosome 4 **D-F**, chromosome 9 **G-I** and chromosome 11 **J-L**.
